# Supplementary material
Source: PubMed Central journal article supplement (PMC4159249)
Supplement: NIHMS623460-supplement-s1.pdf [file NIHMS623460-supplement-s1.pdf]

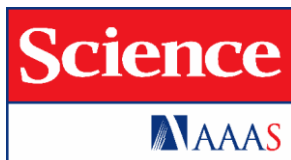

## Supplementary Materials for

### **Direct in Vivo RNAi Screen Unveils Myosin IIa as a Tumor Suppressor of Squamous Cell Carcinomas**

Daniel Schramek, Ataman Sendoel, Jeremy P. Segal, Slobodan Beronja, Evan Heller,  
Daniel Oristian, Boris Reva, Elaine Fuchs\*

\*Corresponding author. E-mail: fuchslb@rockefeller.edu

Published 17 January 2014, *Science* **343**, 309 (2014)  
DOI: 10.1126/science.1248627

**This PDF file includes:**

Materials and Methods

Figs. S1 to S23

Tables S1 to S4

References

## Materials and Methods

### Mice and lentiviral transductions

T $\beta$ RII floxed mice (17) were crossed to K14-Cre (18) and/or Rosa26YFPlox/stop/lox (19) mice and or K14-CreER mice (18). *Myh9* floxed mice were purchased from EMMA (EM:02572). CD1 mice were from Charles River laboratories. Large-scale production and concentration of lentivirus ( $6 \times 10^9$  cfu/ml) as well as ultrasound-guided lentiviral injection were performed as previously described. (20, 21) As controls for knock-down mice, littermates were infected with a non-targeting scrambled-shRNA, which activates the endogenous microRNA processing pathway but is not known to target any gene. *Myh9*<sup>fl/fl</sup> K14CreER mice were injected i.p. with 2mg tamoxifen (20mg/ml stock solution in corn oil) for 5 consecutive days at 6-8 weeks of age. DMBA/TPA treatment was performed as previously described. (22) Briefly, 7-8 week old CD1 mice in second telogen were shaved and treated with 400nmol DMBA in 100ul acetone one week later. Thereafter, mice were treated with 17nM TPA in 100ul acetone twice weekly for 20 weeks. All animals were maintained in an AAALAC-approved animal facility and procedures were performed with protocols approved by IACUC and in accordance with the National Institutes of Health.

### Constructs and RNAi

shRNA constructs for the shRNA pool were obtained from The Broad Institute's Mission TRC-1 mouse library. (23) We tested and used especially the following shRNAs targeting *Brcal*, *Trp53* and *Myh9*:

|            |                |                               |
|------------|----------------|-------------------------------|
| Brcal #560 | TRCN0000042560 | 5'-CCCATCATACTTTAATGTGTGTA-3' |
| Trp53 #361 | TRCN0000012361 | 5'-CCACTACAAGTACATGTGTGTA-3'  |
| Myh9 #503  | TRCN0000071503 | 5'-GCCCTGGAACTGTGTTTAGAA-3'   |
| Myh9 #504  | TRCN0000071504 | 5'-CGGTAAATTCATTCGTATCAA-3'   |
| Myh9 #505  | TRCN0000071505 | 5'-GCACACATTGACACAGCCAAT-3'   |
| Myh9 #506  | TRCN0000071506 | 5'-GCCATAACAACAATACCGCTT-3'   |
| Myh9 #507  | TRCN0000071507 | 5'-GCGATACTACTCAGGGCTTAT-3'   |

The scrambled shRNA 5'-CAACAAGATGAAGAGCACCAA-3' was used as the scrambled control. These hairpin sequences were cloned from the library vectors into pLKO-H2B-RFP vector. (20) All other hairpins were obtained from the TRC library and are listed in Supplementary Table 1.

### In vivo Screen

We used non-invasive, ultrasound-guided *in utero* lentiviral-mediated delivery of RNAi, which selectively transduces single-layered surface ectoderm of living E9.5 mouse embryos as previously described (24). Our prior applications of *in utero* lentiviral RNAi transductions have been restricted to rapidly growing mouse embryos, where one can screen effectively for oncogenic regulators. (20, 24, 25) However, there are caveats to using embryonic growth as a measure for tumor growth, particularly since cancers often develop in adult tissues, which are not as proliferative. Hair follicle development is also ongoing throughout embryogenesis, potentially confounding results. By lowering the titer and using less potent tumor-susceptibility mouse models such as *TGFbRII*-cKO, *Trp53* mutants and oncogenic *HRas*, we carried out an *in vivo* RNAi tumor-suppressor screen in adult mice. We titered our pool such that ~15-20% of the ~150,000 surface ectoderm progenitors were infected (fig. S2A). Based upon library size,  $\geq 20$  cells/embryo should be transduced with each shRNA, which if inconsequential should expand clonally 40X by adulthood.

### Tumor free survival.

Control and *TbRII*-cKO animals were transduced at E9.5 with low-titer shRNA pool targeting orthologs of putative HNSCC genes, including *Brcal*, *Trp53* or *Myh9*. Scrambled shRNA was used as control. Transductions and knockdowns were confirmed by real-time PCR of mRNAs isolated from newborn skin epidermis or by fluorescence microscopy of a lentiviral reporter fluor, H2B-RFP or H2B-GFP. Animals were assessed biweekly for signs of tumorigenesis, and were considered positive if lesions grew to be larger than 2mm in diameter.

### Deep Sequencing: Sample preparation, preamplification and sequence processing

Epidermal and tumor cells were subjected to genomic DNA isolation with the DNeasy Blood & Tissue Kit (Qiagen), and each sample was analyzed for target transduction using real-time PCR. 6 $\mu$ g genomic DNA of each tumor was used as template in a pre-amplification reaction with 25 cycles and Phusion High-Fidelity DNA Polymerase (NEB). PCR products were run on a 2% agarose gel, and a clean ~200 bp band was isolated using QIAquick Gel Extraction Kit as recommended by the manufacturer (Qiagen). Final samples were then sent for Illumina HiSeq 2000 sequencing. Illumina reads were trimmed to the 21 nt hairpin sequence using the FASTX-Toolkit and aligned to the TRC 2.x library with BWA (v 0.6.2)<sup>44</sup> using a maximum edit distance of 3. Hits were ranked based on (a) numbers of shRNAs that targeted the gene and scored positively in the screen, with 2 out of 5 shRNAs being considered meaningful; and (b) numbers of tumors enriched for a specific shRNA.

### Immunofluorescence staining

The following primary antibodies were used for immunofluorescence: chicken anti-GFP (1:2000; Abcam); guinea-pig anti-K5 (1:500; E. Fuchs); rat anti-K14 (1:500; E. Fuchs); rabbit anti-K6 (1:500; E. Fuchs); rabbit anti-K18 (1:500; E. Fuchs); rat anti-CD104  $\beta$ 4-integrin (346-11A, 1:300; BD); rabbit anti loricin (1:500; E. Fuchs); rabbit anti-Caspase 3 (AF835, 1:1000; R&D), rabbit anti-K10 (PRB-159P, 1:1000; Covance); rabbit anti-Myh9 (HPA001644, 1:500 Sigma); rabbit anti-SMA (ab5694 1:300; Abcam) and rabbit anti-p53 (NCL-p53-CM5p, 1:300; Leica). Secondary antibodies were conjugated to Alexa-488, 546, or 647 (1:1000, Life Technologies). Cells and tissues were processed as previously reported (20), and mounted in Vectashield HardSet mounting medium with DAPI (Life Technologies). Confocal images were captured by a scanning laser confocal microscope (LSM510 and LSM780; Carl Zeiss, Inc.) using Plan-Apochromat 20x/0.8 oil and C Apochromat 40x/1.2 water lenses. Images were processed using ImageJ and Adobe Photoshop CS3. For quantifications of nuclear p53, images were captured using an inverted Zeiss LSM 780 laser scanning microscope, powered by Zen software. Quantitative image analysis was performed using ImageJ software. To quantify p53 nuclear staining, the following formula was used: CTCF (corrected total cell fluorescence) = whole nucleus signal – (mean background signal (measured in the suprabasal layer) x area of the nucleus measured).

### Immunohistochemistry and histological analyses of mouse and human tumors

Immunohistochemistry was performed as previously described (26). Briefly, 5- $\mu$ m sections were cut, stained with H&E or processed for immunohistochemistry/immunofluorescence microscopy. Whole-mount staining of mammary glands was performed as described (26, 27). For immunoperoxidase staining, paraffin-embedded sections were dehydrated and antigenic epitopes exposed using a 10-mM citrate buffer (pH 6.0) in a pressure cooker. Sections were incubated with the following primary antibodies at 4°C overnight: rabbit anti-K14 (1:500; E. Fuchs) and rabbit anti-Myh9 (HPA001644, 1:500 Sigma). Primary antibody staining was visualized using peroxidase-conjugated anti-rabbit IgG followed by the DAB substrate kit for peroxidase visualization of secondary antibodies (Vector Laboratories). The following human tissue microarray comprising 48 healthy human skin samples, 30 hyperplastic skin lesions and 206 human skin SCCs as well as from 156 HNSCCs were obtained from US Biomax, Rockville, MD: SK244a, SK241, SK242, SK801, SK802, SK2081, SK801b and HN803a, HN811a, HN483.

### Western Blot analysis

Protein blotting was carried out using standard protocols. Briefly, total cell lysates were prepared using RIPA buffer (20 mM Tris-HCl (pH 8.0), 150 mM NaCl, 1mM EDTA, 1mM EGTA, 1% Triton X-100, 0.5% Deoxychorate, 0.1 % SDS, 25 mM  $\beta$ -glycerophosphate, 10 mM NaF, 1 mM Na<sub>3</sub>VO<sub>4</sub>) supplemented with protease inhibitors

(Complete mini, Roche). Blots were blocked with 5% BSA in 1 × TBS 0.1% Tween-20 (TBST) for 1 h and incubated with the primary antibody overnight at 4 °C (diluted in TBST according to the manufacturer's protocol). Primary antibodies were reactive to rabbit anti-Myh9 (1:500, HPA001644, Sigma); phosphorylated (P) Erk1/2 (1:1000, #9101, Cell Signaling), Erk1/2 (1:1000, #9102, Cell Signaling), mouse anti-p53 (1:500, #2524, Cell Signaling), mouse anti-p21(F5) (1:500; sc-6246, Santa Cruz), mouse anti-GAPDH (ab8245, 1:5000; Abcam), mouse anti-Chk2 (1:500, #611570, BD); rabbit anti-P-Chk1 (1:500, #12302P, Cell Signaling); mouse anti-Chk1 (1:1000, 2360S, Cell Signaling); rabbit anti-pSmad2 (Ser465/467) (1:1000, Cell Signaling) and mouse anti-Smad2/3 (610843, 1/500; BD). Blots were washed three times in TBST for 30 min, incubated with HRP-conjugated secondary antibodies (1:2,000; Promega) for 1h at room temperature, washed 3 times in TBST for 30 min and visualized using enhanced chemiluminescence (ECL).

#### p53/DNA damage responses.

For measurement of DNA damage response and p53 activation primary mouse keratinocytes were seeded at a cell density of 100,000 cells per well in a 6-well plate and allowed to grow for 24 h at 3% O<sub>2</sub> till importantly 100% confluency. Cells were then treated with doxorubicin (1mM) as previously reported (26, 27). For experiments using blebbistatin, cells were pretreated with blebbistatin (4μM final concentration, Sigma B0560) 30 min prior to doxorubicin treatment. The Rock inhibitor Y27632 was used at 10μM (Sigma Y0503) (28), LatrunculinA was used at 2μM (Sigma L5163), LeptomycinB was used at 20nM (Sigma #9676) and the proteasome inhibitor MG132 was used at 3μM (Sigma M7449).

#### mRNA quantifications.

Newborn mouse epidermal keratinocytes were cultured in 0.05 mM Ca<sup>++</sup> E-media supplemented with 15% serum (29). For lentiviral infections, cells were plated in 6-well dishes at 200,000 cells/well and incubated with lentivirus in the presence of polybrene (100mg/ml) overnight. After 2 days, infected cells were positively selected with puromycin (1mg/ml) for 3 days, and then processed for mRNA analysis. cDNAs were generated from 1μg of total RNA using the SuperScript Vilo cDNA synthesis kit (Life Technologies). Real-Time PCR was performed using the 7900HT Fast Real-Time PCR System (Applied Biosystems) and gene-specific and Ppib as well as Hprt1 control primers as well as the following primers for p53 target genes:

|                         |                                 |
|-------------------------|---------------------------------|
| p21 (Cdkn1a) fwd primer | 5'– GTGGCCTTGTCGCTGTCTT -3'     |
| p21 (Cdkn1a) rev primer | 5'– GCGCTTGGAGTGATAGAAATCTG -3' |
| Fas fwd primer          | 5'–CTGCGATGAAGAGCATGGTTT-3'     |
| Fas rev primer          | 5'–CCATAGGCGATTTCTGGGAC-3'      |
| Bax forward primer      | 5'–ATGCGTCCACCAAGAAGCTGA-3'     |

|                     |                                 |
|---------------------|---------------------------------|
| Bax reverse primer  | 5'-AGCAATCATCCTCTGCAGCTCC-'     |
| Mdm2 forward primer | 5'-TTCGGCCTTCTCCTCGCTGTCGTC -3' |
| Mdm2 reverse primer | 5'-TGGCGTAAGTGAGCATTCTGGTGA -3' |
| Bax forward primer  | 5'-TGTGTGCGACACTGTGCTC-3'       |
| Bax reverse primer  | 5'-TCGGCTAGGTAGCGGTAGTAG-3'     |
| Hprt1 for primer    | GATCAGTCAACGGGGGACATAAA         |
| Hprt1 rev primer    | CTTGCGCTCATCTTAGGCTTTGT         |
| Ppib for primer     | GTGAGCGCTTCCCAGATGAGA           |
| Ppib rev primer     | TGCCGGAGTCGACAATGATG            |

#### Explant and Migration/Invasion Assay

Explant outgrowth migration assays were performed as described previously (30). Briefly, explants were cut using a 3-mm dermal biopsy punch (Miltex), placed on fibronectin-coated 35-mm, glass-bottomed plates (MatTek), and submerged in E-media containing 0.6 mM Ca<sup>++</sup>. Explant outgrowth was monitored daily.

Transwell migration assays were performed on 24-well plates. The underside of each Boyden chamber well was coated with 10 µg/ml fibronectin and placed atop fibroblast-conditioned E-media containing 0.05 mM Ca<sup>++</sup>. A total of 50,000 keratinocytes/well were plated in 100µl E-medium containing 0.05 mM Ca<sup>++</sup>. Eight hours later, cells were washed off the top membrane and fixed on the bottom membrane. Cells were stained using H&E and counted under the microscope. Similarly, invasion assays were performed in precoated Matrigel invasion chamber (BD Biosciences).

#### Analysis of human HNSCC patient data

We analysed the publicly available data sets of the **The Cancer Genome Atlas** (TCGA: <http://cancergenome.nih.gov>). The cBioPortal for Cancer Genomics developed and maintained by the Computational Biology Center at Memorial Sloan-Kettering Cancer Center was used to mine the publicly available TCGA dataset on HNSCC (31, 32). To re-trace the exact Kaplan-Meier analysis please visit <http://bit.ly/13xxPuh> for the analysis of HNSCC patients stratified by the lowest (<5th percentile) *MYH9* expression versus the rest (≥5th percentile).

#### Statistical Analysis

All data were collected from experiments performed at least three times, and expressed as mean ± standard deviation (s.d.) or standard error of the mean (s.e.m.). Differences between groups were assayed using two-tailed student t-test and Prism 5 (GraphPad Software). Differences were considered significant if p<0.05. Data were analyzed and statistics performed (unpaired two-tailed Student's t-test) in Prism5 (GraphPad). Significant differences between two groups are noted by asterisks or p-values.

Predicting functional impact score of mutations (Mutation Assessor):

To assess the functional impact of *MYH9* mutations, we used the score of Mutation Assessor. This score assesses a mutation impact by a value of the entropic disordering caused by mutation in evolutionary conserved positions of multiple alignments of protein sequences (33). The score of Mutation Assessor have been compared in independent tests to the scores of many others prediction methods including the oldest and well recognized methods - Polyphen and Sift. It was shown that "MutationAssessor consistently provided the highest accuracies. For certain combinations metapredictors slightly improved the performance of included individual methods, but did not outperform MutationAssessor as stand-alone tool" (34). Additional studies showed that predicted high-scoring functional mutations as well as truncating mutations tend to be evolutionarily selected as compared to low-scoring and silent mutations. This result justifies prediction of mutations-drivers using a shorter list of predicted high-scoring functional mutations, rather than the "long tail" of all mutations (35).

For all mutated genes, we assessed a number of functional mutations and computed a probability (Fisher test) of obtaining the observed numbers of predicted functional mutations by chance taking as a background distribution the distribution of predicted functional mutations and predicted non-functional mutations in all other genes. This approach was used recently (36).

The obtained P-values were adjusted for false discovery rate using Benjamini and Hochberg method. The statistically significant enrichment of the predicted functional mutations in a given gene as compared to the distribution of functional mutations across all other genes demonstrates the positive selection in tumor evolution and suggests that a given gene is a driver (35).

Among 302 sequenced HNSCCs, 16 missense *MYH9* mutations surfaced (fig. S20A). Three quarters of these mutations were assessed as functional (fig. S20, B and C) by Mutation Assessor. We also assessed a probability to observe the predicted functional mutations by chance taking the distribution of predicted functionality of mutations in all other genes as a background. The significant enrichment of the predicted functional mutations demonstrates the positive selection in tumor evolution and suggests that a given gene is a driver (35). *MYH9* was ranked 16th in the list of ~15,000 genes mutated in HNSCCs ( $p=0.000026$ , false discovery rate  $q=0.024$ ) (Supplementary Table 2 and 3; fig. S21A).

MutationAssessor was used for example by the following projects:

The Cancer Genome Atlas Research Network. Nature (2011) "Integrated Genomic Analyses of Ovarian Carcinoma" (37)

The Cancer Genome Atlas Network. Nature (2008) "Comprehensive genomic characterization defines human glioblastoma genes and core pathways"(38)

Taylor et al. Cancer Cell (2010) "Integrative genomic profiling of human prostate cancer" (39)

Barretina et al. Nature Genetics (2010) "Subtype-specific genomic alterations define new targets for soft-tissue sarcoma therapy"(40)

MutationAssessor was highlighted in: Lynda Chin, William Hahn, Gad Getz and Matthew Meyerson; Genes Dev. (2011) "Making sense of cancer genomic data" (41)

## Supplementary Figures

### **Fig. S1. Strategy for using lentiviral-mediated *in utero* delivery of shRNAs to screen and study the effects of tumor suppressors on squamous cell carcinoma formation *in vivo***

(A) Kaplan-Meier analysis of tumor-free survival of mice of the indicated genotype transduced with an shRNA that efficiently targets *Brcal* #560. (n=6 for each genotype,  $p < 0.0062$ , log-rank test between *TβRII*-cKO vs. *TβRII* fl/fl mice infected with shRNA targeting *Brcal*-#560). Note that on a *TβRII*-cKO background, *Brcal* shRNA-mediated initiation of tumor growth is greatly accelerated. (B) Representative images of *Brcal* shRNA-transduced *TβRII* fl/fl and *TβRII*-cKO mice showing lesions on backskin as well as in oral cavity, respectively. (C) Representative section of a *Brcal* knockdown tumor isolated from a *TβRII* fl/fl animal showing a well-differentiated SCC. (D) *In vivo* knockdown efficiency of *Brcal* shRNA #560 in skin and in SCC tumors as measured by quantitative RT-PCR. (n=3 ± SEM \*  $p < 0.05$ ).

### **Fig. S2. Determining suitable viral titer and measuring lentiviral shRNA library representation**

(A) Control lentivirus (pLKO), harboring an H2B-GFP reporter transgene and a U6-driven scrambled shRNA control (Scr) expression vector was used in a dilution series to determine the appropriate dilution/titer required to selectively and stably transduce about 15-20% of surface ectoderm keratinocytes *in vivo* by ultrasound-guided *in utero* delivery to the amniotic sacs of living E9.5 embryos. Fluorescence activated cell sorting (FACS) analyses of epidermal keratinocytes isolated from transduced pups at E18.5 were used for quantifications. Comparative quantitative RT-PCR was then used to estimate the required dilution of the test lentiviral shRNA library needed to give rise to 15-20% of infection. Control lentivirus as well as the test lentiviral shRNA library had an initial titer of  $\sim 6 \times 10^9$  cfu/ml and were diluted 40X for all subsequent infections. (B) Scatter plot of Illumina sequencing data, illustrating good correlation between the number of reads per shRNA in DNA isolated from the lentiviral plasmid library versus the actual shRNA representation in DNA isolated from transduced epidermal keratinocytes of mouse embryos 3 days after infection with the lentiviral library (R=non-parametric (Spearman) correlation coefficient).

### **Fig. S3. SCC formation in *TβRII*-cKO mice infected with the shRNA library**

(A) Histological sections of invasive SCC from oral cavity/lip of a transduced *TβRII*-cKO mouse. Different magnifications accentuate tumor heterogeneity, with well-differentiated areas (typified by keratin pearls) adjacent to poorly-differentiated areas. Note invasion into subcutaneous muscle (arrowheads) as well as moderate atypia characterized by anisokaryosis and anisocytosis, hyperchromasia, and frequent large and



prominent nucleoli. Mitoses were on average 10X more frequent than the surrounding WT tissue (arrows). **(B)** Representative immunofluorescence analyses for basal markers Keratin 5 and  $\beta$ 4-integrin, differentiation marker Loricrin, and proliferation marker Ki67 on tumor sections from adult *T $\beta$ R11*-cKO mice that had been infected with the lentiviral shRNA library at E9.5 in utero.

**Fig. S4. SCC formation in adult *T $\beta$ R11*-cKO mice derived from embryos whose surface ectoderm was infected with the shRNA library**

**(A to D)** Representative H&E images of tumor sections showing invasive SCC arising from various transduced epithelial tissues as indicated. **(A)** At the mucocutaneous junction, a poorly demarcated neoplasm has invaded the dermis. The SCC is composed of nests and cords of basal cells exhibiting signs of squamous differentiation, notably eosinophilic keratin pearls. Some nests show evidence of stroma invasion associated with a desmoplastic stroma. Cellular atypia are minimal and mitoses are not observed within well-differentiated areas. The overlying epidermis is moderately hyperplastic and hyperkeratotic. The tumor is infiltrated by numerous neutrophils. **(B)** Backskin squamous cell carcinoma invading the underlying dermis and subcutaneous tissue. The SCC is well-demarcated, but in several areas, cells have detached from the main tumor and invaded into subcutaneous tissues. Invasive regions are characterized by small nests and cords of basal cells that have broken through the basement membrane and invaded adjacent stroma and muscle. This contrasts with nests of well-differentiated stratified squamous epithelium in the infundibular regions that are replete with keratinization. Throughout the tumor are scattered moderate to marked atypia characterized by fourfold anisokaryosis and anisocytosis, hyperchromasia, and variation in nucleolar size with frequent large and prominent nucleoli. Mitoses are prevalent at ~38/ ten 400x fields. **(C)** In this example, both cornea and eyelid are enlarged and their architecture is distorted by a poorly demarcated neoplasm composed of nests and cord of basal cells showing squamous differentiation and formation of keratin pearls. Some nests show evidence of stromal invasion associated with a desmoplastic stroma. Cellular atypia are minimal and mitoses are not observed. The overlying epidermis is moderately hyperplastic and hyperkeratotic. The tumor is infiltrated by numerous neutrophils. The cornea and conjunctiva are infiltrated by numerous neutrophils. In one eye, the lens is present in the section and shows swelling and liquefaction of lens fibers and posterior migration of lens epithelium. These tumors were often large, with involvement of both cornea and eyelids. The conjunctivitis and keratitis are ocular changes that appear to be secondary to expansion of the eyelid. **(D)** An SCC that has invaded subcutaneous tissues and the salivary gland. The tumor is a poorly demarcated and infiltrative neoplasm, composed of basal-like cells forming nests and cords supported by desmoplastic stroma. Cells are polygonal, have indistinct borders, and display a moderate amount of eosinophilic cytoplasm. They have ovoid nuclei with finely stippled chromatin and small nucleoli. There is threefold anisokaryosis, and an average of 12 mitoses per 400x fields. The skin shows a focally

extensive area of epidermal hyperplasia, with focal epidermal ulceration with serocellular crusting. The dermis is infiltrated by moderate numbers of neutrophils and macrophages, and fewer lymphocytes.

**Fig. S5. Formation of benign lesions in *TβRII*-cKO mice derived from embryos whose surface ectoderm was infected with the shRNA library**

(A to C) Representative H&E images of sections from affected *TβRII*-cKO epithelial tissues of mice that were transduced as embryos with the lentiviral shRNA library. (A) Neoplasm of basal cell tumor that appeared to be benign based on histologic features. Note the well-demarcated epidermal neoplasm that extends deep into the underlying dermis. It is composed of thin cords and nests of basaloid cells surrounded by fibrous stroma. Epithelial cells display indistinct borders, a small amount of amphophilic cytoplasm, and oval nuclei with finely stippled chromatin and multiple small nucleoli. An average of 3 mitoses were seen for every ten 400x fields. Overlying epidermis and infundibular epithelium show moderate hyperplasia and orthokeratotic hyperkeratosis. A few mm from this tumor is a well-demarcated region of deep dermal and subcutaneous fibrosis. (B) This squamous papilloma displays an exophytic, well demarcated neoplasm, composed of a branching papillary structure and markedly proliferative, but well differentiated, epidermis. Note marked orthokeratotic hyperkeratosis supported by thin stalks of fibrovascular stroma. The proliferative epidermis shows occasional mild dysplasia. The stroma is focally infiltrated by moderate numbers of melanophages and/or melanocytes, and moderate numbers of lymphocytes. (C) Some lesions showed no signs of malignancy. In this example, only ulceration is seen, with moderate neutrophilic and histiocytic dermatitis and weak signs of epidermal hyperplasia, indicating that these lesions are likely to be preneoplastic. Note focally extensive areas of mild epidermal hyperplasia, with multifocal epidermal ulceration associated and serocellular crusting and dermal necrosis. The superficial, mid and deep dermis is multifocally infiltrated by small to moderate numbers of neutrophils and macrophages, and fewer lymphocytes.

**Fig. S6. *Trp53* knockdown triggers SCC development in *TβRII*-cKO mice**

(A) In vivo knockdown efficiency of *Trp53* shRNAs in skin as measured by quantitative RT-PCR. (n=3 ± SEM \* p<0.05; \*\* p<0.001). (B) Kaplan-Meier analysis of tumor-free survival of mice of the indicated genotype transduced with an shRNA that efficiently targets *Trp53* (#361). Of note, *Trp53* shRNA-transduced *TβRII*-cKO mice show a median tumour-free survival of 147 days. (n=6 for each genotype, p<0.0047, log-rank test).

**Fig. S7. *Myh9* knockdown delays hair follicle downgrowth and impedes eyelid closure.**

(A) Quantitative RT-PCR of *Myh9* mRNA in primary murine keratinocytes infected with various *Myh9*-shRNA lentiviruses. (n=3 ± SEM \* p<0.005) (B) Immunoblot analysis of protein lysates from epidermal keratinocytes of newborn mice transduced in utero with indicated *Myh9*-shRNAs. (C) Myosin-IIa immunohistochemistry of skin sections from

these mice transduced at E9.5 with scrambled-control or *Myh9* #504 shRNAs, and examined at birth. Note loss of myosin-IIa and impaired hair follicle down-growth in *Myh9*-knockdown animals. **(D)** Newborn mice reveal “Open Eyes at Birth” phenotype indicative of an impediment to eyelid closure during embryonic development. Inset shows that mice were efficiently transduced with the lentivirus, as judged by expression of the reporter H2B-RFP fusion protein. **(E)** 8 day-old *Myh9* shRNA-transduced mice show sparse and delayed hair growth compared to scrambled shRNA transduced littermate controls.

**Fig. S8. *Myh9* knockdown does not interfere with tissue homeostasis in skin in young animals**

**(A to D)** Fluorescence microscopy of frozen skin sections from *Myh9* knockdown *TβRII*-cKO and *TβRII* fl/fl mice at one **(A and B)** or three **(C and D)** months of age. Mice had been transduced *in utero* at E9.5 with lentivirus expressing an H2B-RFP reporter and either *Myh9* #504 or scrambled shRNAs. Note that transduced regions (RFP+) show grossly normal immunolabeling for **(A)** Keratin 14 (K14) in the basal cells of interfollicular epidermis and hair follicles, and **(B)** Keratin 10 (K10) specific for terminally differentiating epidermis. In older animals, sparse areas of epithelial thickening were noted, concomitant with expanded K14 expression **(C)** and induction of K6, associated with a hyperproliferative state **(D)**.

**Fig. S9. Validation of *Myh9* as a tumor suppressor**

**(A)** Sections of tumors from *TβRII*-cKO mice, transduced with shRNAs targeting *Brcal* or *Myh9*, respectively, and immunolabeled for myosin-IIa (absent in the epithelium of *Myh9* #504 shRNA-targeted SCCs). **(B to D)** Immunofluorescence microscopy of frozen tissue sections from tumors arising spontaneously in *TβRII*-cKO mice that had been transduced as embryos with *Myh9* shRNAs. Note architecture of poorly differentiated SCCs with **(B)** β4-integrin and K5-expressing nodules, **(C)** high proliferation rates in the basal layer as indicated by nuclear Ki67 and **(D)** reduced expression of differentiation markers such as Loricrin. **(E to H)** H&E of paraffin sections of these tumors confirmed their identity as poorly differentiated squamous cell carcinomas that invade into **(E)** subcutaneous fat, **(F)** skeletal muscle, **(G)** salivary gland and **(H)** locally draining lymph node.

**Fig. S10. Genetic ablation of *Myh9* phenocopies *Myh9* shRNA knock-down**

**(A)** Western Blot analysis of keratinocytes purified from *Myh9* fl/fl K14-Cre (*Myh9*-cKO) mice and control littermates shows target-specific reduced expression of myosin-IIa. **(B)** Anti-myosin-IIa immunolabeling of skin sections of wild-type and K14-Cre conditionally targeted *Myh9*-cKO animals. Note the antibody specificity and the recapitulation of the impediment to hair follicle down-growth, also seen with *Myh9* knock-down animals. **(C)** Histology of skin sections of double mutant (*Myh9/TβRII* iKO)

mice generated by inducing K14-driven CreER with topical application of tamoxifen. Note grossly normal skin morphology. **(D)** Representative *Myh9/TβRII* iKO animal as well as H&E section showing a poorly differentiated skin SCC that has invaded through the skeletal muscle into the deep subcutaneous structures and lymph nodes. **(E)** Representative *Myh9/TβRII* iKO animal as well as H&E section showing a moderately differentiated invasive anogenital squamous cell carcinoma that has invaded the colonic epithelium. The colonic epithelium is not neoplastic, but is ulcerated and inflamed with some reactive changes.

**Fig. S11. Myh9 regulates epidermal outgrowth from skin explants**

**(A and B)** Representative phase-contrast and epifluorescence images of **(A)** *TβRII* fl/fl and **(B)** *TβRII*-cKO skin explants from E18.5 embryos infected at E9.5 with scrambled-control or shRNAs construct targeting *Myh9*. Viral constructs harbored reporter genes encoding either membranous GFP (mGFP) or H2B-RFP. Epidermal outgrowth was monitored for 48 hr and was significantly increased in *Myh9* shRNA-transduced keratinocytes compared to scrambled control transduced explants of *TβRII*-proficient and deficient cells. White dotted lines mark leading edges; red arrows denote distance between explant and its leading edge. **(C and D)** Quantifications of epidermal outgrowth from skin explants of **(C)** *TβRII* fl/fl and **(D)** *TβRII*-cKO mice transduced with indicated knock-down constructs. (n=3 ± SEM \* p<0.05, two-tailed t test between scrambled and each *Myh9* knock-down construct)

**Fig. S12. Myh9 knockdown enhances keratinocyte migration in a scratch wound assay *in vitro*.**

**(A)** Shown are representative temporal phase-contrast and RFP epifluorescence images of scratch wound assays on keratinocytes infected *in vitro* with scrambled-control or *Myh9* shRNAs #504. Yellow arrows indicate the extent of wound closure. H2B-RFP marks transduced keratinocytes as shown in the last panel. **(B and C)** Transwell migration assays through Boyden chambers coated with **(B)** fibronectin (migration assay) or with **(C)** Matrigel ECM (invasion assay). *Myh9*-deficiency markedly increases migration and invasion towards fibroblast-conditioned medium (bottom chamber), irrespective of *TβRII*-cKO status. (n=3 ± SEM \* p<0.05 and \*\* p<0.005, two-tailed t test between scrambled and each *Myh9*- knockdown construct).

**Fig. S13. Myh9 regulates oncogenic H-Ras-driven but not Trp53-driven tumorigenesis**

**(A)** Kaplan-Meier analysis of tumor-free survival of DMBA/TPA treated (*H-Ras*-induced) syngenic CD1 mice transduced with the indicated shRNA. (n=6 for each genotype, p<0.0005, log-rank test between scrambled control and each *Myh9* shRNA infected mice). **(B)** Representative images of CD1 mice, transduced *in utero* with either scrambled control or *Myh9* shRNA #504 12-weeks after DMBA-treatment. **(C)** Tumor

multiplicity of DMBA/TPA-treated CD1 mice transduced with the indicated shRNA. (n=6 for each genotype). **(D)** SCC conversion frequency in syngenic CD1 mice transduced with the indicated shRNA 20-weeks after DMBA-treatment. **(E)** Representative H&E as well as myosin-IIa IHC images of tumors from CD1 mice transduced in utero with either scrambled control or *Myh9* shRNAs #504 20-weeks after DMBA-treatment. **(F)** Kaplan-Meier analysis of tumor-free survival of mice of the indicated genotype transduced with two shRNAs that efficiently target *Myh9*. (n=6 for each genotype, p=ns, log-rank test). Note that whether mice are singly mutant for *Trp53*, singly deficient for *Myh9* or doubly mutant for *Trp53/Myh9*, their Kaplan-Meier profiles for SCCs are comparable. **(G)** Kaplan-Meier analysis of tumor-free survival of mice of the indicated genotype transduced with shRNAs that efficiently target *Myh9* or *Trp53*. (n<6 for each genotype). Note that whether mice conditionally null for *TβRII* are also singly deficient for *Trp53*, singly deficient for *Myh9* or doubly deficient for *Trp53/Myh9*, their Kaplan-Meier profiles for SCCs are comparable.

**Fig. S14. *Myh9* regulates p53.**

**(A)** p53 and p21 expression after treatment with DNA damage response drug doxorubicin (Dox; 1μM). Primary mouse epidermal keratinocytes were transduced with the different *Myh9* shRNAs as indicated. Myosin-IIa and GAPDH levels are indicated as control. **(B)** p53 and p21 expression after treatment with DNA-damage-response inducer doxorubicin (1μM) in *Myh9*fl/fl keratinocytes after adenoviral-Cre-mediated *Myh9* ablation (KO). Myosin-IIa and GAPDH levels are shown as controls. **(C)** Quantification of p53 in nuclei of the skin of *Myh9* cKO and control mice 6 hours after treatment g-irradiation (5Gy) as shown in Fig. 3B. Plotted is the corrected total cell fluorescence (CTCF) per cell and the median with interquartile range. (p < 0.0001; Mann Whitney test). **(D)** Representative images showing p53 expression in the skin of *Myh9* knock-down (H2B-RFP labeled) mice either left untreated or 6 hours after γ-irradiation (5Gy). Note that p53 staining is only observed in basal, keratin 5 positive cells. Note also that H2B-RFP labeled *Myh9* shRNA #507-infected cells do not show efficient nuclear p53 staining. Mosaic analysis shows that the effect shown is cell-intrinsic.

**Fig. S15. *Myh9* ablation does not affect EGF signaling.**

**(A)** *Myh9* knockdown keratinocytes efficiently respond to EGF. Western Blot of phosphorylated (activated) Erk after EGF stimulation (20ng/ml) of *TβRII* fl/fl (wt) and *TβRII*-cKO (KO) keratinocytes infected in vitro with various *Myh9* knockdown constructs.

**Fig. S16. *Myh9* but not *Myh10* or *Myh14* regulates p53 in *TβRII*-wt and also in *TβRII*-cKO keratinocytes.**

**(A)** p53 and p21 expression after treatment with DNA-damage-response inducer doxorubicin (1μM) in wt keratinocytes after shRNA-mediated knockdown of *Myh9*,

*Myh10* and *Myh14*. GAPDH levels are shown as controls. **(B)** qRT-PCR analysis confirming efficient shRNA-mediated knockdown of *Myh9*, *Myh10* and *Myh14*. **(C)** p53 and p21 expression after doxorubicin (Dox; 1 $\mu$ M) treatment of *T $\beta$ RII*-cKO keratinocytes transduced by lentiviral delivery of *Myh9* shRNAs and Cre recombinase. Myosin-IIa and GAPDH levels are indicated as control. **(D)** Western Blot of phosphorylated (activated) P-SMAD2 in *T $\beta$ RII* fl/fl keratinocytes transduced with indicated lentiviral constructs. Note that as expected, LV-Cre mediated targeting of *T $\beta$ RII* resulted in loss of P-SMAD2 activity downstream of TGF $\beta$  Receptor signaling. Myosin-IIa, total SMAD2, activated phosphorylated P-ERK and total ERK are shown as controls. **(E)** qPCR analysis of *T $\beta$ RII* to verify LV-Cre mediated ablation of *T $\beta$ RII* gene expression.

**Fig. S17. Optimal p53 activity following DNA damage depends upon myosin-IIa's ATPase activity and its role in p53 nuclear retention**

**(A)** p53 expression in mouse keratinocytes treated with myosin ATPase inhibitor blebbistatin (4 $\mu$ M) and with doxorubicin (Dox; 1 $\mu$ M). GAPDH levels are indicated as control. **(B)** Western Blot of p53 in mouse keratinocytes treated with vehicle, blebbistatin, Rock inhibitor Y27632 or latrunculinB. Activated phosphorylated H2AX ( $\gamma$ H2AX) as well as activated phosphorylated Chk1 and Chk2 show normal initial DDR activation. Note activation-dependent mobility shift of Chk2. Total Chk1 and GAPDH are shown as controls. **(C)** MG132 rescues *Myh9* phenotype. **(D)** Nuclear export inhibitor LeptomycinB rescues the *Myh9* knockdown phenotype and restores p53 accumulation after DNA damage.

**Fig. S18. Expression of myosin-IIa in human HNSCC and skin SCCs**

**(A)** Myosin-IIa Western Blot of primary *Myh9*-cKO keratinocytes to validate the efficacy of the myosin-IIa antibody. Representative images of myosin-IIa immunohistochemistry of human skin as well as representative images of myosin-IIa immunohistochemistry of human SCC samples showing variability in myosin-IIa staining ranging from negative to weak, moderate and strong. K14 immunohistochemistry internally controlled for epithelial areas and tissue quality. **(B)** Analysis of human skin SCCs with respect to tumor grading and then stratified according to presence or absence of myosin-IIa expression. **(C)** Analysis of human skin SCCs with respect to absence or presence of TGF $\beta$  signaling as assessed by immunolabeling for T $\beta$ RII and active P-SMAD2 and stratified according to presence or absence of myosin-IIa expression.

**Fig. S19. High MYH9 expression does not correlate with shortened human HNSCC survival**

**(A)** Raw RNAseq data of HNSCC samples in the TCGA database showing the spread of *MYH9* RNA expression in all samples across the cohort of 303 patient samples. Graph delineates the z-score of *MYH9* mRNA expression defined as the relative expression of an individual gene and tumor to the gene's expression distribution in a reference

population, which is all tumors that are diploid for the gene in question. The returned value indicates the number of standard deviations away from the mean of expression in the reference population (z-score). This measure is useful to determine whether a gene is up- or down-regulated relative to the normal samples or all other tumor samples. In Fig. 4C we used the bottom 5th percentile, which equaled samples with a z-score of -1.6 or less (all samples below the red line) to perform the Kaplan-Meier survival analysis. Interestingly, this analysis also shows quite some HNSCC cases with upregulation of *MYH9* mRNA expression – top 33 tumors (or top 11%) out of our cohort of 303 HNSCCs. **(B)** Kaplan-Meier survival analysis of of HNSCC cases with *MYH9* mRNA upregulation (above 1.6 standard deviations or more indicated by the red line in fig. S19A). In contrast to the data for the low *MYH9* expression, these patients do not show any survival disadvantage/advantage when compared to the rest of the cohort. **(C)** Kaplan-Meier survival analysis of of HNSCC cases with *MYH9* mRNA upregulation, *MYH9* amplifications or gains. Of note, amplifications are defined as larger chromosomal amplifications while gains are defined as local amplifications. No survival disadvantage/advantage. **(D)** Kaplan-Meier survival analysis of of HNSCC cases with *MYH9* hemizygosity. No survival disadvantage/advantage. **(E)** Kaplan-Meier survival analysis of of HNSCC cases with *MYH9* mutations. No survival disadvantage/advantage.

**Fig. S20. Mutations in myosin-IIa in human HNSCCs**

**(A)** Schematic of human myosin-IIa delineating the N-terminal SH3-like domain, the myosin head domain with the ATPase function, the ATP binding pockets P-loop (P) and switch region I and II (I and II), the IQ-calmodulin binding domain and the myosin tail. Missense mutations as well as deletions are given with their respective functional impact score overhead. Note that most of the mutations are within the ATPase domain clustering in and around the switch-II region (p=0.0015; Fisher test corrected for false discovery rate). Of note, mutations of the conserved A454 (blue) residue have been shown in *Dictyostelium* myosin to abrogate ATPase function. E457K (red) mutant myosin was tested and shown to have an effect on DDR-induced p53 activation (fig. S221). **(B)** List of *MYH9*/myosin-IIa mutations found in HNSCCs and their computed functional impact score ([www.mutationassessor.org](http://www.mutationassessor.org)). **(C)** Multiple sequence alignment of human, dog, mouse, rat, chicken *MYH9* and *Dictyostelium discoideum* myosin-2 heavy chain. Multiple sequence alignment by MAFFT v7.058b (E-INSi strategy, Blosum 62, Offset value 0.123) and visualization using Jalview 2.8.

**Fig. S21. Prevalence of *MYH9* somatic mutations and hemizygosity in human cancers.**

**(A)** Mutational spectrum of *MYH9* across 19 human tumor types and 1000 human cancer cell lines (modified from cBioPortal: <http://www.cbioportal.org/public-portal/>). Statistics shown were mined from the TCGA databases.

**Fig. S22. Mutations within the ATPase domain of *MYH9* impair p53 activation.**

(A) Representative immunofluorescence images of phalloidin and anti-GFP stained mouse keratinocytes expressing either wildtype human EGFP-*MYH9* or mutant human EGFP-*MYH9* (E457K). (B) p53 expression in primary mouse keratinocytes infected with either vector control lentivirus or lentivirus harboring wildtype human EGFP-*MYH9* (wt) or mutant human EGFP-*MYH9* (E457K) or (E530K) and treated with with DDR-inducer doxorubicin (Dox; 1  $\mu$ M). GAPDH levels are indicated as control.

**Fig. S23. *Trp53* mutations and p53 inactivating mutations are not mutually exclusive in HNSCCs.**

OncoPrints visualizing p53 pathway alterations across the TCGA data base for (A) HNSCCs and (B) glioblastomas visually identifying trends in mutual exclusivity or co-occurrence between *Trp53* and its negative regulators *MDM2* and *MDM4* as well as *MYH9*. The individual genes are represented as rows, and individual patients are represented as columns. Tables present the statistics and tendency towards mutual exclusivity and co-occurrence. Of note, it seems that in HNSCCs *Trp53* mutations are not necessarily mutually exclusive with other p53 inactivating mutations/alterations, such as *MDM2*, *MDM4* and *MYH9*. To re-trace the exact analysis please visit: <http://bit.ly/175U255> for HNSCC analysis and <http://bit.ly/1fFcqUN> for glioblastoma analysis.



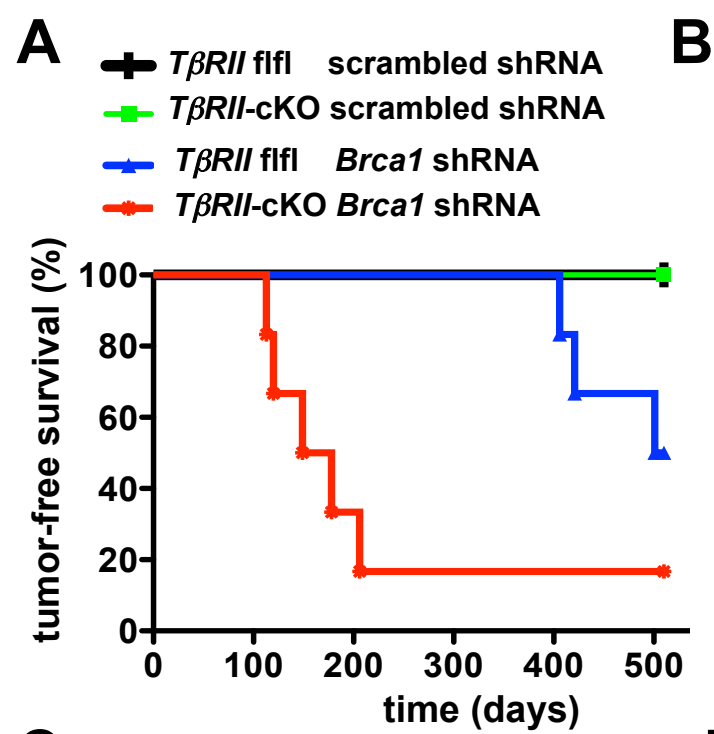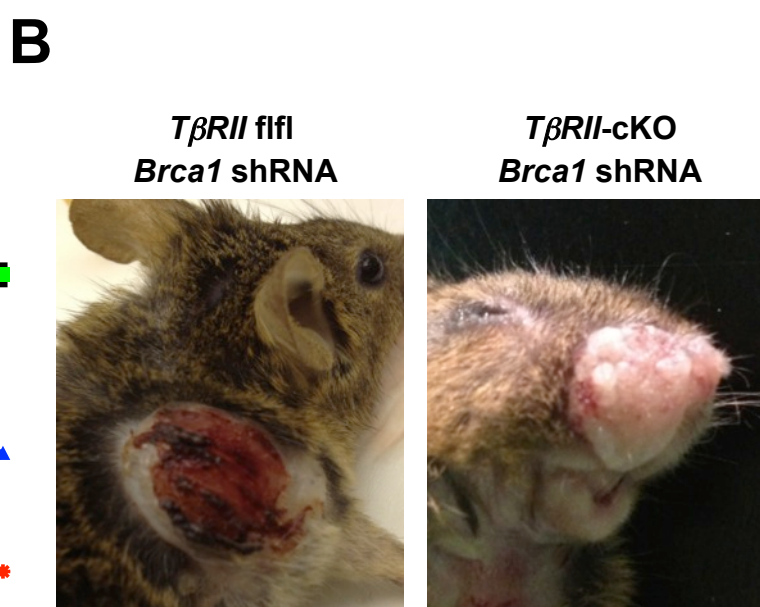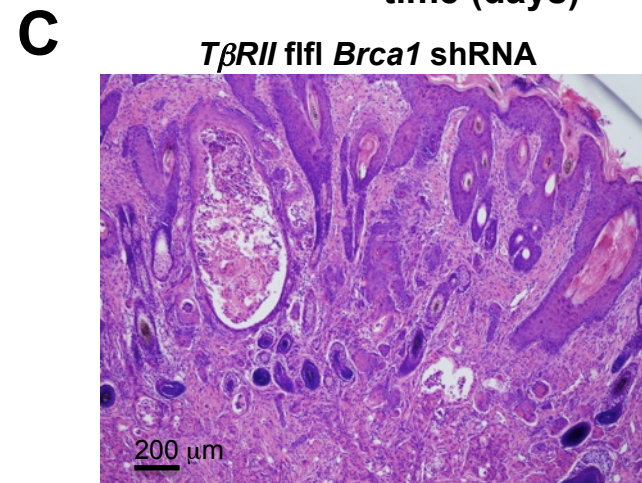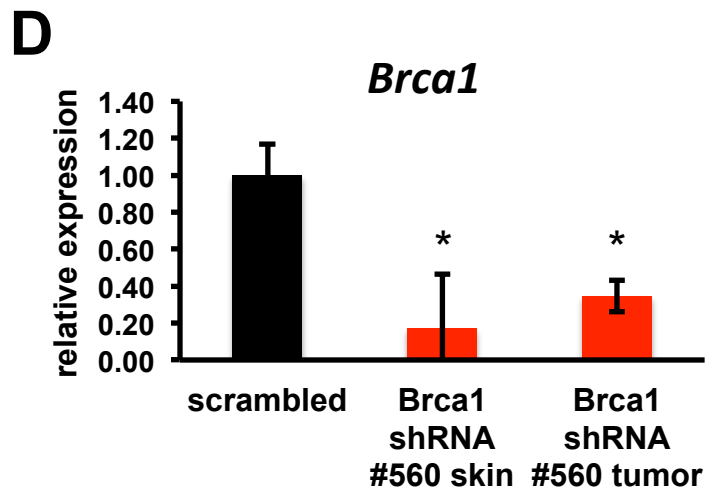

**Figure S1**

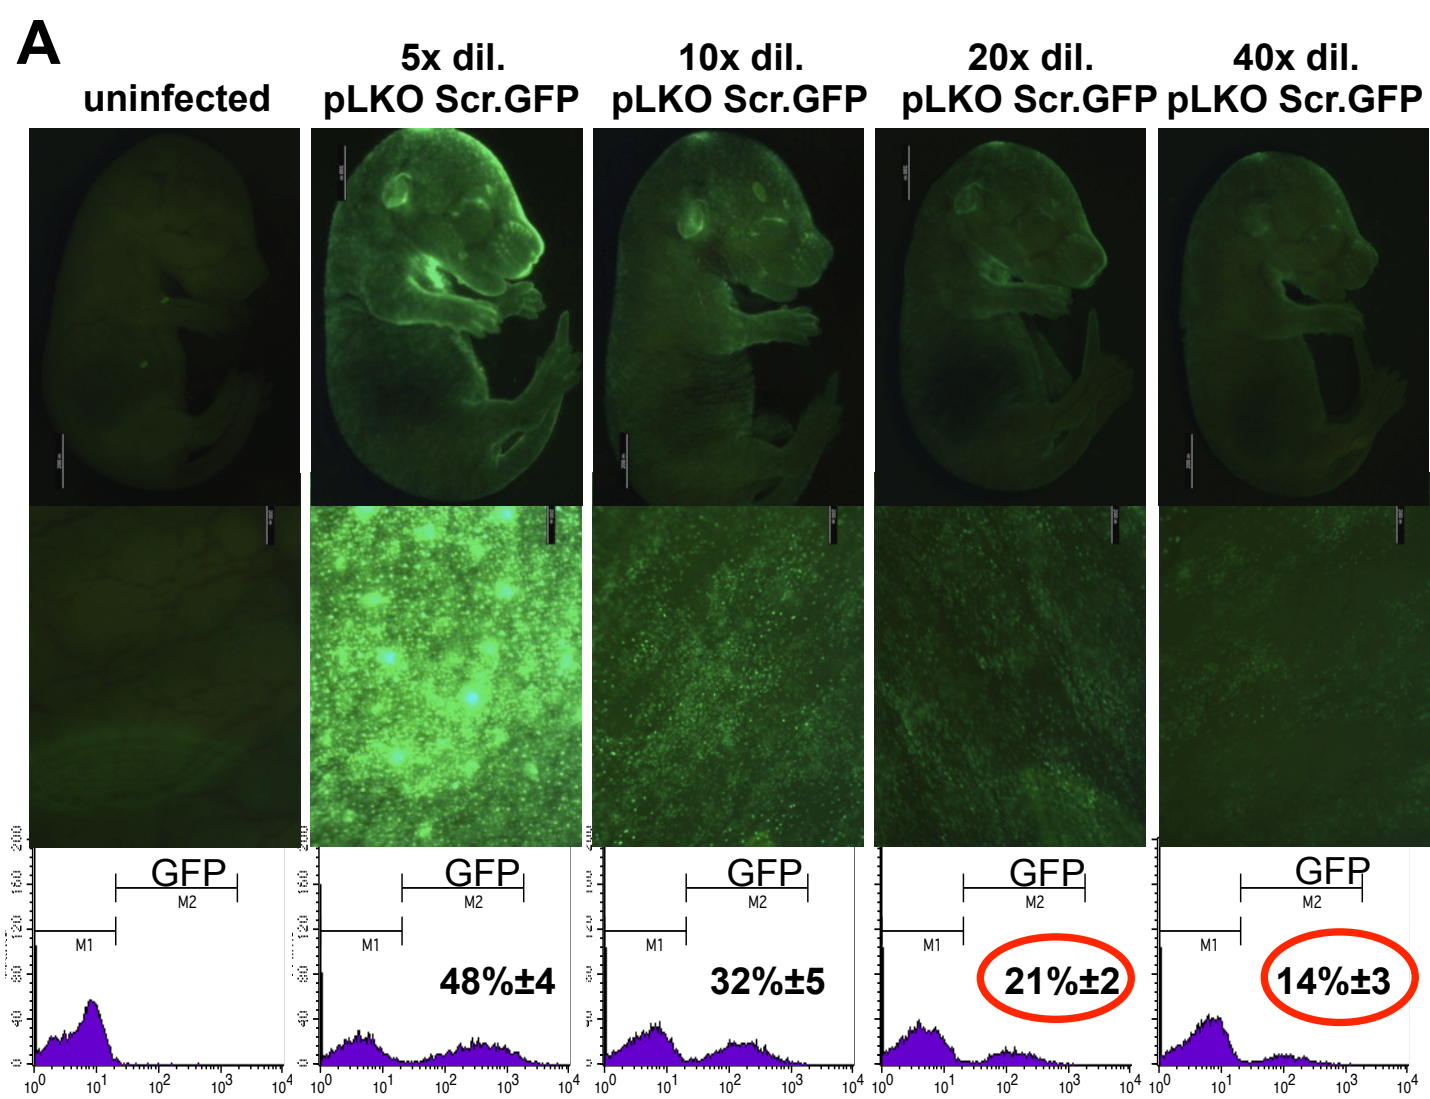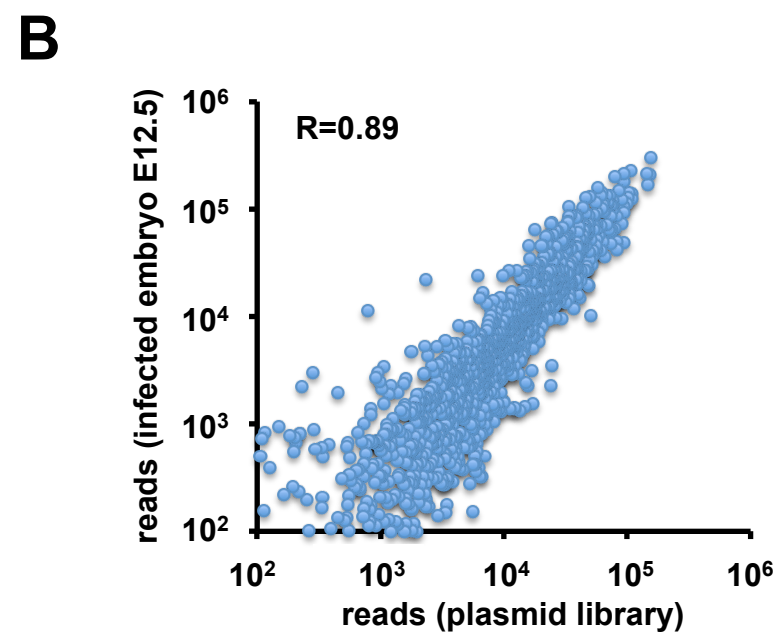

**Figure S2**

# Invasive SCC at oral mucocutaneous junction

## A

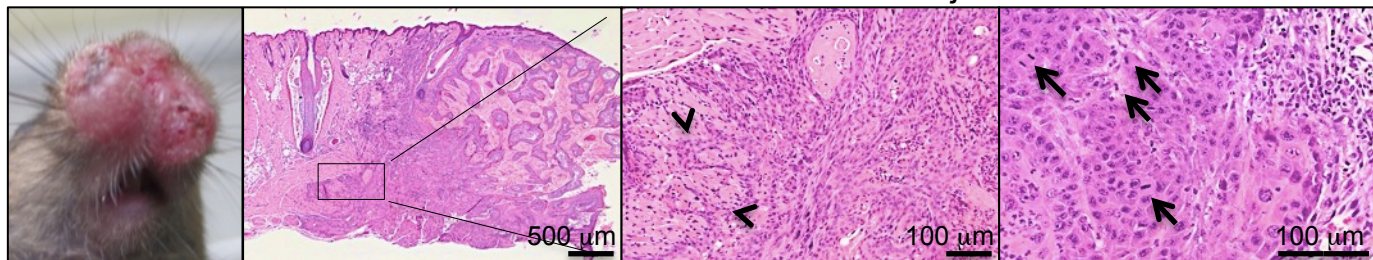

## B

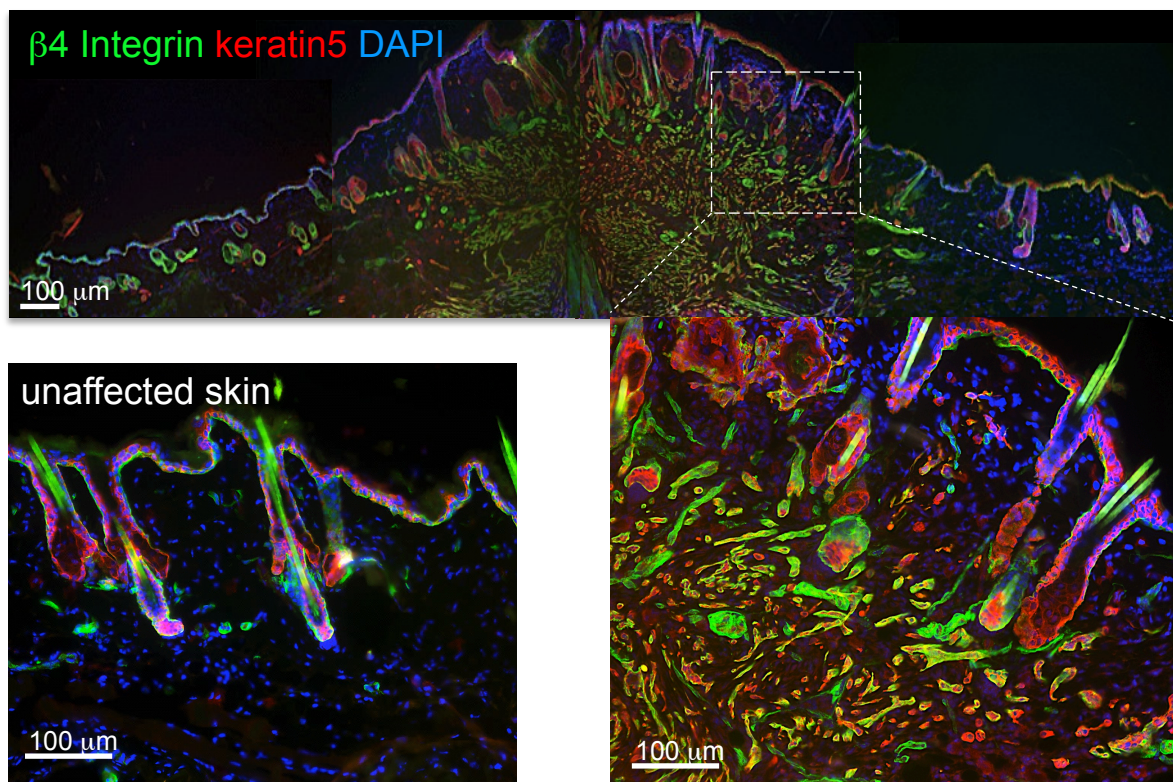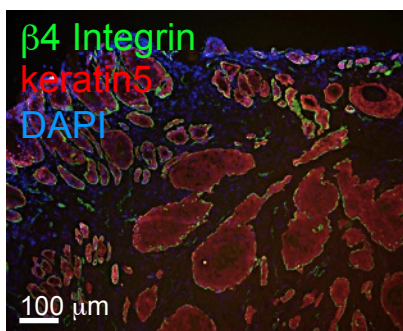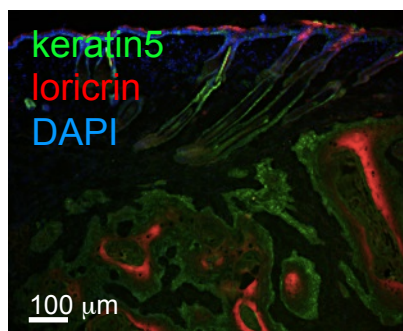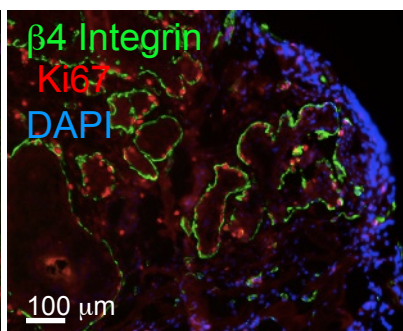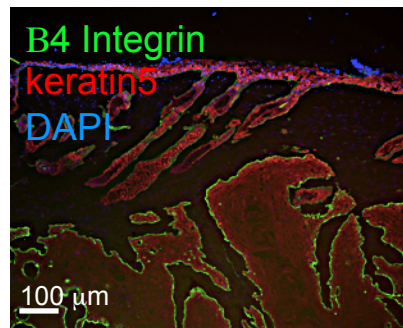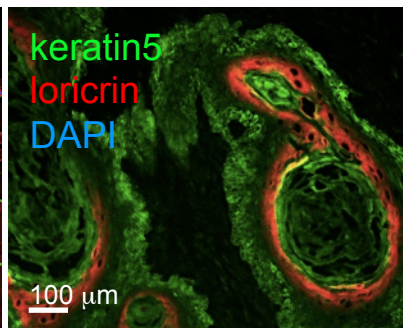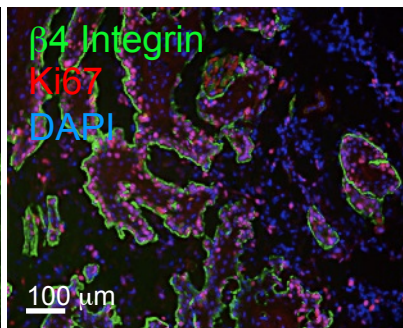

# Figure S3

**A** Tumor #52: Invasive SCC at mucocutaneous junction

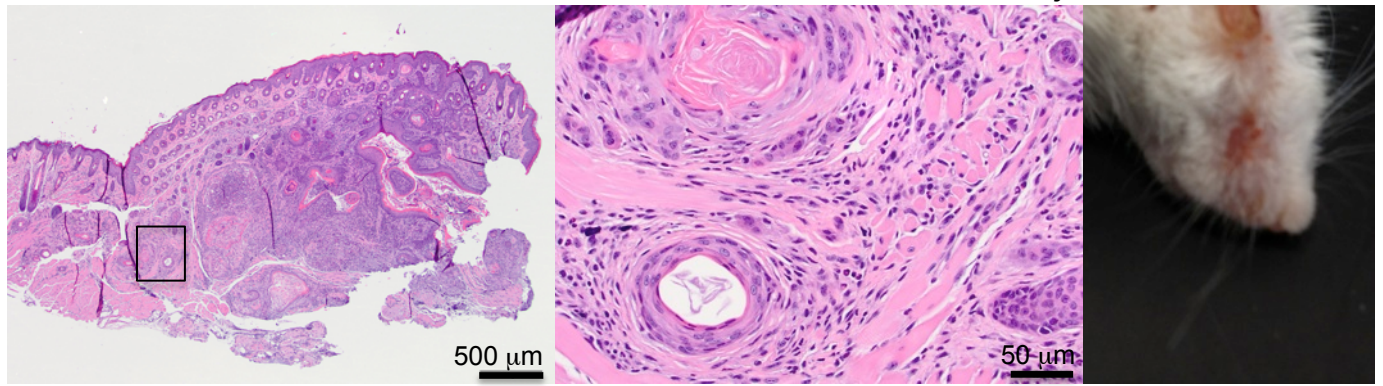

**B** Tumor #6: Invasive SCC of the back skin

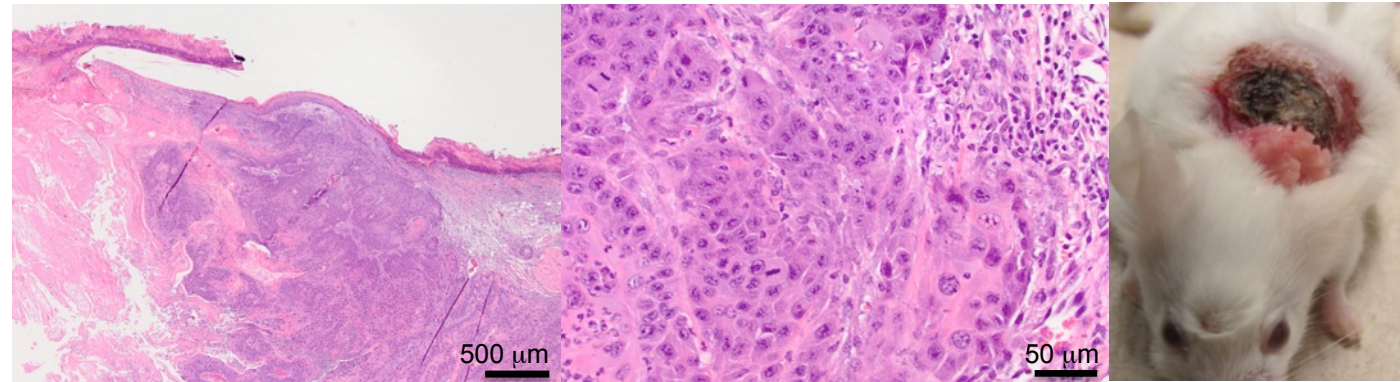

**C** Tumor #50: Invasive SCC of the eyelid and cornea, mucocutaneous junction

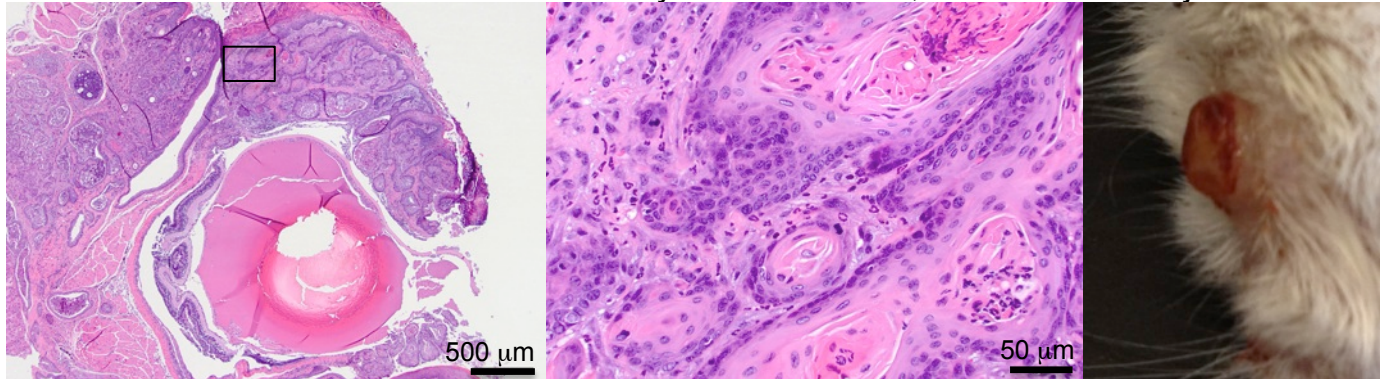

**D** Tumor #69: Subcutaneous tissues and salivary gland: Invasive SCC

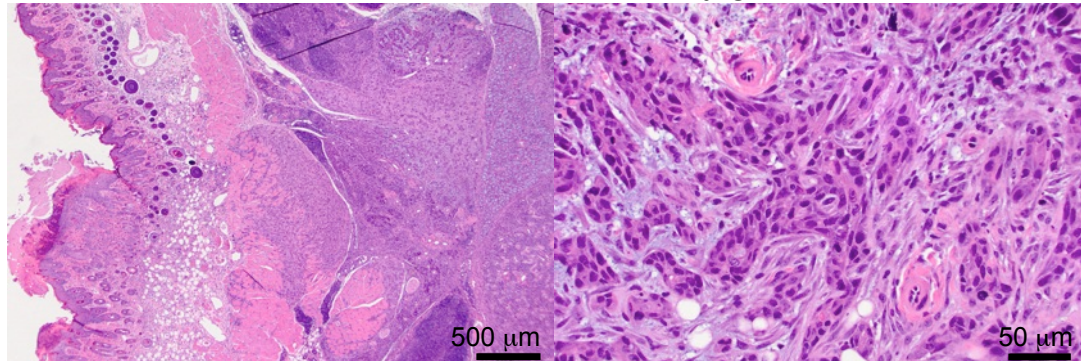

**Figure S4**

Tumor #53: Benign Basal cell tumor

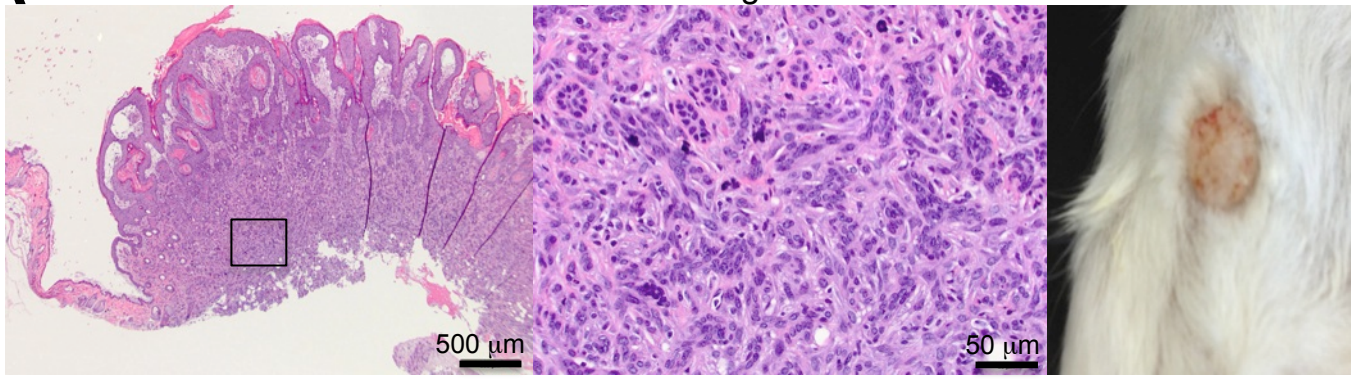

Lesion #60: Squamous papilloma

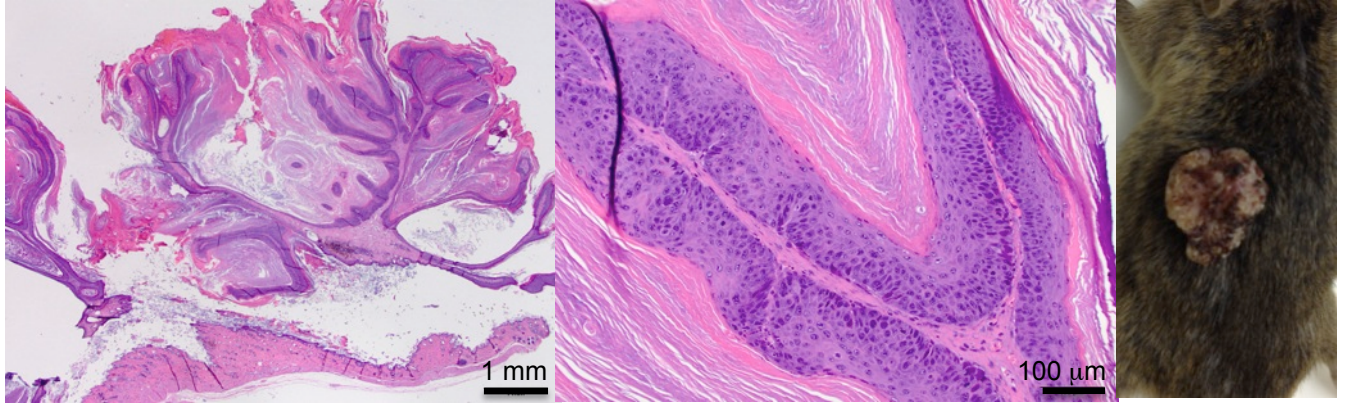

Lesion #64 & 65: ulceration with moderate neutrophilic and histiocytic dermatitis and weak signs of epidermal hyperplasia

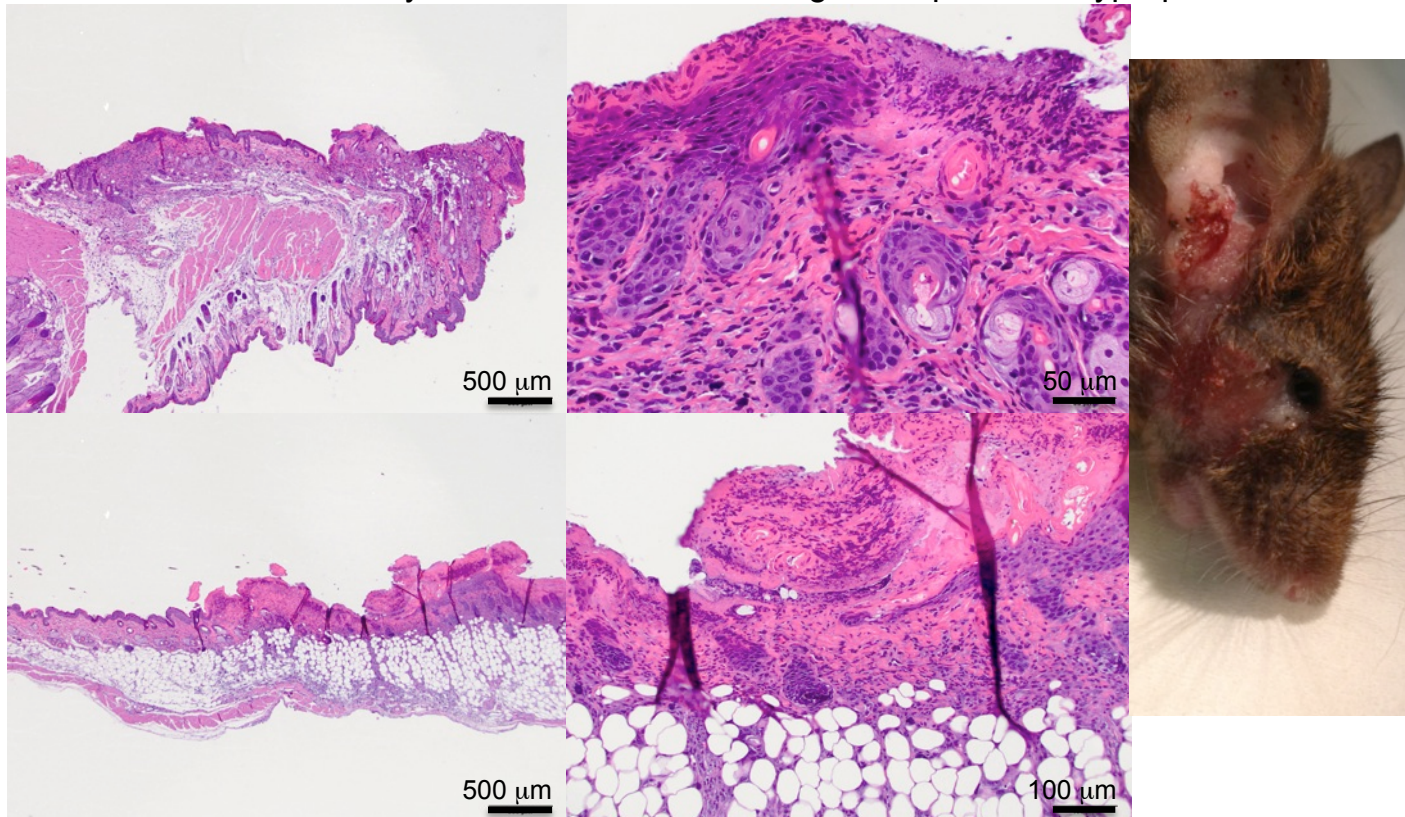

Figure S5

**A**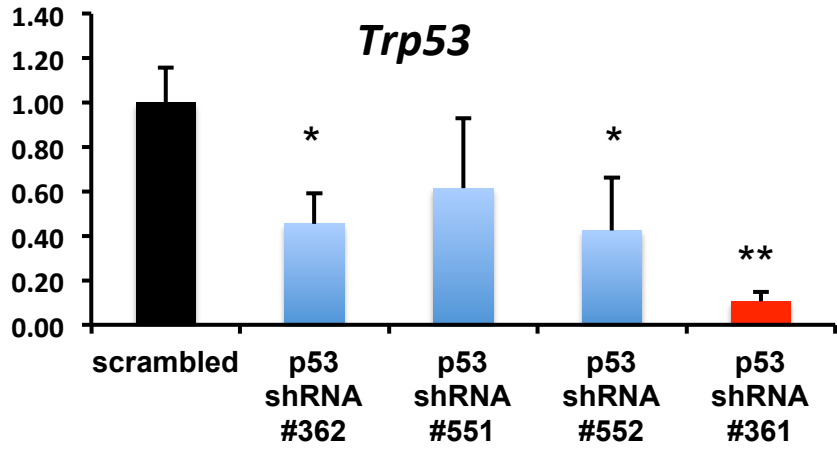**B**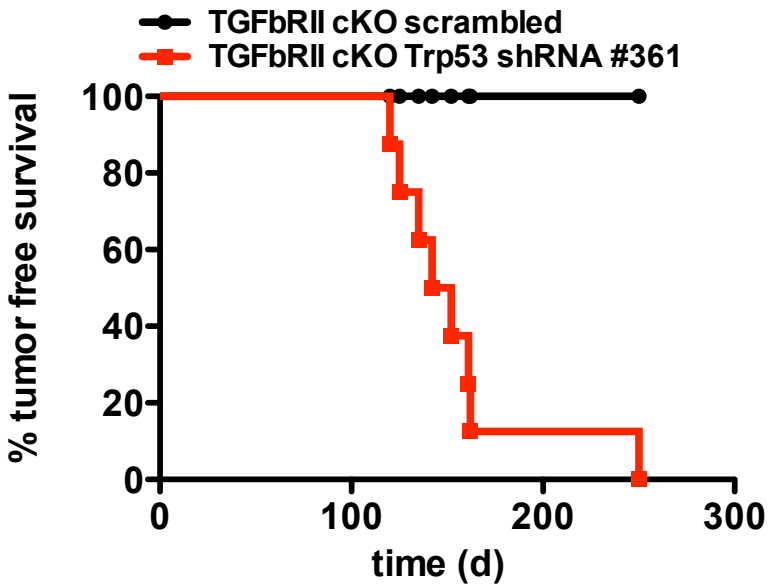**Figure S6**

**A**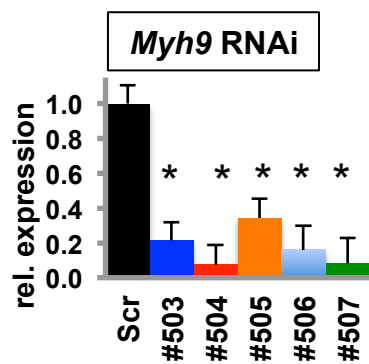**B**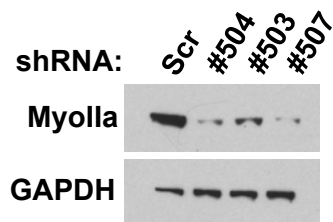**C**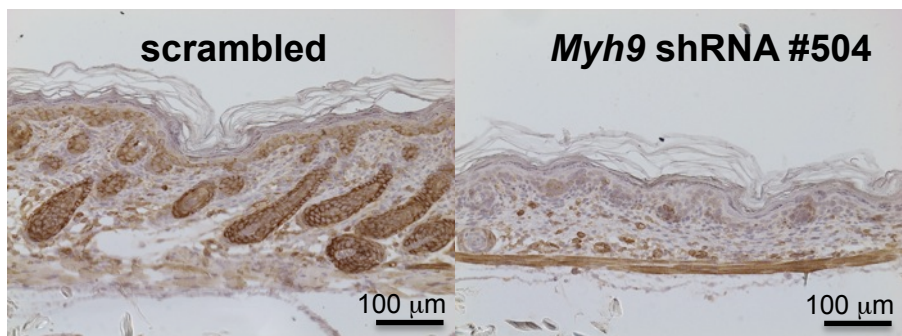**D**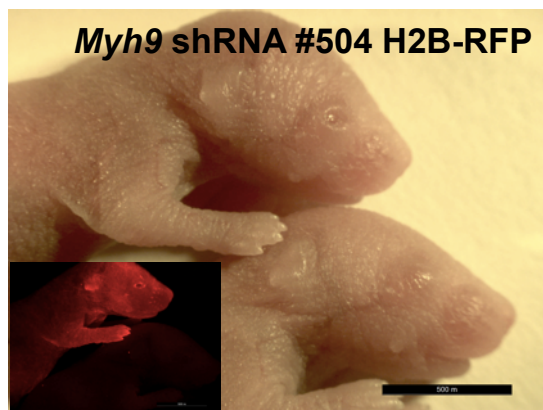**E**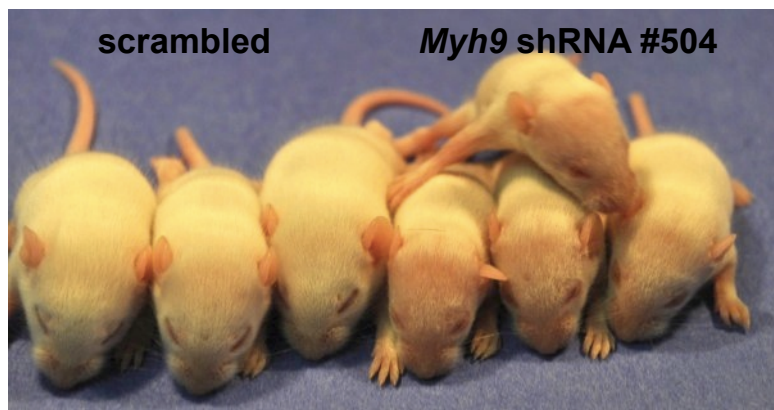**Figure S7**

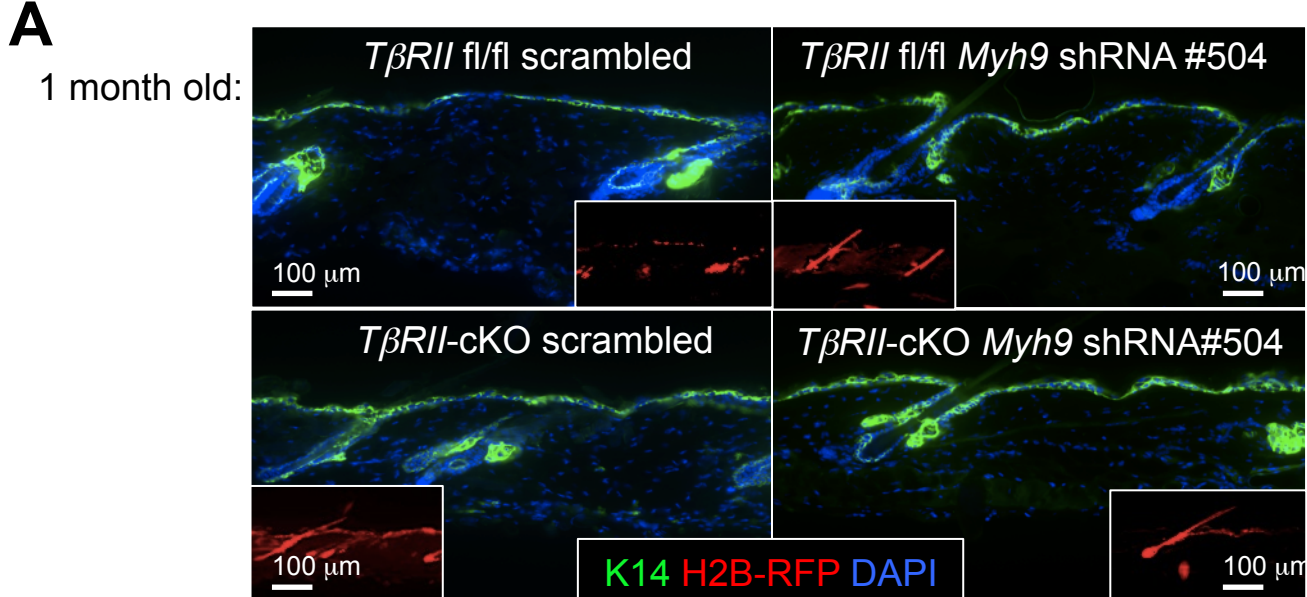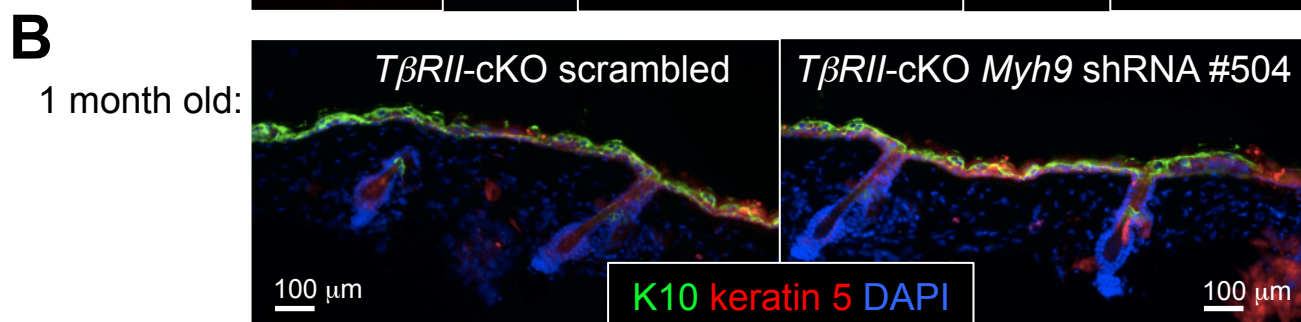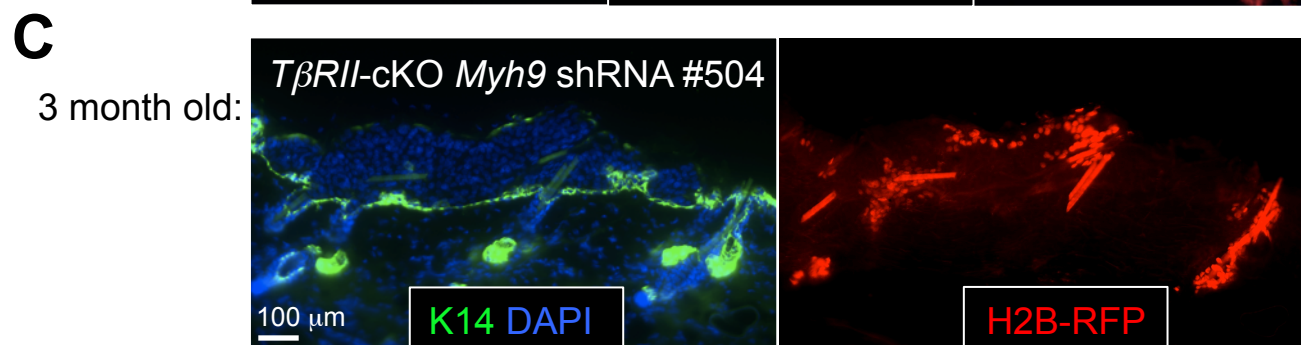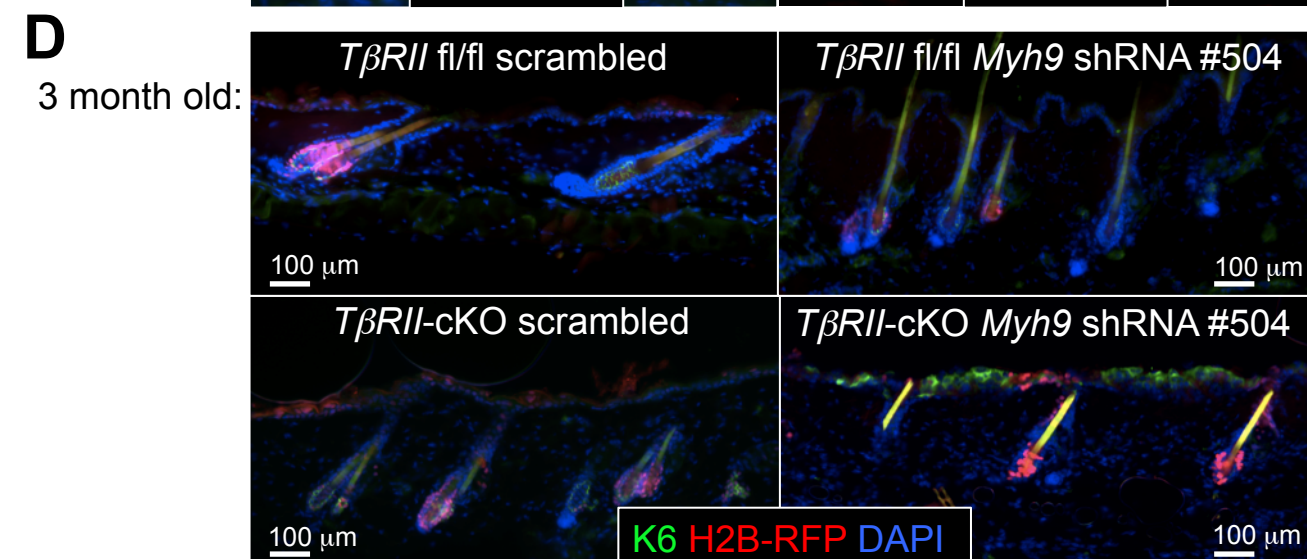

**Figure S8**



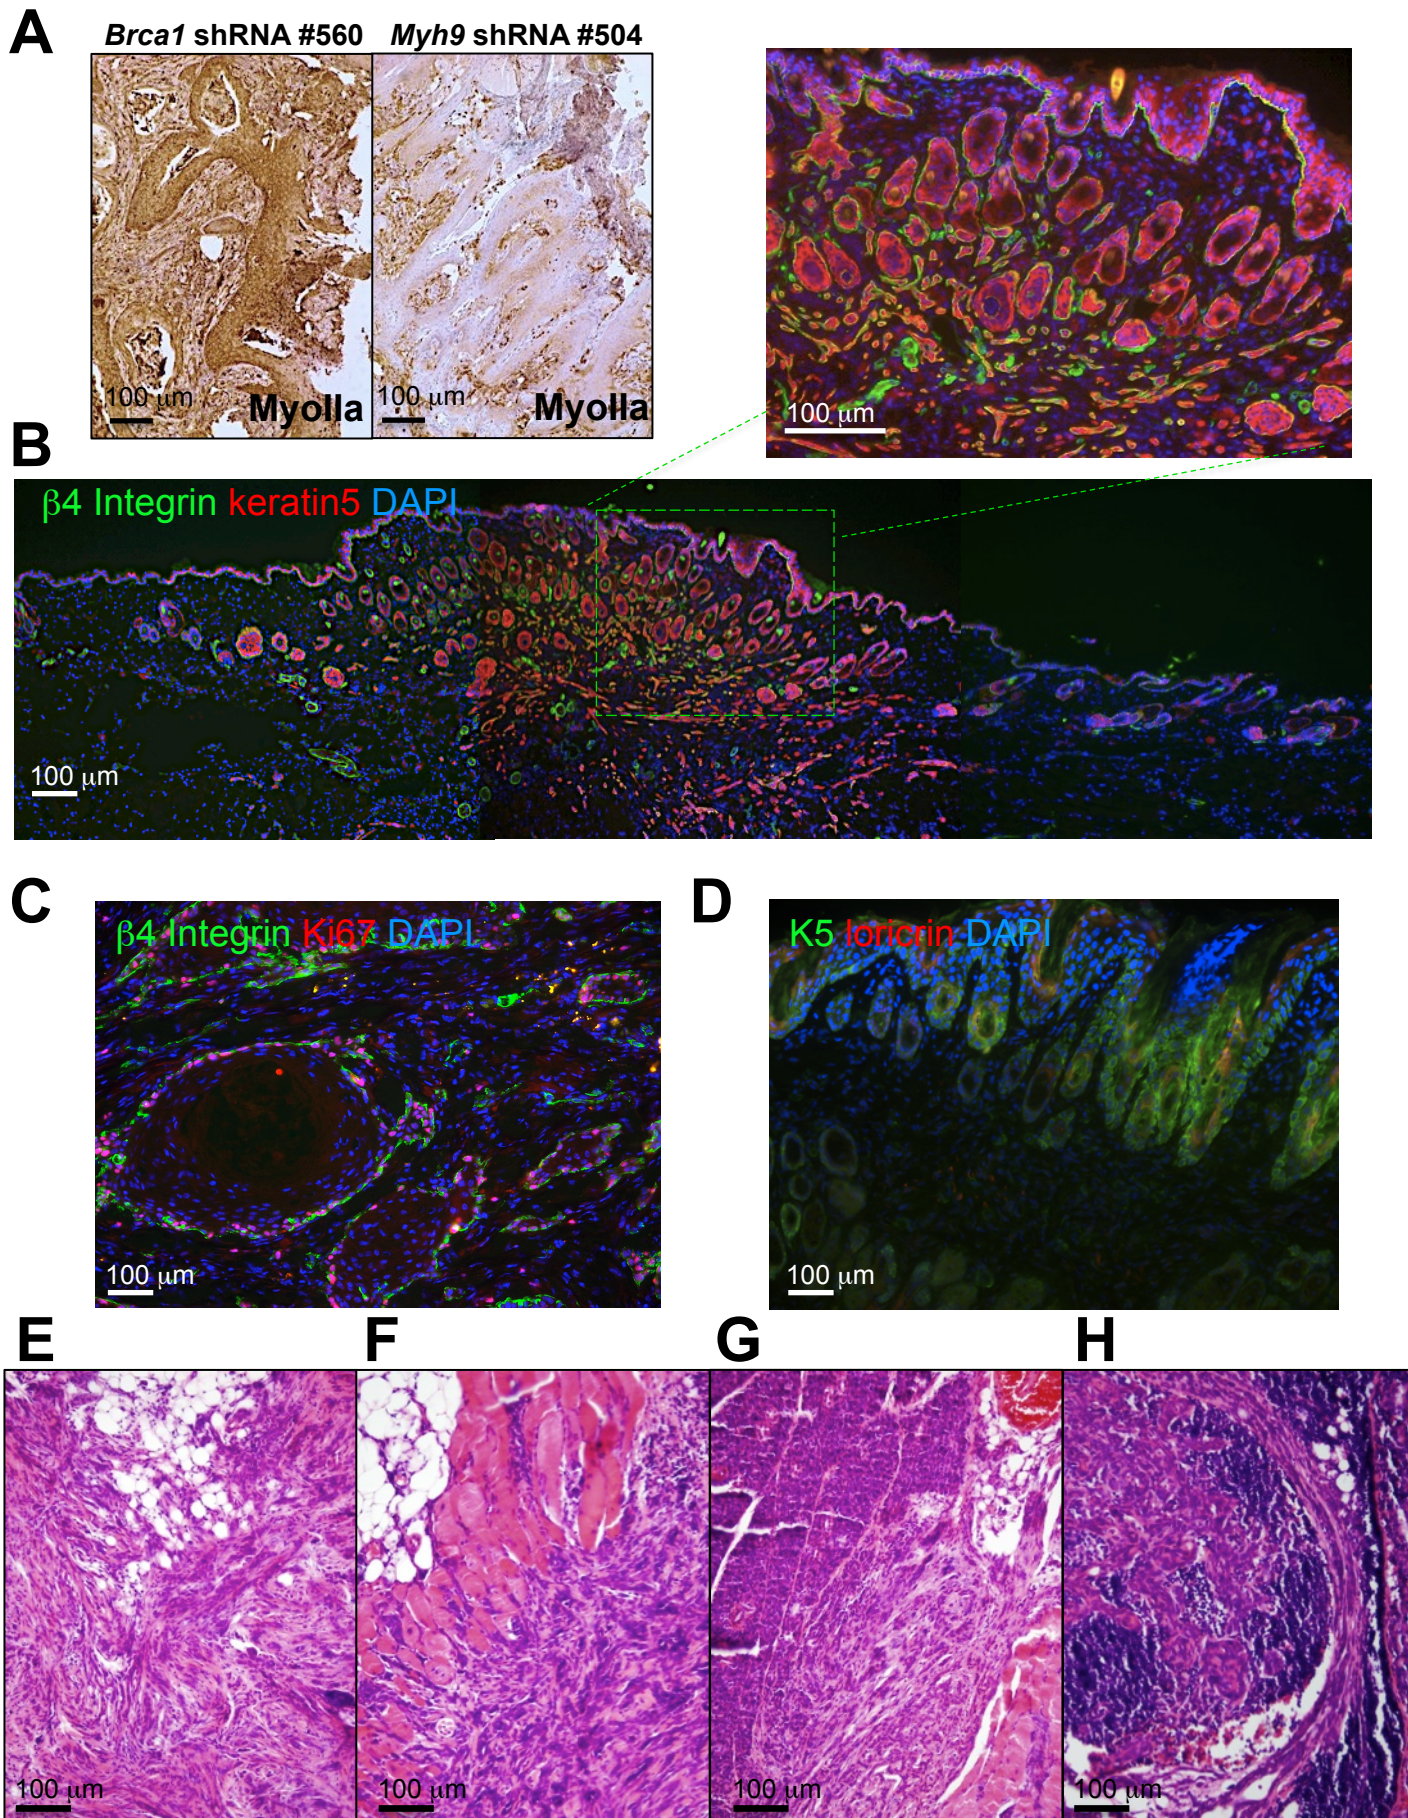

**Figure S9**

**A**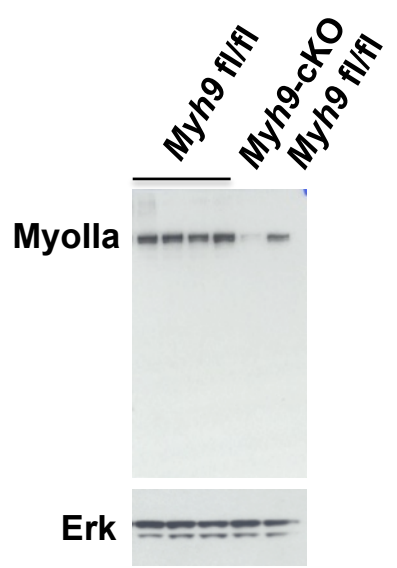**B**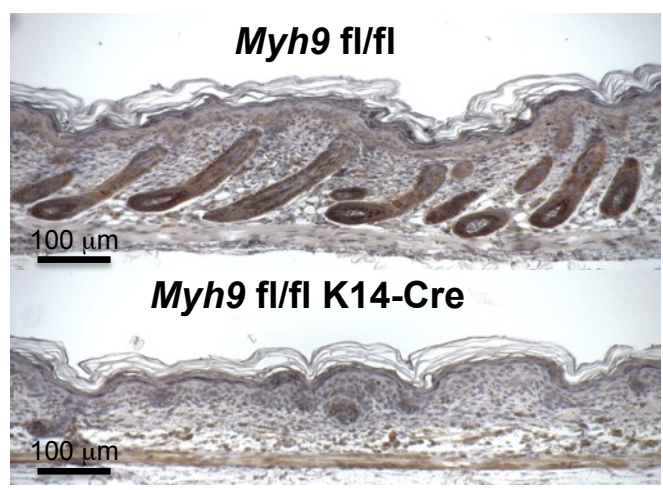**C**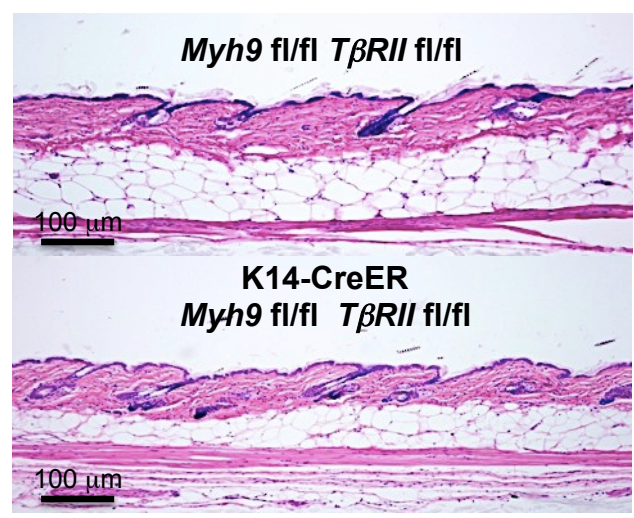**D**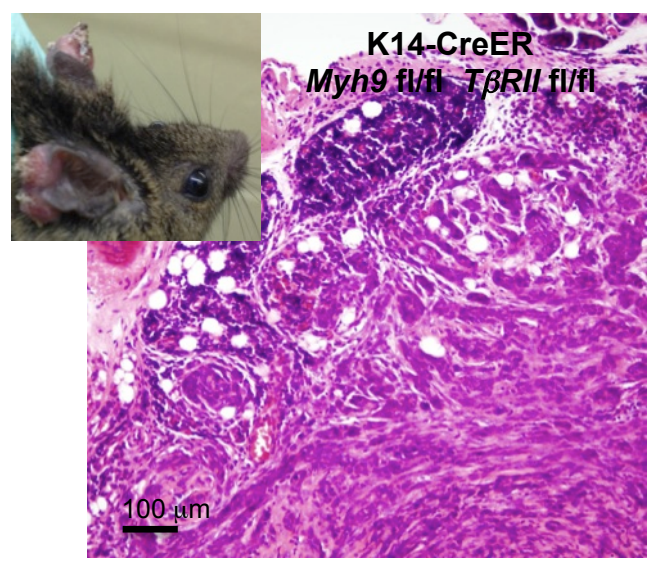**E**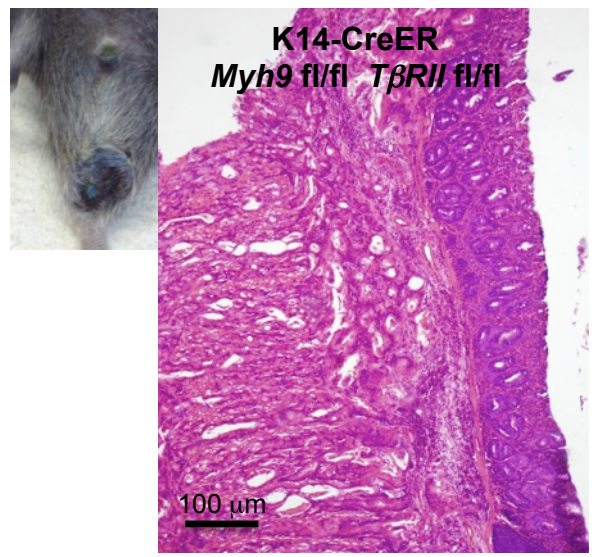**Figure S10**

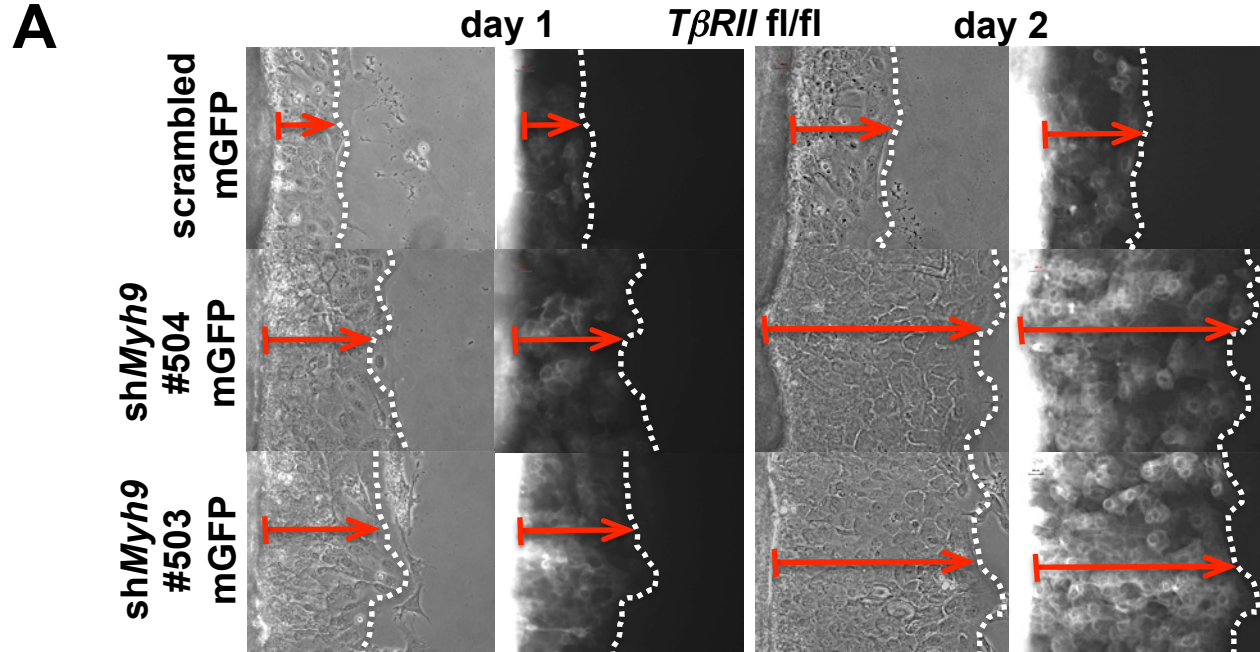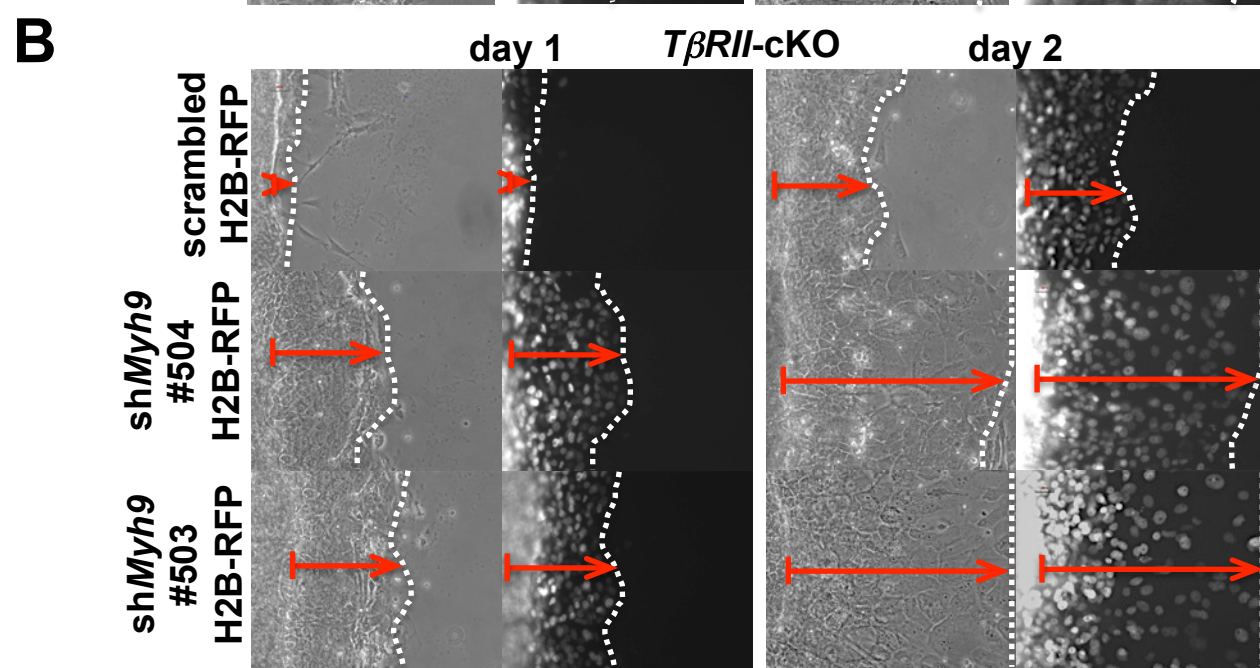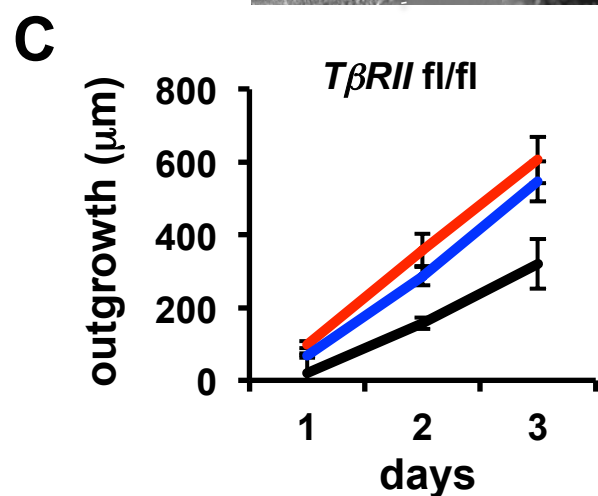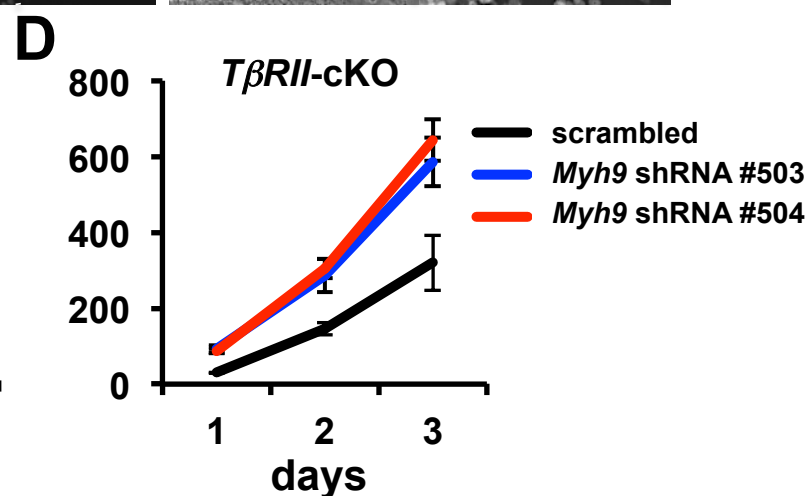

**Figure S11**

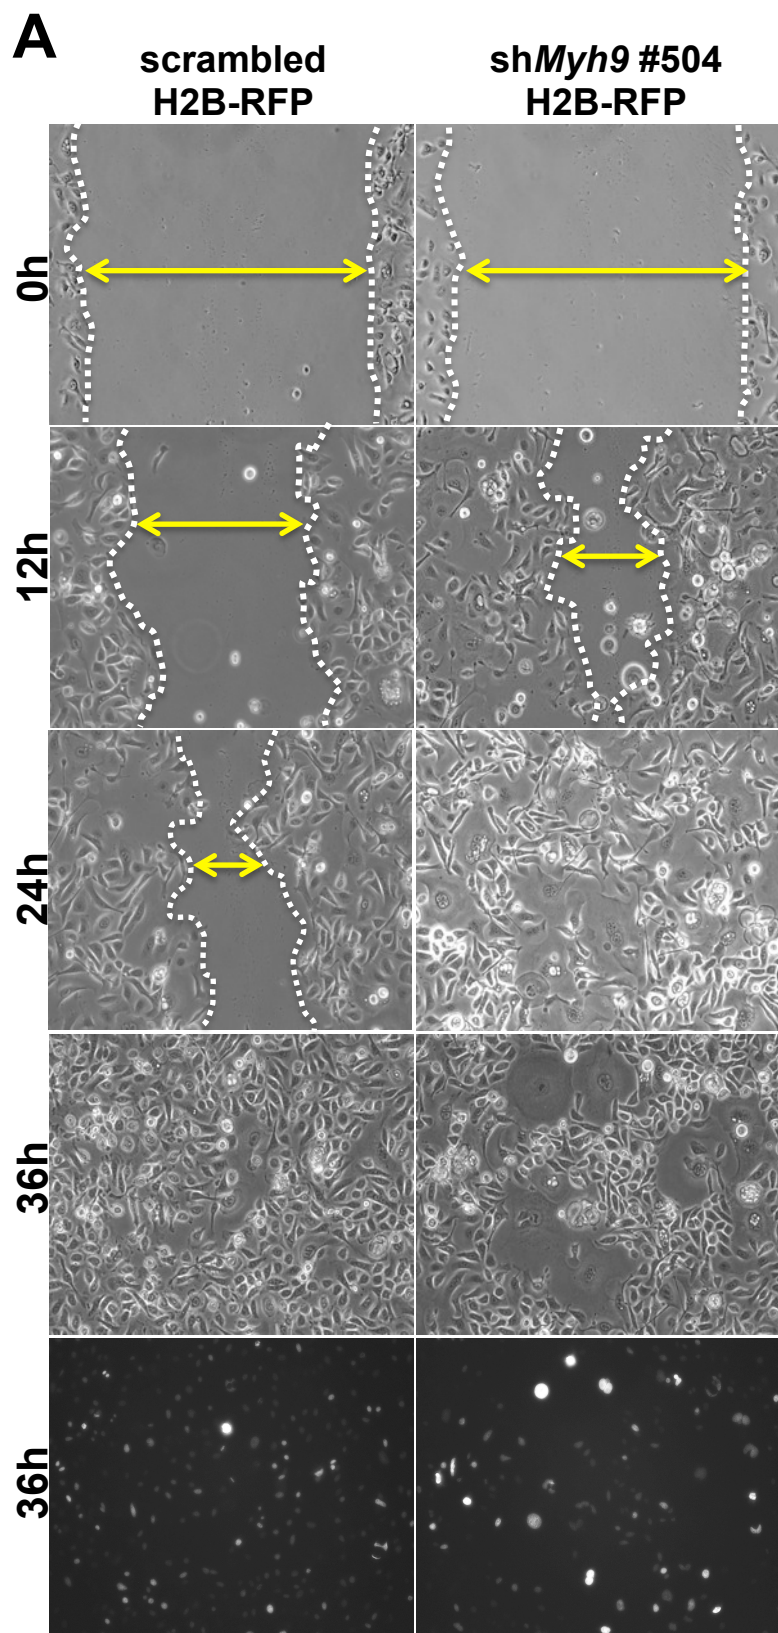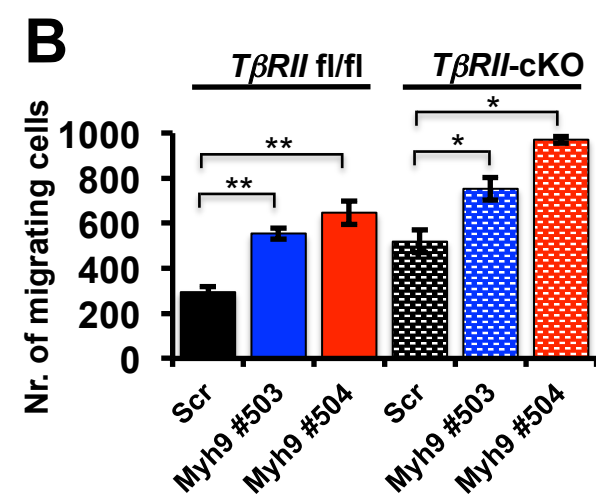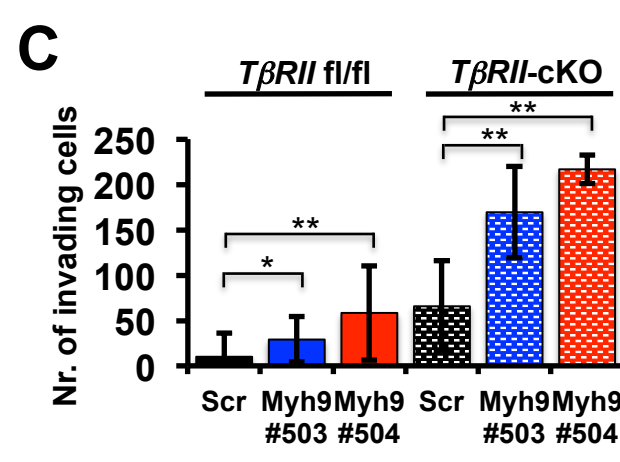

**Figure S12**

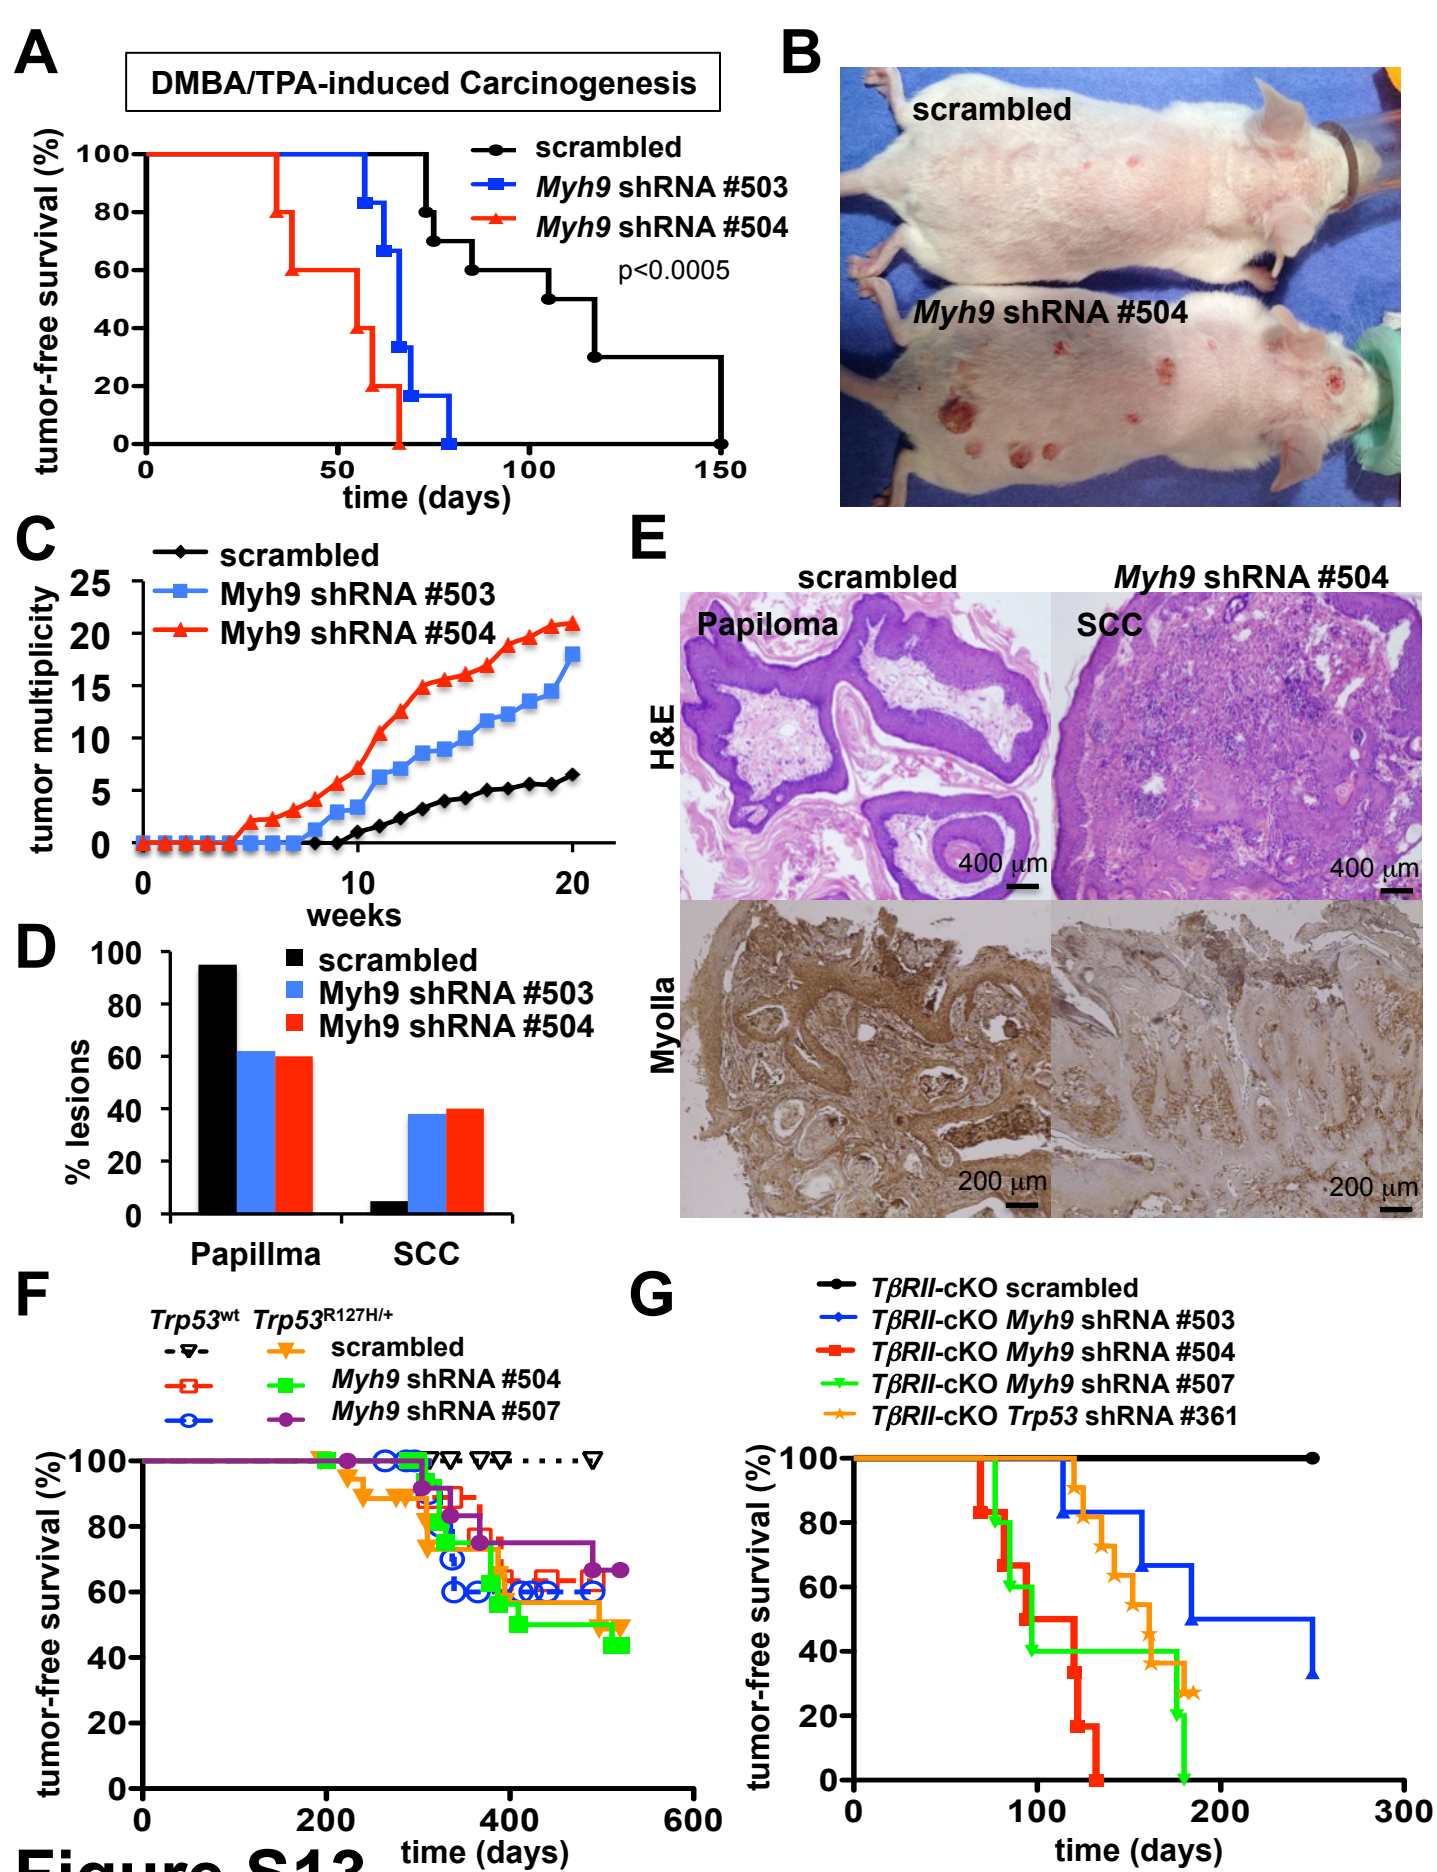

**Figure S13**

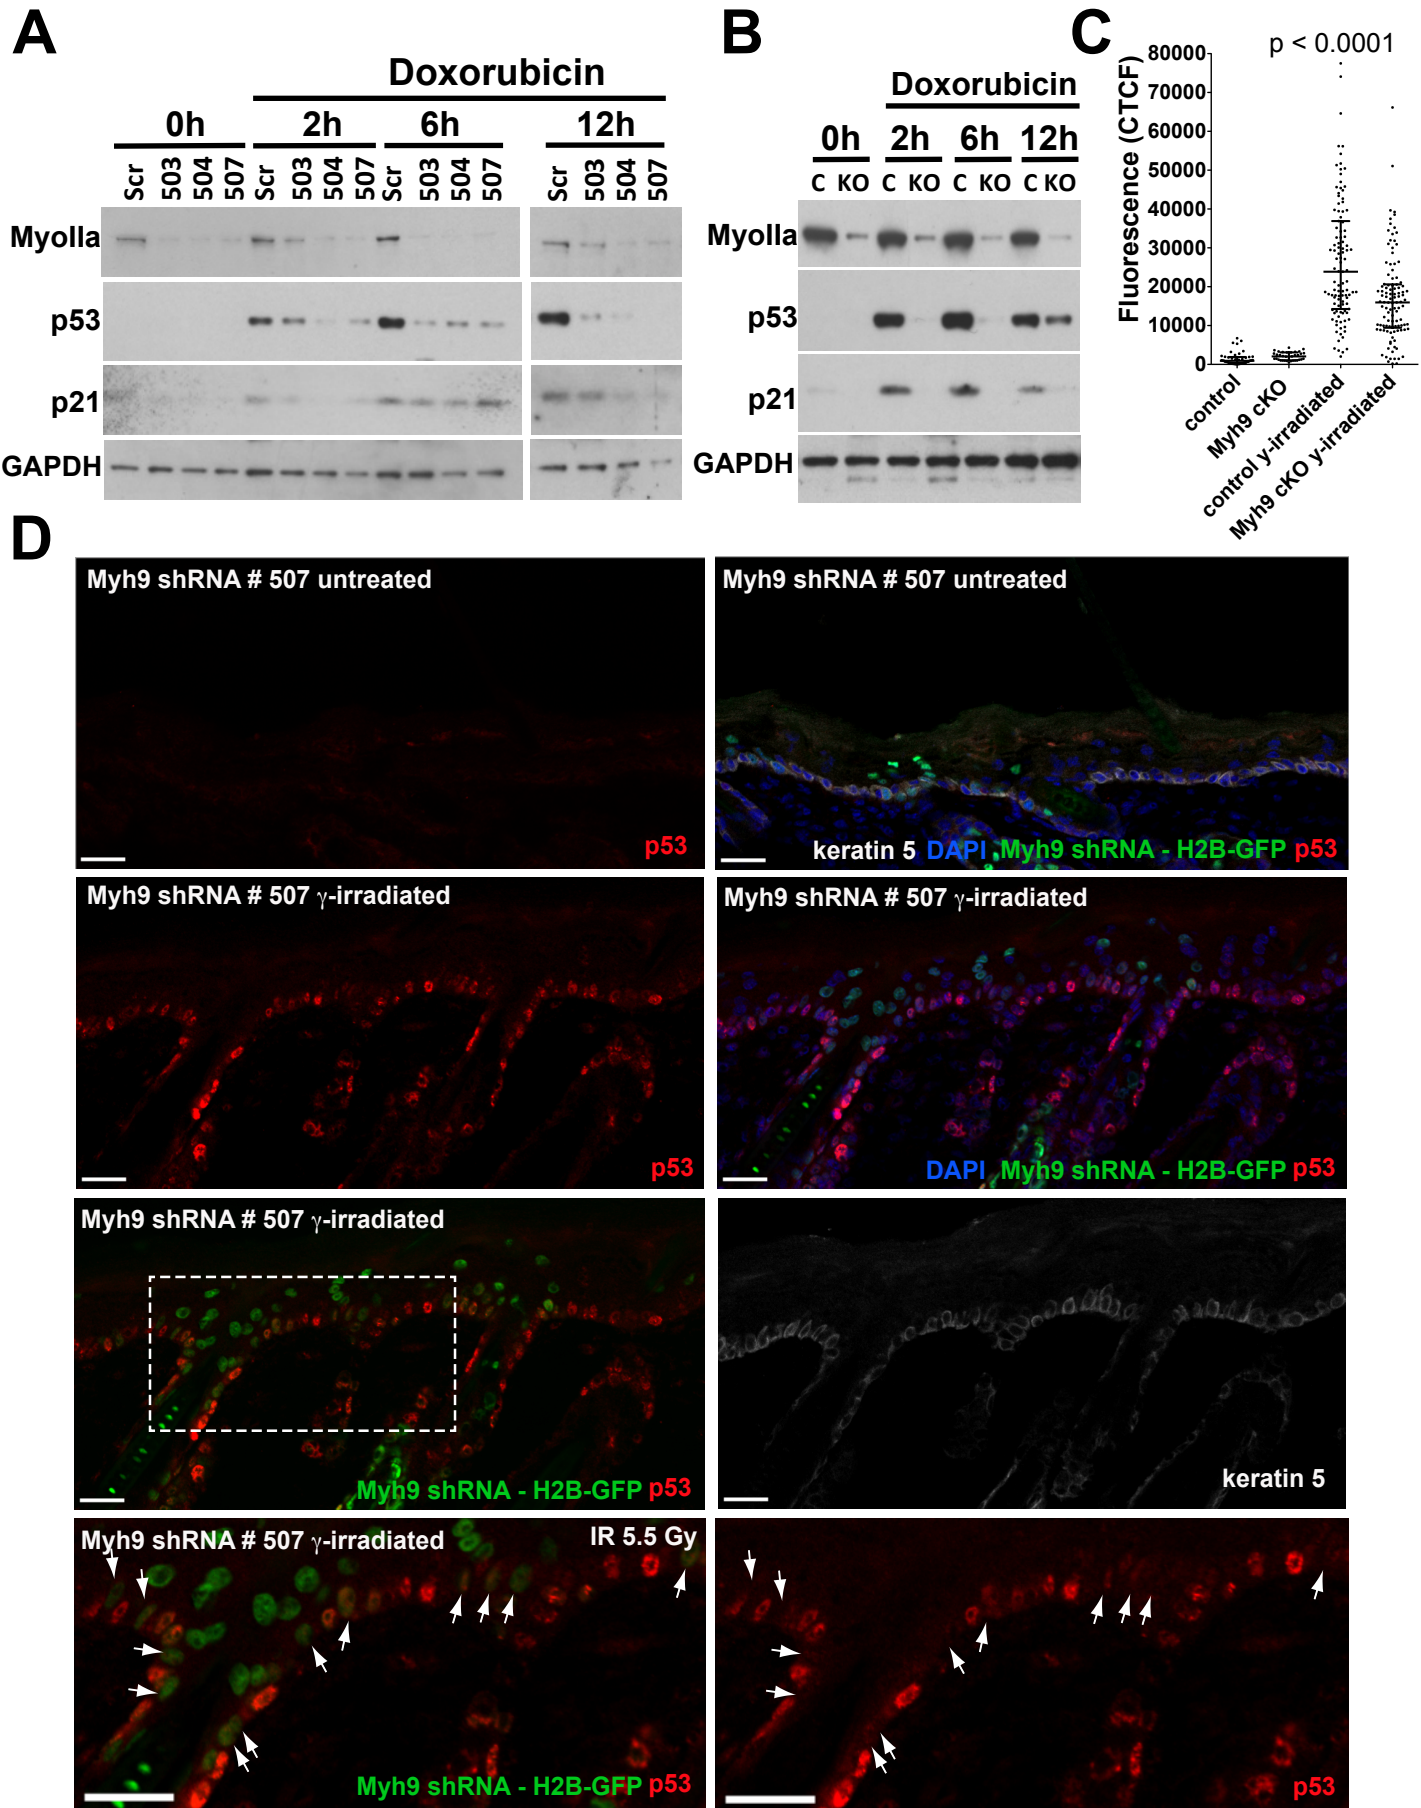

**Figure S14**

**A**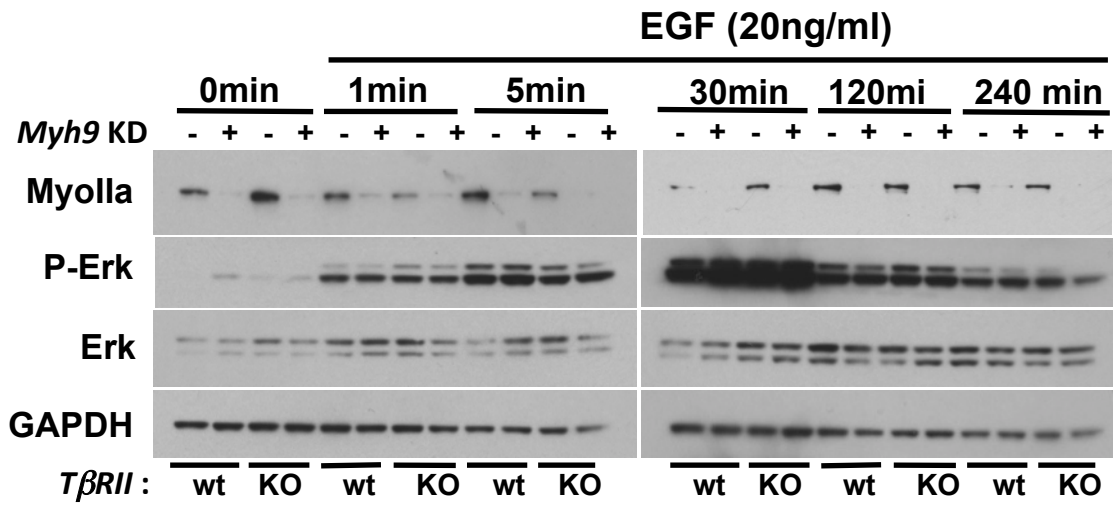**Figure S15**

**A**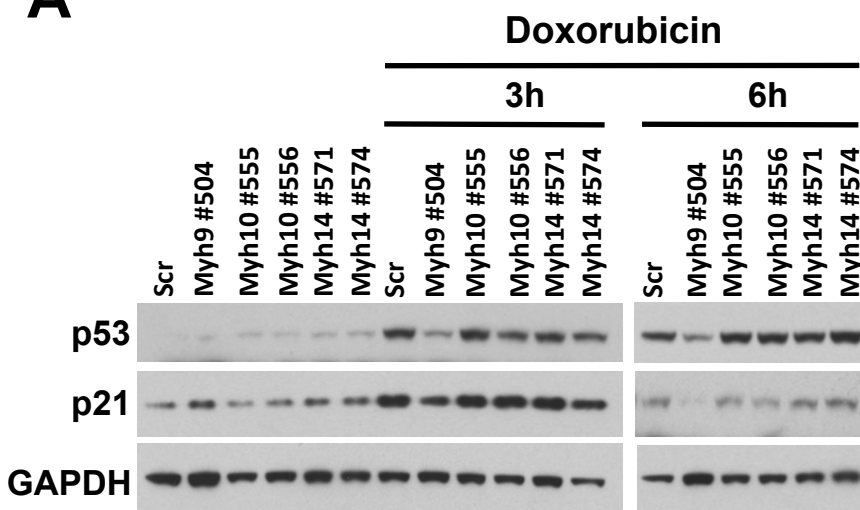**B**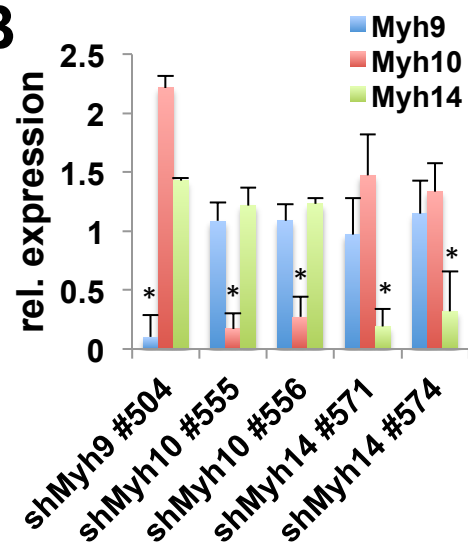**C**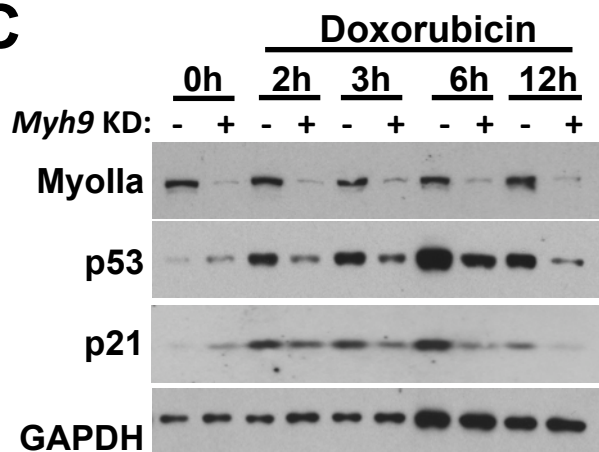**D**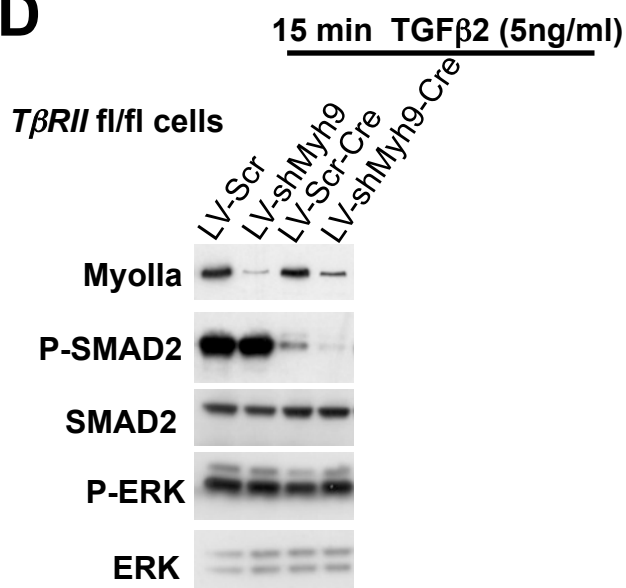**E**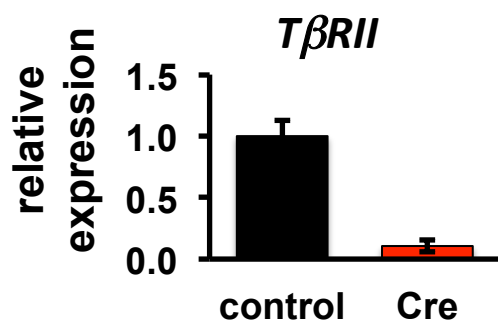



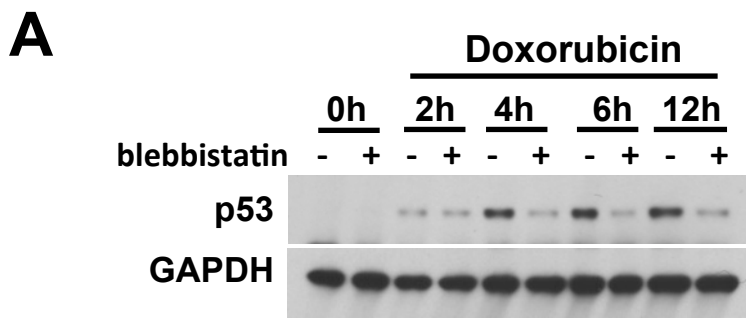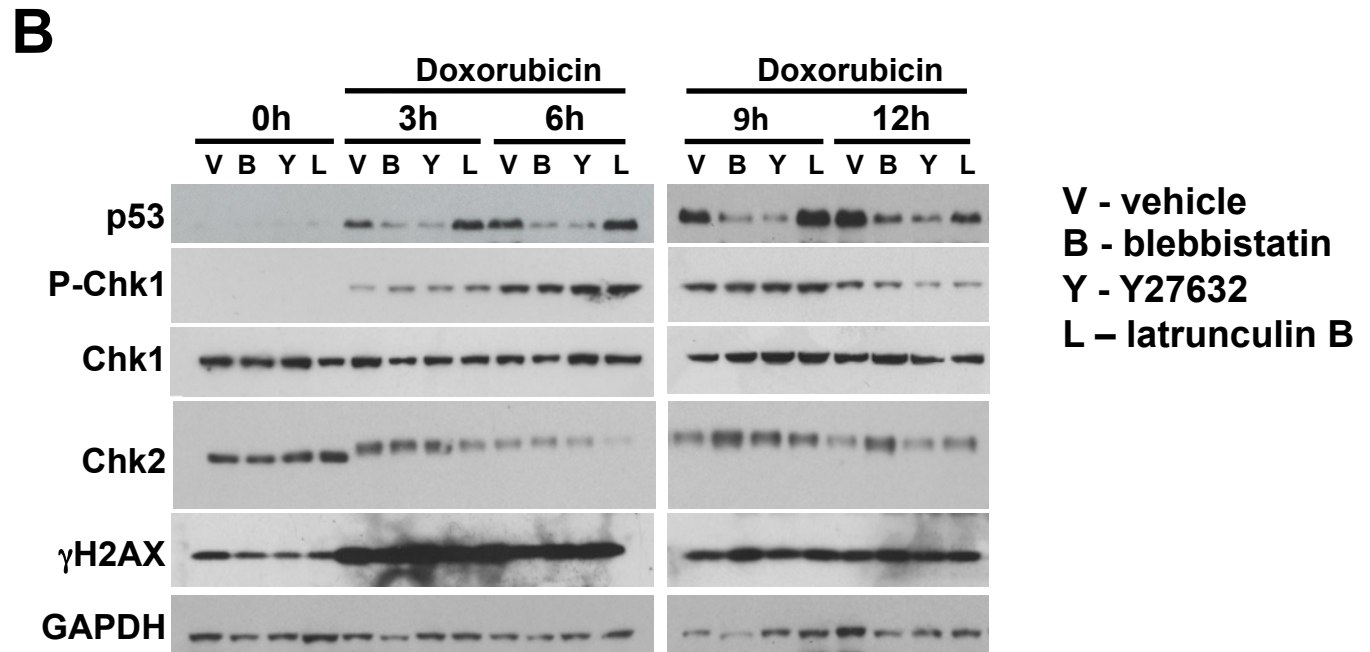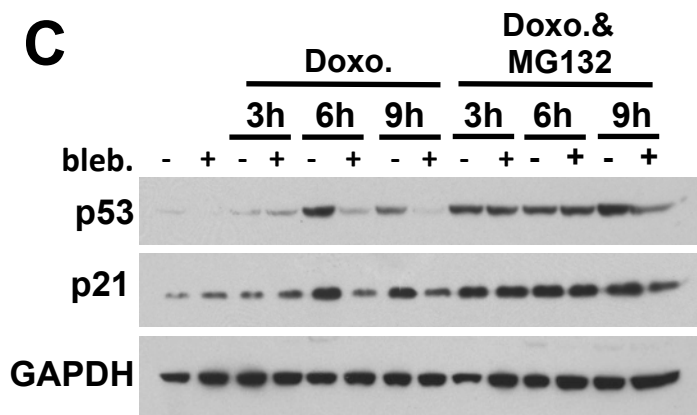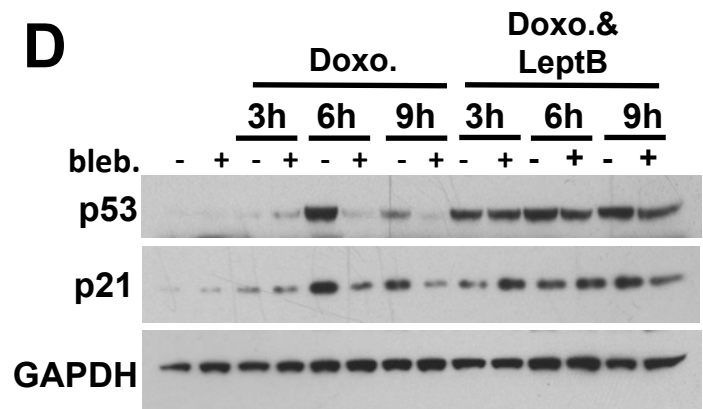

**Figure S17**

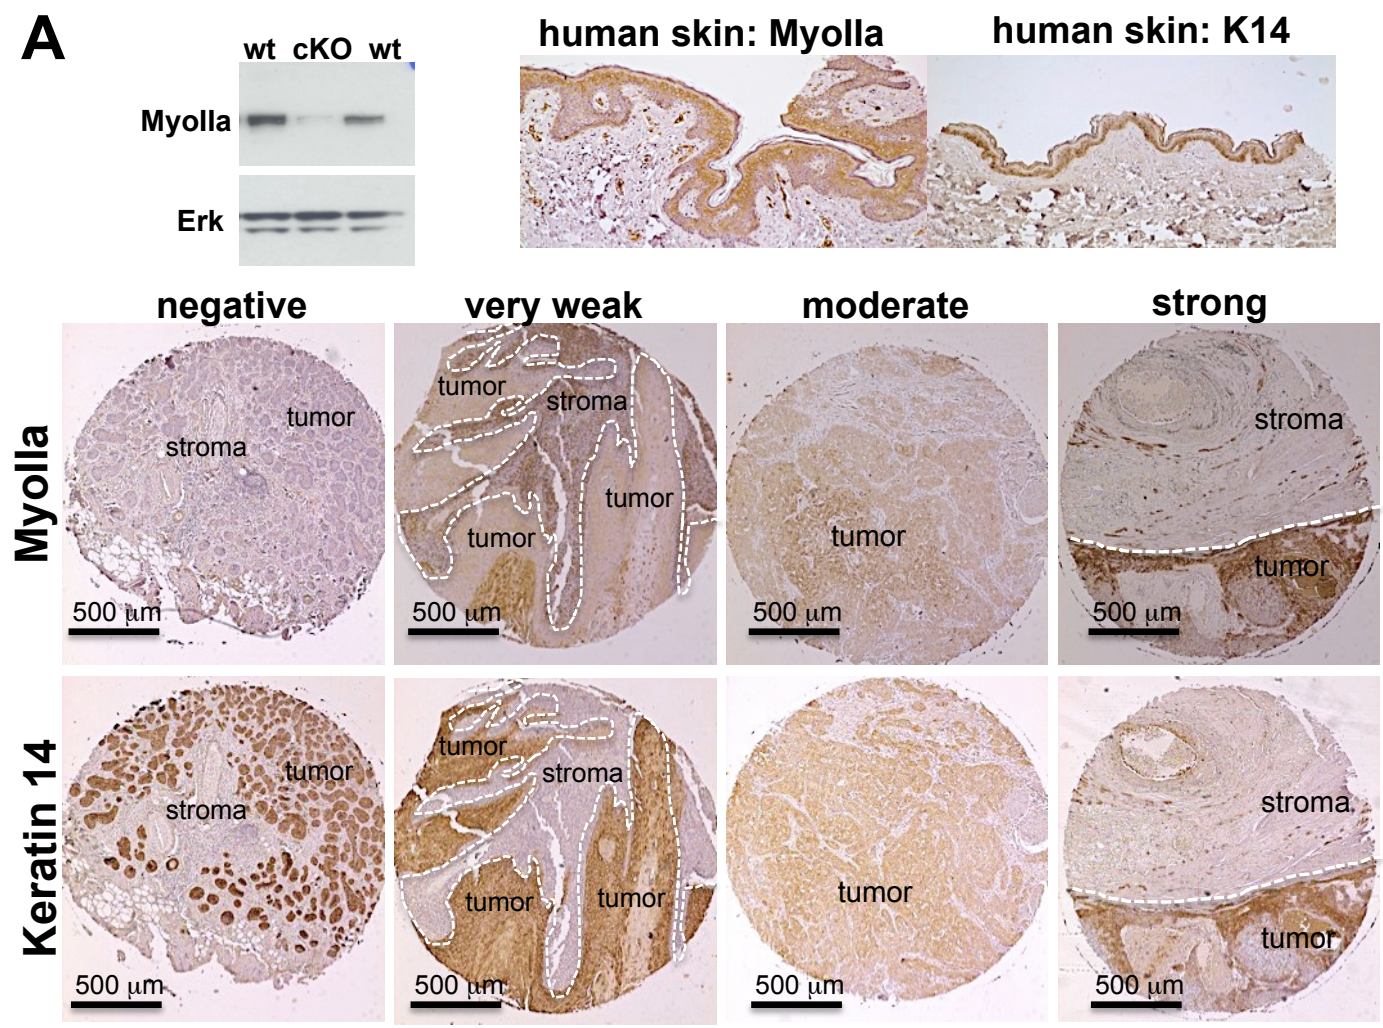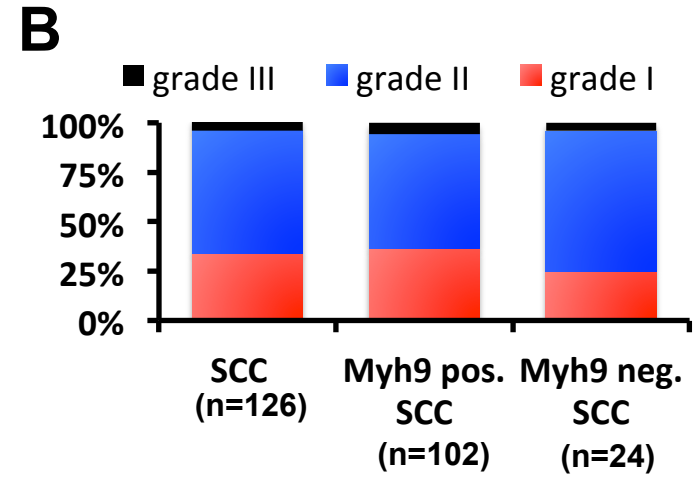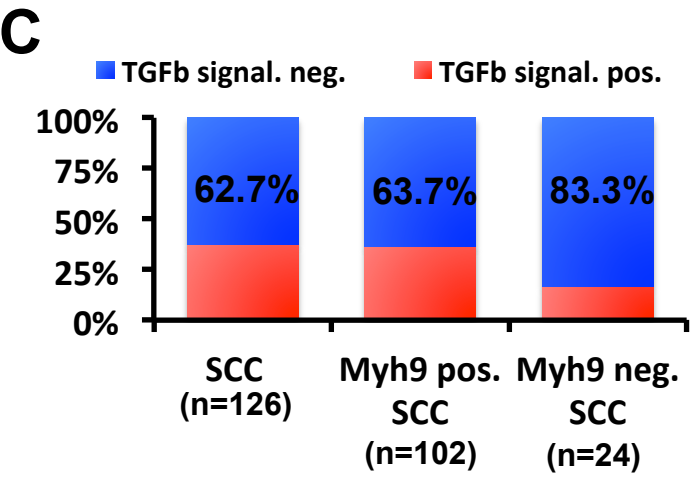

**Figure S18**

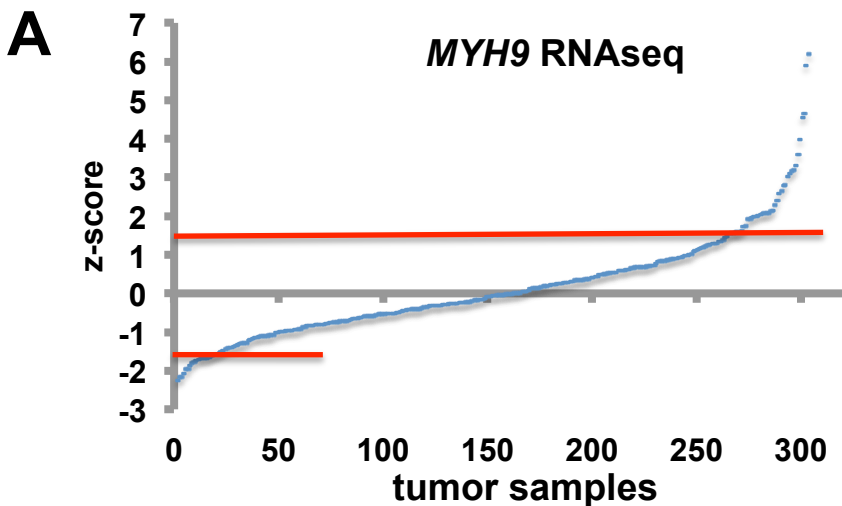

**B** *MYH9* mRNA upregulation:  
altered in 33 cases (11%)

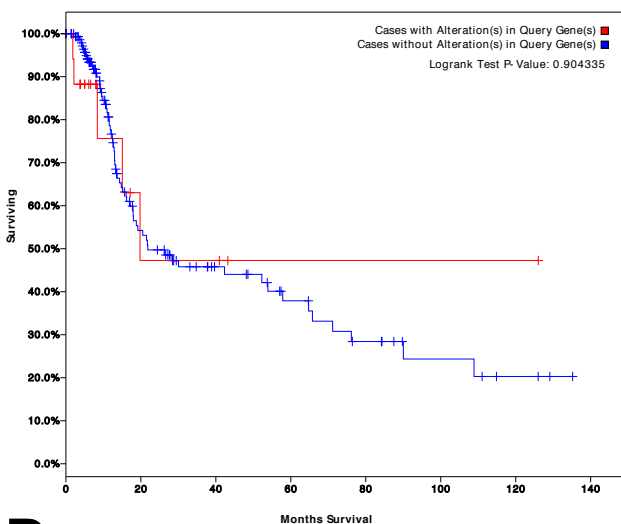

**C** *MYH9* mRNA upregulation, amplifications, gains:  
altered in 82 cases (27%)

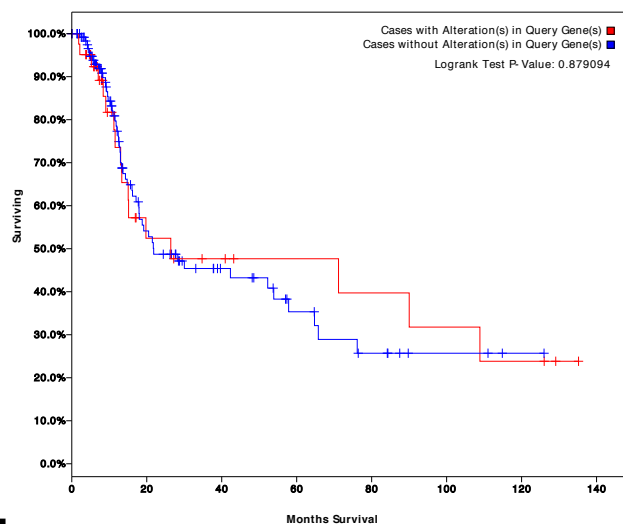

**D** *MYH9* hemizygous loss:  
altered in 45 cases (15%)

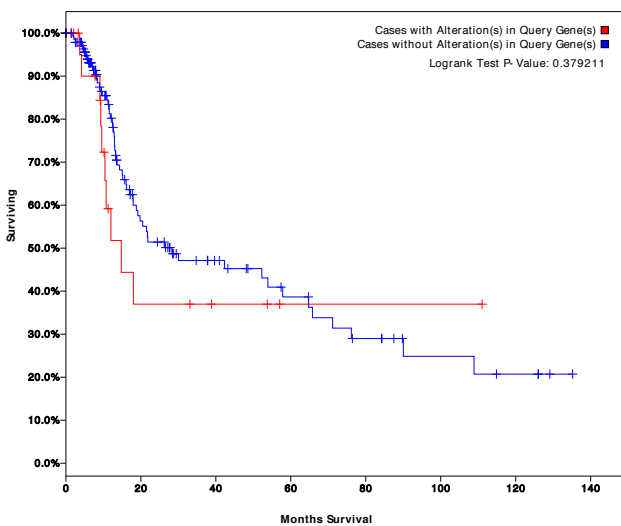

**E** *MYH9* mutations:  
altered in 13 cases (4%)

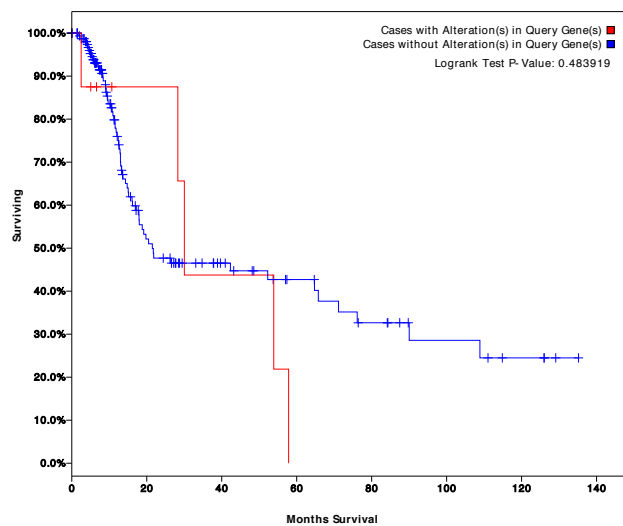

**Figure S19**

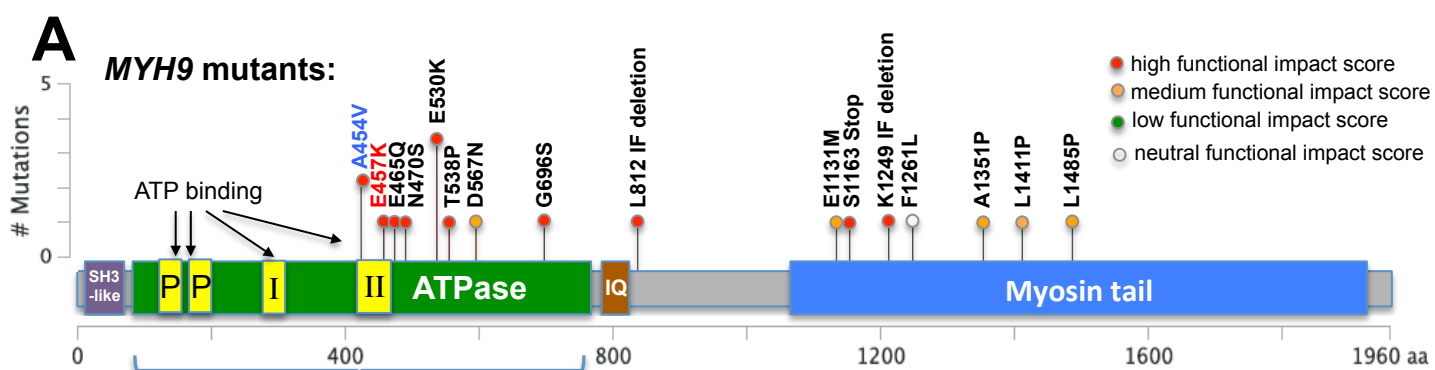

**B**

| Mutation             | AA variant | Gene | MSA | PDB | Func. Impact | FI score |
|----------------------|------------|------|-----|-----|--------------|----------|
| 1 MYH9_HUMAN A454V   | A454V      | MYH9 | msa | pdb | high         | 4.345    |
| 2 MYH9_HUMAN E457K   | E457K      | MYH9 | msa | pdb | high         | 4.97     |
| 3 MYH9_HUMAN E465Q   | E465Q      | MYH9 | msa | pdb | high         | 4.325    |
| 4 MYH9_HUMAN N470S   | N470S      | MYH9 | msa | pdb | high         | 3.84     |
| 5 MYH9_HUMAN E530K   | E530K      | MYH9 | msa | pdb | high         | 4.265    |
| 6 MYH9_HUMAN T538P   | T538P      | MYH9 | msa | pdb | high         | 3.885    |
| 7 MYH9_HUMAN D567N   | D567N      | MYH9 | msa | pdb | medium       | 2.33     |
| 8 MYH9_HUMAN G696S   | G696S      | MYH9 | msa | pdb | high         | 3.67     |
| 9 MYH9_HUMAN L812X   | L812X      | MYH9 | msa | pdb | high         | ↻        |
| 10 MYH9_HUMAN E1131M | E1131M     | MYH9 | msa |     | medium       | 3.5      |
| 11 MYH9_HUMAN S1163X | S1163X     | MYH9 | msa |     | high         | ↻        |
| 12 MYH9_HUMAN K1249E | K1249E     | MYH9 | msa |     | medium       | 2.3      |
| 13 MYH9_HUMAN F1261L | F1261L     | MYH9 | msa |     | neutral      | -0.865   |
| 14 MYH9_HUMAN A1351P | A1351P     | MYH9 | msa |     | medium       | 2.89     |
| 15 MYH9_HUMAN L1411P | L1411P     | MYH9 | msa |     | medium       | 3.455    |
| 16 MYH9_HUMAN L1485P | L1485P     | MYH9 | msa |     | medium       | 3.09     |

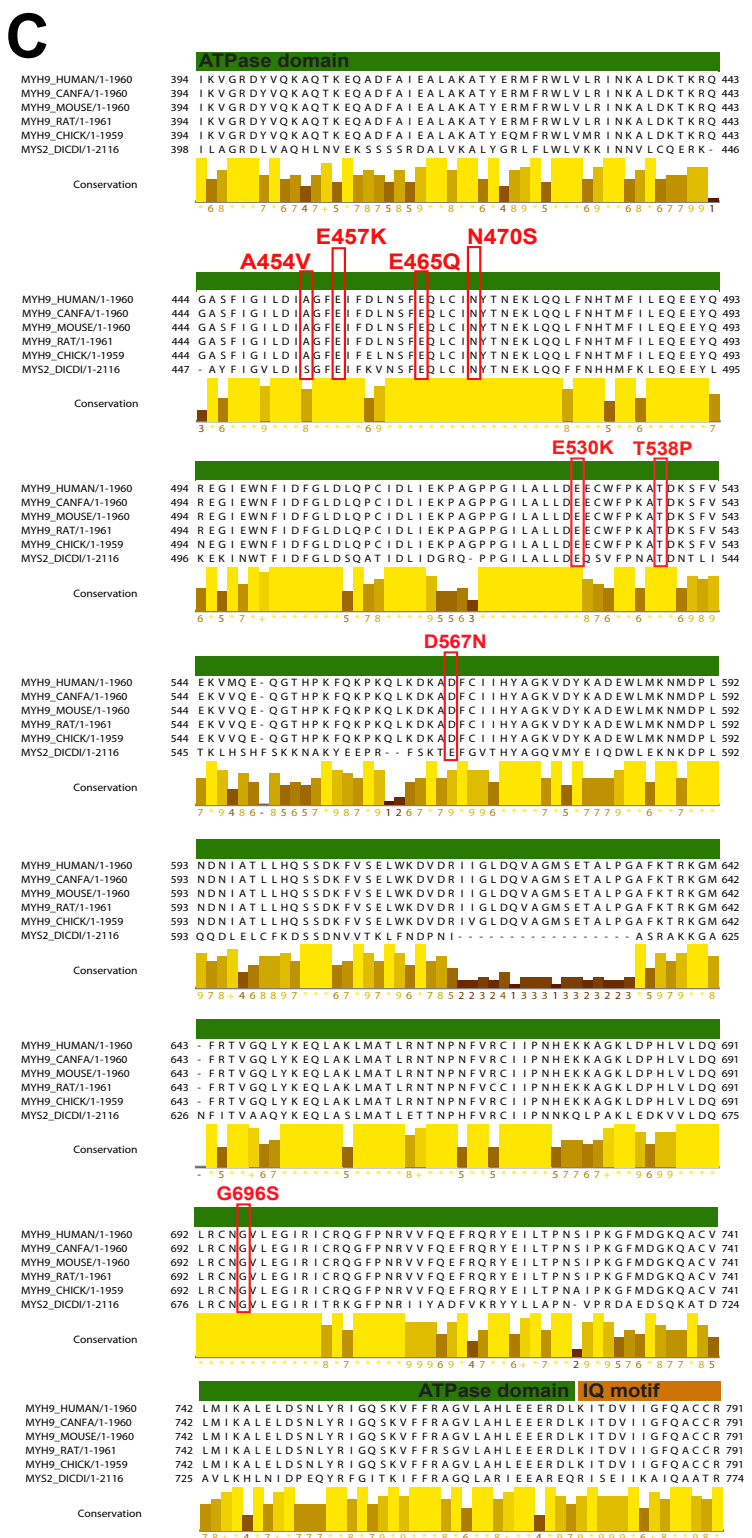

**Figure S20**

**A**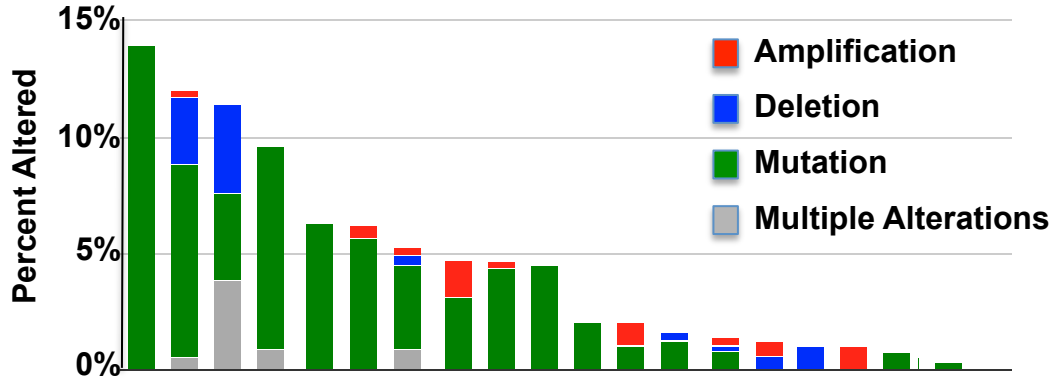**Figure S21**

**A****MYH9 wt****MYH9 mt (E457K)****Phalloidin**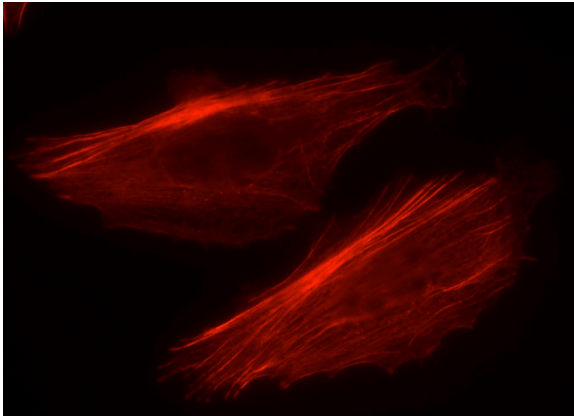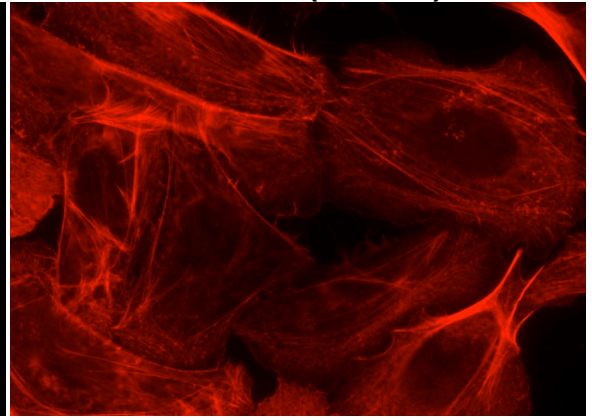**EGFP-Myh9**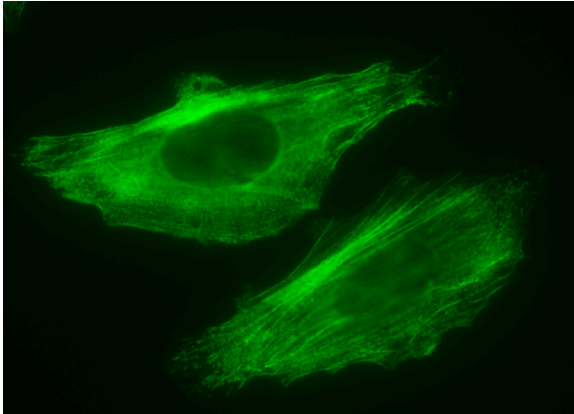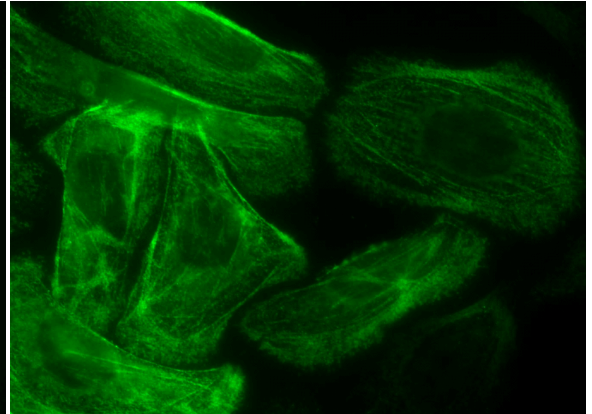**merge**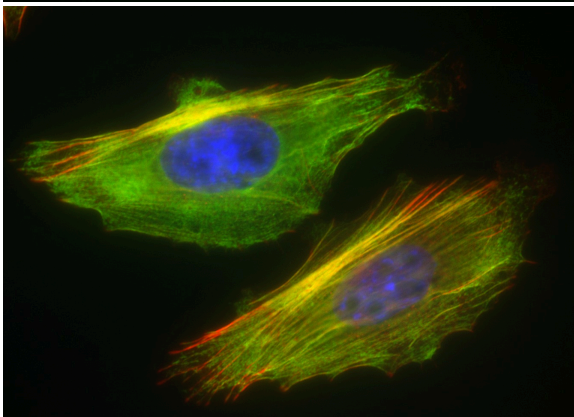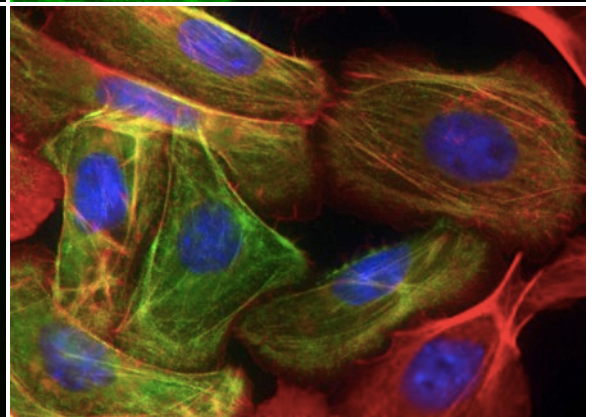**B****Doxorubicin**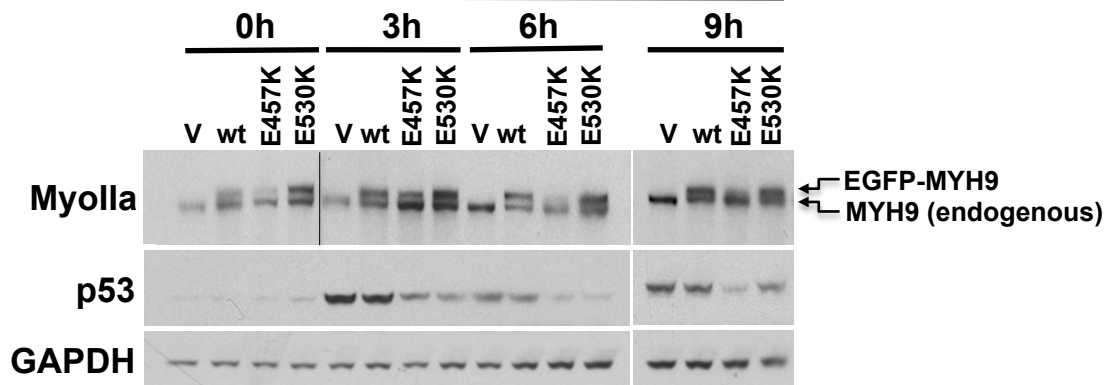**Figure S22**

**A****HNSCC: p53 mutations and p53 inactivating mutations are not mutually exclusive**

Case Set: Sequenced Tumors: All (Next-Gen) sequenced samples (306 samples)

Altered in 222 (73%) of cases

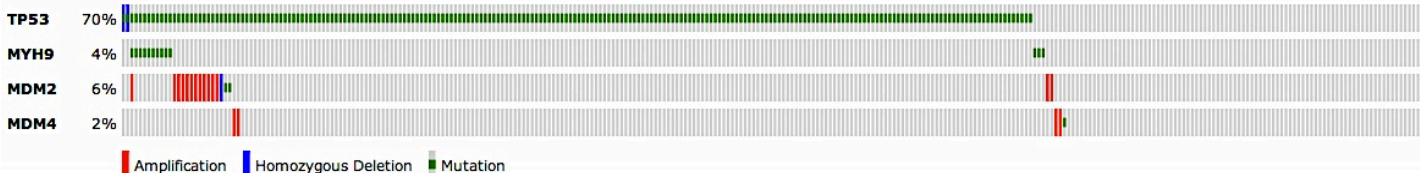

| Gene | TP53 | MDM2     | MYH9     | MDM4     | Legend                                                            |
|------|------|----------|----------|----------|-------------------------------------------------------------------|
| TP53 | ---  | 0.070863 | 0.415401 | 0.162199 | Strong tendency towards mutual exclusivity (0 < Odds Ratio < 0.1) |
| MDM2 |      | ---      | 0.531626 | 0.749961 | Some tendency towards mutual exclusivity (0.1 < Odds Ratio < 0.5) |
| MYH9 |      |          | ---      | 0.803702 | No association (0.5 < Odds Ratio < 2)                             |
| MDM4 |      |          |          | ---      | Tendency toward co-occurrence (2 < Odds Ratio < 10)               |
|      |      |          |          |          | Strong tendency towards co-occurrence (Odds Ratio > 10)           |
|      |      |          |          |          | No events recorded for one or both genes                          |

**B****Glioblastoma: p53 mutations and p53 inactivating mutations are mutually exclusive**

Case Set: Sequenced Tumors: All (Next-Gen) sequenced samples (283 samples)

Altered in 125 (44%) of cases

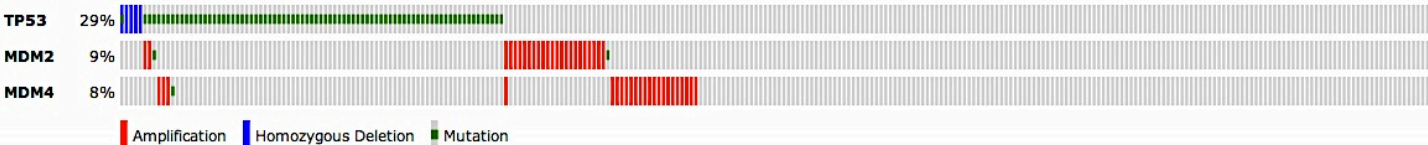

| Gene | TP53 | MDM2     | MDM4     | Legend                                                            |
|------|------|----------|----------|-------------------------------------------------------------------|
| TP53 | ---  | 0.025041 | 0.114155 | Strong tendency towards mutual exclusivity (0 < Odds Ratio < 0.1) |
| MDM2 |      | ---      | 0.326795 | Some tendency towards mutual exclusivity (0.1 < Odds Ratio < 0.5) |
| MDM4 |      |          | ---      | No association (0.5 < Odds Ratio < 2)                             |
|      |      |          |          | Tendency toward co-occurrence (2 < Odds Ratio < 10)               |
|      |      |          |          | Strong tendency towards co-occurrence (Odds Ratio > 10)           |
|      |      |          |          | No events recorded for one or both genes                          |

p-values < 0.05, as derived via Fisher's Exact test are outlined in red.  
p-values are not adjusted for FDR.

**Table S1.** Genes and shRNA construct included in the shRNA library

| Gene | Construct | Clone          | gene          |    |     |                |          |
|------|-----------|----------------|---------------|----|-----|----------------|----------|
| 1    | 1         | TRCN0000179370 | 1500026B10Rik | 14 | 64  | TRCN0000022614 | Amhr2    |
|      | 2         | TRCN0000179624 | 1500026B10Rik |    | 65  | TRCN0000022615 | Amhr2    |
|      | 3         | TRCN0000179770 | 1500026B10Rik |    | 66  | TRCN0000022616 | Amhr2    |
|      | 4         | TRCN0000184447 | 1500026B10Rik |    | 67  | TRCN0000022617 | Amhr2    |
| 2    | 5         | TRCN0000184474 | 1500026B10Rik |    | 68  | TRCN0000022618 | Amhr2    |
|      | 6         | TRCN0000126479 | 2010107G23Rik | 15 | 69  | TRCN0000090053 | Ank3     |
|      | 7         | TRCN0000126480 | 2010107G23Rik |    | 70  | TRCN0000090054 | Ank3     |
|      | 8         | TRCN0000126481 | 2010107G23Rik |    | 71  | TRCN0000090055 | Ank3     |
|      | 9         | TRCN0000126482 | 2010107G23Rik |    | 72  | TRCN0000090056 | Ank3     |
| 3    | 10        | TRCN0000126483 | 2010107G23Rik |    | 73  | TRCN0000090057 | Ank3     |
|      | 11        | TRCN0000176661 | 2310057J16Rik | 16 | 74  | TRCN0000090263 | Anln     |
|      | 12        | TRCN0000177579 | 2310057J16Rik |    | 75  | TRCN0000090264 | Anln     |
|      | 13        | TRCN0000182145 | 2310057J16Rik |    | 76  | TRCN0000090265 | Anln     |
|      | 14        | TRCN0000182145 | 2310057J16Rik |    | 77  | TRCN0000090266 | Anln     |
| 4    | 15        | TRCN0000182753 | 2310057J16Rik | 17 | 78  | TRCN0000110725 | Anxa3    |
|      | 16        | TRCN0000113435 | Abca6         |    | 79  | TRCN0000110726 | Anxa3    |
|      | 17        | TRCN0000113436 | Abca6         |    | 80  | TRCN0000110727 | Anxa3    |
|      | 18        | TRCN0000113437 | Abca6         |    | 81  | TRCN0000110728 | Anxa3    |
|      | 19        | TRCN0000113438 | Abca6         |    | 82  | TRCN0000110729 | Anxa3    |
| 5    | 20        | TRCN0000113439 | Abca6         | 18 | 83  | TRCN0000012278 | Apaf1    |
|      | 21        | TRCN0000113440 | Abca9         |    | 84  | TRCN0000012280 | Apaf1    |
|      | 22        | TRCN0000113442 | Abca9         |    | 85  | TRCN0000012281 | Apaf1    |
|      | 23        | TRCN0000113443 | Abca9         |    | 86  | TRCN0000012282 | Apaf1    |
| 6    | 24        | TRCN0000113444 | Abca9         | 19 | 87  | TRCN0000026148 | Ar       |
|      | 25        | TRCN0000105260 | Abcd4         |    | 88  | TRCN0000026177 | Ar       |
|      | 26        | TRCN0000105261 | Abcd4         |    | 89  | TRCN0000026189 | Ar       |
|      | 27        | TRCN0000105262 | Abcd4         |    | 90  | TRCN0000026195 | Ar       |
|      | 28        | TRCN0000105263 | Abcd4         |    | 91  | TRCN0000026211 | Ar       |
| 7    | 29        | TRCN0000105264 | Abcd4         | 20 | 92  | TRCN0000022609 | Araf     |
|      | 30        | TRCN0000087968 | Abi3          |    | 93  | TRCN0000022610 | Araf     |
|      | 31        | TRCN0000087969 | Abi3          |    | 94  | TRCN0000022611 | Araf     |
|      | 32        | TRCN0000087970 | Abi3          |    | 95  | TRCN0000022612 | Araf     |
|      | 33        | TRCN0000087971 | Abi3          |    | 96  | TRCN0000022613 | Araf     |
|      | 34        | TRCN0000087972 | Abi3          | 21 | 97  | TRCN0000109960 | Arhgef12 |
| 8    | 35        | TRCN0000022604 | Acvr1c        |    | 98  | TRCN0000109961 | Arhgef12 |
|      | 36        | TRCN0000022605 | Acvr1c        |    | 99  | TRCN0000109962 | Arhgef12 |
|      | 37        | TRCN0000022606 | Acvr1c        |    | 100 | TRCN0000109963 | Arhgef12 |
|      | 38        | TRCN0000022607 | Acvr1c        |    | 101 | TRCN0000109964 | Arhgef12 |
|      | 39        | TRCN0000022608 | Acvr1c        | 22 | 102 | TRCN0000075553 | Atf5     |
| 9    | 40        | TRCN0000032274 | Adamts12      |    | 103 | TRCN0000075554 | Atf5     |
|      | 41        | TRCN0000032275 | Adamts12      |    | 104 | TRCN0000075555 | Atf5     |
|      | 42        | TRCN0000032276 | Adamts12      |    | 105 | TRCN0000075556 | Atf5     |
|      | 43        | TRCN0000032277 | Adamts12      |    | 106 | TRCN0000075557 | Atf5     |
|      | 44        | TRCN0000032278 | Adamts12      | 23 | 107 | TRCN0000012643 | Atm      |
| 10   | 45        | TRCN0000114956 | Adcy8         |    | 108 | TRCN0000012644 | Atm      |
|      | 46        | TRCN0000114957 | Adcy8         |    | 109 | TRCN0000012645 | Atm      |
|      | 47        | TRCN0000114958 | Adcy8         |    | 110 | TRCN0000012646 | Atm      |
|      | 48        | TRCN0000114959 | Adcy8         |    | 111 | TRCN0000012647 | Atm      |
|      | 49        | TRCN0000114960 | Adcy8         | 24 | 112 | TRCN0000101520 | Atp10d   |
| 11   | 50        | TRCN0000086608 | Aff3          |    | 113 | TRCN0000101521 | Atp10d   |
|      | 51        | TRCN0000086609 | Aff3          |    | 114 | TRCN0000101522 | Atp10d   |
|      | 52        | TRCN0000086610 | Aff3          |    | 115 | TRCN0000101523 | Atp10d   |
|      | 53        | TRCN0000086612 | Aff3          | 25 | 116 | TRCN0000115396 | Azin1    |
| 12   | 54        | TRCN0000071348 | Ahctf1        |    | 117 | TRCN0000115397 | Azin1    |
|      | 55        | TRCN0000071349 | Ahctf1        |    | 118 | TRCN0000115398 | Azin1    |
|      | 56        | TRCN0000071350 | Ahctf1        |    | 119 | TRCN0000115399 | Azin1    |
|      | 57        | TRCN0000071351 | Ahctf1        |    | 120 | TRCN0000115400 | Azin1    |
|      | 58        | TRCN0000071352 | Ahctf1        | 26 | 121 | TRCN0000070508 | Barx2    |
| 13   | 59        | TRCN0000101420 | Allc          |    | 122 | TRCN0000070509 | Barx2    |
|      | 60        | TRCN0000101421 | Allc          |    | 123 | TRCN0000070510 | Barx2    |
|      | 61        | TRCN0000101422 | Allc          |    | 124 | TRCN0000070511 | Barx2    |
|      | 62        | TRCN0000101423 | Allc          |    | 125 | TRCN0000070512 | Barx2    |
|      | 63        | TRCN0000101424 | Allc          | 27 | 126 | TRCN0000004678 | Bcl2     |
|      |           |                |               |    | 127 | TRCN0000004679 | Bcl2     |



|    |     |                |               |    |     |                 |        |
|----|-----|----------------|---------------|----|-----|-----------------|--------|
|    | 128 | TRCN0000004680 | Bcl2          | 41 | 195 | TRCN0000012243  | Casp8  |
|    | 129 | TRCN0000004681 | Bcl2          |    | 196 | TRCN0000012244  | Casp8  |
| 28 | 130 | TRCN0000042553 | Bcl3          |    | 197 | TRCN0000012245  | Casp8  |
|    | 131 | TRCN0000042554 | Bcl3          |    | 198 | TRCN0000012246  | Casp8  |
|    | 132 | TRCN0000042555 | Bcl3          |    | 199 | TRCN0000012247  | Casp8  |
|    | 133 | TRCN0000042556 | Bcl3          | 42 | 200 | TRCN0000042568  | Cbl    |
|    | 134 | TRCN0000042557 | Bcl3          |    | 201 | TRCN0000042569  | Cbl    |
| 29 | 135 | TRCN0000012563 | Bmi1          |    | 202 | TRCN0000042570  | Cbl    |
|    | 136 | TRCN0000012564 | Bmi1          |    | 203 | TRCN0000042571  | Cbl    |
|    | 137 | TRCN0000012565 | Bmi1          |    | 204 | TRCN0000042572  | Cbl    |
|    | 138 | TRCN0000012566 | Bmi1          | 43 | 205 | TRCN0000071028  | Cbx1   |
|    | 139 | TRCN0000012567 | Bmi1          |    | 206 | TRCN0000071029  | Cbx1   |
| 30 | 140 | TRCN0000025877 | Bmp2          |    | 207 | TRCN0000071030  | Cbx1   |
|    | 141 | TRCN0000025878 | Bmp2          |    | 208 | TRCN0000071031  | Cbx1   |
|    | 142 | TRCN0000025923 | Bmp2          |    | 209 | TRCN0000071032  | Cbx1   |
|    | 143 | TRCN0000025939 | Bmp2          | 44 | 210 | TRCN0000071048  | Cbx5   |
|    | 144 | TRCN0000025949 | Bmp2          |    | 211 | TRCN0000071049  | Cbx5   |
| 31 | 145 | TRCN0000025875 | Bmp4          |    | 212 | TRCN0000071050  | Cbx5   |
|    | 146 | TRCN0000025905 | Bmp4          |    | 213 | TRCN0000071051  | Cbx5   |
|    | 147 | TRCN0000025922 | Bmp4          |    | 214 | TRCN0000071052  | Cbx5   |
|    | 148 | TRCN0000025936 | Bmp4          | 45 | 215 | TRCN0000176503  | Ccdc39 |
|    | 149 | TRCN0000025957 | Bmp4          |    | 216 | TRCN0000176967  | Ccdc39 |
| 32 | 150 | TRCN0000022619 | Bmpr1a        |    | 217 | TRCN0000177337  | Ccdc39 |
|    | 151 | TRCN0000022620 | Bmpr1a        |    | 218 | TRCN0000182114  | Ccdc39 |
|    | 152 | TRCN0000022621 | Bmpr1a        |    | 219 | TRCN0000182268  | Ccdc39 |
|    | 153 | TRCN0000022622 | Bmpr1a        | 46 | 220 | TRCN0000011978  | Ccnd3  |
|    | 154 | TRCN0000022623 | Bmpr1a        |    | 221 | TRCN0000011979  | Ccnd3  |
| 33 | 155 | TRCN0000022529 | Bmpr2         |    | 222 | TRCN0000011980  | Ccnd3  |
|    | 156 | TRCN0000022530 | Bmpr2         |    | 223 | TRCN0000011981  | Ccnd3  |
|    | 157 | TRCN0000022531 | Bmpr2         | 47 | 224 | TRCN00000119627 | Cd320  |
|    | 158 | TRCN0000022532 | Bmpr2         |    | 225 | TRCN00000119629 | Cd320  |
|    | 159 | TRCN0000022533 | Bmpr2         |    | 226 | TRCN00000119630 | Cd320  |
| 34 | 160 | TRCN0000009687 | Bnip3         |    | 227 | TRCN00000119631 | Cd320  |
|    | 161 | TRCN0000009688 | Bnip3         | 48 | 228 | TRCN0000065353  | Cd44   |
|    | 162 | TRCN0000009689 | Bnip3         |    | 229 | TRCN0000065354  | Cd44   |
|    | 163 | TRCN0000009690 | Bnip3         |    | 230 | TRCN0000065355  | Cd44   |
|    | 164 | TRCN0000009691 | Bnip3         |    | 231 | TRCN0000065356  | Cd44   |
| 35 | 165 | TRCN0000022589 | Braf          |    | 232 | TRCN0000065357  | Cd44   |
|    | 166 | TRCN0000022590 | Braf          | 49 | 233 | TRCN0000030109  | Cdc14b |
|    | 167 | TRCN0000022591 | Braf          |    | 234 | TRCN0000030110  | Cdc14b |
|    | 168 | TRCN0000022592 | Braf          |    | 235 | TRCN0000030111  | Cdc14b |
|    | 169 | TRCN0000022593 | Braf          |    | 236 | TRCN0000030112  | Cdc14b |
| 36 | 170 | TRCN0000042558 | Brca1         |    | 237 | TRCN0000030113  | Cdc14b |
|    | 171 | TRCN0000042559 | Brca1         | 50 | 238 | TRCN0000042578  | Cdh1   |
|    | 172 | TRCN0000042560 | Brca1         |    | 239 | TRCN0000042579  | Cdh1   |
|    | 173 | TRCN0000042561 | Brca1         |    | 240 | TRCN0000042580  | Cdh1   |
|    | 174 | TRCN0000042562 | Brca1         |    | 241 | TRCN0000042581  | Cdh1   |
| 37 | 175 | TRCN0000071008 | Brca2         |    | 242 | TRCN0000042582  | Cdh1   |
|    | 176 | TRCN0000071009 | Brca2         | 51 | 243 | TRCN0000094534  | Cdh12  |
|    | 177 | TRCN0000071010 | Brca2         |    | 244 | TRCN0000094535  | Cdh12  |
|    | 178 | TRCN0000071011 | Brca2         |    | 245 | TRCN0000094536  | Cdh12  |
|    | 179 | TRCN0000071012 | Brca2         |    | 246 | TRCN0000094537  | Cdh12  |
| 38 | 180 | TRCN0000103285 | C130053K05Rik |    | 247 | TRCN0000094538  | Cdh12  |
|    | 181 | TRCN0000103286 | C130053K05Rik | 52 | 248 | TRCN0000094729  | Cdh4   |
|    | 182 | TRCN0000103287 | C130053K05Rik |    | 249 | TRCN0000094730  | Cdh4   |
|    | 183 | TRCN0000103288 | C130053K05Rik |    | 250 | TRCN0000094731  | Cdh4   |
|    | 184 | TRCN0000103289 | C130053K05Rik |    | 251 | TRCN0000094732  | Cdh4   |
| 39 | 185 | TRCN0000024114 | Camk1d        |    | 252 | TRCN0000094733  | Cdh4   |
|    | 186 | TRCN0000024115 | Camk1d        | 53 | 253 | TRCN0000094894  | Cdh5   |
|    | 187 | TRCN0000024116 | Camk1d        |    | 254 | TRCN0000094895  | Cdh5   |
|    | 188 | TRCN0000024117 | Camk1d        |    | 255 | TRCN0000094896  | Cdh5   |
|    | 189 | TRCN0000024118 | Camk1d        |    | 256 | TRCN0000094897  | Cdh5   |
| 40 | 190 | TRCN0000114461 | Car2          |    | 257 | TRCN0000094898  | Cdh5   |
|    | 191 | TRCN0000114462 | Car2          | 54 | 258 | TRCN0000094784  | Cdh7   |
|    | 192 | TRCN0000114463 | Car2          |    | 259 | TRCN0000094785  | Cdh7   |
|    | 193 | TRCN0000114464 | Car2          |    | 260 | TRCN0000094786  | Cdh7   |
|    | 194 | TRCN0000114465 | Car2          |    | 261 | TRCN0000094787  | Cdh7   |

|    |     |                |        |    |     |                |         |
|----|-----|----------------|--------|----|-----|----------------|---------|
|    | 262 | TRCN0000094788 | Cdh7   | 69 | 329 | TRCN0000012348 | Chuk    |
| 55 | 263 | TRCN0000023174 | Cdk4   |    | 330 | TRCN0000012349 | Chuk    |
|    | 264 | TRCN0000023175 | Cdk4   |    | 331 | TRCN0000012350 | Chuk    |
|    | 265 | TRCN0000023176 | Cdk4   |    | 332 | TRCN0000012351 | Chuk    |
|    | 266 | TRCN0000023177 | Cdk4   |    | 333 | TRCN0000012352 | Chuk    |
|    | 267 | TRCN0000023178 | Cdk4   | 70 | 334 | TRCN0000069708 | Cica2   |
| 56 | 268 | TRCN0000042583 | Cdkn1a |    | 335 | TRCN0000069709 | Cica2   |
|    | 269 | TRCN0000042585 | Cdkn1a |    | 336 | TRCN0000069710 | Cica2   |
|    | 270 | TRCN0000042586 | Cdkn1a |    | 337 | TRCN0000069711 | Cica2   |
|    | 271 | TRCN0000042587 | Cdkn1a |    | 338 | TRCN0000069712 | Cica2   |
|    | 272 | TRCN0000054898 | Cdkn1a | 71 | 339 | TRCN0000069738 | Clic1   |
|    | 273 | TRCN0000054899 | Cdkn1a |    | 340 | TRCN0000069739 | Clic1   |
|    | 274 | TRCN0000054900 | Cdkn1a |    | 341 | TRCN0000069740 | Clic1   |
|    | 275 | TRCN0000054901 | Cdkn1a |    | 342 | TRCN0000069741 | Clic1   |
|    | 276 | TRCN0000054902 | Cdkn1a | 72 | 343 | TRCN0000023189 | Clk3    |
| 57 | 277 | TRCN0000071063 | Cdkn1b |    | 344 | TRCN0000023190 | Clk3    |
|    | 278 | TRCN0000071064 | Cdkn1b |    | 345 | TRCN0000023191 | Clk3    |
|    | 279 | TRCN0000071066 | Cdkn1b |    | 346 | TRCN0000023192 | Clk3    |
|    | 280 | TRCN0000071067 | Cdkn1b |    | 347 | TRCN0000023193 | Clk3    |
| 58 | 281 | TRCN0000042588 | Cdkn1c | 73 | 348 | TRCN0000023194 | Clk4    |
|    | 282 | TRCN0000042589 | Cdkn1c |    | 349 | TRCN0000023195 | Clk4    |
|    | 283 | TRCN0000042590 | Cdkn1c |    | 350 | TRCN0000023196 | Clk4    |
|    | 284 | TRCN0000042592 | Cdkn1c |    | 351 | TRCN0000023197 | Clk4    |
| 59 | 285 | TRCN0000077813 | Cdkn2a |    | 352 | TRCN0000023198 | Clk4    |
|    | 286 | TRCN0000077815 | Cdkn2a | 74 | 353 | TRCN0000094734 | Clstn2  |
|    | 287 | TRCN0000077816 | Cdkn2a |    | 354 | TRCN0000094735 | Clstn2  |
| 60 | 288 | TRCN0000042598 | Cdkn2b |    | 355 | TRCN0000094736 | Clstn2  |
|    | 289 | TRCN0000042599 | Cdkn2b |    | 356 | TRCN0000094737 | Clstn2  |
|    | 290 | TRCN0000042600 | Cdkn2b |    | 357 | TRCN0000094738 | Clstn2  |
|    | 291 | TRCN0000042601 | Cdkn2b | 75 | 358 | TRCN0000039014 | Cntn1   |
|    | 292 | TRCN0000042602 | Cdkn2b |    | 359 | TRCN0000039015 | Cntn1   |
| 61 | 293 | TRCN0000085088 | Cdkn2d |    | 360 | TRCN0000039016 | Cntn1   |
|    | 294 | TRCN0000085089 | Cdkn2d |    | 361 | TRCN0000039017 | Cntn1   |
|    | 295 | TRCN0000085090 | Cdkn2d |    | 362 | TRCN0000039018 | Cntn1   |
|    | 296 | TRCN0000085091 | Cdkn2d | 76 | 363 | TRCN0000113645 | Cntn3   |
|    | 297 | TRCN0000085092 | Cdkn2d |    | 364 | TRCN0000113646 | Cntn3   |
| 62 | 298 | TRCN0000071654 | Cebpd  |    | 365 | TRCN0000113647 | Cntn3   |
|    | 299 | TRCN0000071655 | Cebpd  |    | 366 | TRCN0000113648 | Cntn3   |
|    | 300 | TRCN0000071657 | Cebpd  |    | 367 | TRCN0000113649 | Cntn3   |
| 63 | 301 | TRCN0000094949 | Celsr3 | 77 | 368 | TRCN0000094359 | Cntnap1 |
|    | 302 | TRCN0000094950 | Celsr3 |    | 369 | TRCN0000094360 | Cntnap1 |
|    | 303 | TRCN0000094951 | Celsr3 |    | 370 | TRCN0000094361 | Cntnap1 |
|    | 304 | TRCN0000094952 | Celsr3 |    | 371 | TRCN0000094362 | Cntnap1 |
|    | 305 | TRCN0000094953 | Celsr3 |    | 372 | TRCN0000094363 | Cntnap1 |
| 64 | 306 | TRCN0000179809 | Cep55  | 78 | 373 | TRCN0000094969 | Cntnap2 |
|    | 307 | TRCN0000182908 | Cep55  |    | 374 | TRCN0000094970 | Cntnap2 |
|    | 308 | TRCN0000183083 | Cep55  |    | 375 | TRCN0000094971 | Cntnap2 |
|    | 309 | TRCN0000183560 | Cep55  |    | 376 | TRCN0000094972 | Cntnap2 |
| 65 | 310 | TRCN0000012648 | Chek1  |    | 377 | TRCN0000094973 | Cntnap2 |
|    | 311 | TRCN0000012649 | Chek1  | 79 | 378 | TRCN0000094539 | Cntnap4 |
|    | 312 | TRCN0000012650 | Chek1  |    | 379 | TRCN0000094540 | Cntnap4 |
|    | 313 | TRCN0000012651 | Chek1  | 80 | 380 | TRCN0000090503 | Col1a1  |
|    | 314 | TRCN0000012652 | Chek1  |    | 381 | TRCN0000090504 | Col1a1  |
| 66 | 315 | TRCN0000012653 | Chek2  |    | 382 | TRCN0000090505 | Col1a1  |
|    | 316 | TRCN0000012654 | Chek2  |    | 383 | TRCN0000090506 | Col1a1  |
|    | 317 | TRCN0000012655 | Chek2  |    | 384 | TRCN0000090507 | Col1a1  |
|    | 318 | TRCN0000012656 | Chek2  | 81 | 385 | TRCN0000090043 | Col1a2  |
|    | 319 | TRCN0000012657 | Chek2  |    | 386 | TRCN0000090044 | Col1a2  |
| 67 | 320 | TRCN0000103290 | Chpt1  |    | 387 | TRCN0000090045 | Col1a2  |
|    | 321 | TRCN0000103292 | Chpt1  |    | 388 | TRCN0000090046 | Col1a2  |
|    | 322 | TRCN0000103293 | Chpt1  |    | 389 | TRCN0000090047 | Col1a2  |
|    | 323 | TRCN0000103294 | Chpt1  | 82 | 390 | TRCN0000091163 | Col22a1 |
| 68 | 324 | TRCN0000025883 | Chrd   |    | 391 | TRCN0000091164 | Col22a1 |
|    | 325 | TRCN0000025906 | Chrd   |    | 392 | TRCN0000091165 | Col22a1 |
|    | 326 | TRCN0000025914 | Chrd   |    | 393 | TRCN0000091166 | Col22a1 |
|    | 327 | TRCN0000025932 | Chrd   |    | 394 | TRCN0000091167 | Col22a1 |
|    | 328 | TRCN0000025944 | Chrd   | 83 | 395 | TRCN0000091483 | Col3a1  |

|    |     |                |         |     |     |                |        |
|----|-----|----------------|---------|-----|-----|----------------|--------|
|    | 396 | TRCN0000091484 | Col3a1  |     | 463 | TRCN0000099476 | Defb6  |
|    | 397 | TRCN0000091485 | Col3a1  |     | 464 | TRCN0000099477 | Defb6  |
|    | 398 | TRCN0000091486 | Col3a1  |     | 465 | TRCN0000099478 | Defb6  |
|    | 399 | TRCN0000091487 | Col3a1  | 98  | 466 | TRCN0000028845 | Dil1   |
| 84 | 400 | TRCN0000031319 | Cpxm2   |     | 467 | TRCN0000028864 | Dil1   |
|    | 401 | TRCN0000031320 | Cpxm2   |     | 468 | TRCN0000028865 | Dil1   |
|    | 402 | TRCN0000031321 | Cpxm2   |     | 469 | TRCN0000028890 | Dil1   |
|    | 403 | TRCN0000031322 | Cpxm2   |     | 470 | TRCN0000028910 | Dil1   |
|    | 404 | TRCN0000031323 | Cpxm2   | 99  | 471 | TRCN0000028875 | Dil3   |
| 85 | 405 | TRCN0000105235 | Crabp2  |     | 472 | TRCN0000028879 | Dil3   |
|    | 406 | TRCN0000105236 | Crabp2  |     | 473 | TRCN0000028896 | Dil3   |
|    | 407 | TRCN0000105237 | Crabp2  |     | 474 | TRCN0000028907 | Dil3   |
|    | 408 | TRCN0000105238 | Crabp2  |     | 475 | TRCN0000028924 | Dil3   |
|    | 409 | TRCN0000105239 | Crabp2  | 100 | 476 | TRCN0000028894 | Dil4   |
| 86 | 410 | TRCN0000042603 | Crk     |     | 477 | TRCN0000028916 | Dil4   |
|    | 411 | TRCN0000042604 | Crk     |     | 478 | TRCN0000028928 | Dil4   |
|    | 412 | TRCN0000042606 | Crk     | 101 | 479 | TRCN0000070598 | Dlx2   |
|    | 413 | TRCN0000042607 | Crk     |     | 480 | TRCN0000070599 | Dlx2   |
| 87 | 414 | TRCN0000023734 | Csk     |     | 481 | TRCN0000070600 | Dlx2   |
|    | 415 | TRCN0000023735 | Csk     |     | 482 | TRCN0000070601 | Dlx2   |
|    | 416 | TRCN0000023736 | Csk     |     | 483 | TRCN0000070602 | Dlx2   |
|    | 417 | TRCN0000023737 | Csk     | 102 | 484 | TRCN0000070608 | Dlx3   |
|    | 418 | TRCN0000023738 | Csk     |     | 485 | TRCN0000070609 | Dlx3   |
| 88 | 419 | TRCN0000087303 | Csmd3   |     | 486 | TRCN0000070610 | Dlx3   |
|    | 420 | TRCN0000087304 | Csmd3   |     | 487 | TRCN0000070611 | Dlx3   |
|    | 421 | TRCN0000087305 | Csmd3   | 103 | 488 | TRCN0000070612 | Dlx3   |
|    | 422 | TRCN0000087306 | Csmd3   |     | 489 | TRCN0000070628 | Dlx5   |
|    | 423 | TRCN0000087307 | Csmd3   |     | 490 | TRCN0000070629 | Dlx5   |
| 89 | 424 | TRCN0000080278 | Cst6    |     | 491 | TRCN0000070630 | Dlx5   |
|    | 425 | TRCN0000080279 | Cst6    |     | 492 | TRCN0000070632 | Dlx5   |
|    | 426 | TRCN0000080280 | Cst6    | 104 | 493 | TRCN0000086488 | Dmrta2 |
|    | 427 | TRCN0000080281 | Cst6    |     | 494 | TRCN0000086489 | Dmrta2 |
|    | 428 | TRCN0000080282 | Cst6    |     | 495 | TRCN0000086490 | Dmrta2 |
| 90 | 429 | TRCN0000039019 | Ctcf    |     | 496 | TRCN0000086491 | Dmrta2 |
|    | 430 | TRCN0000039020 | Ctcf    | 105 | 497 | TRCN0000008562 | Dnajb9 |
|    | 431 | TRCN0000039021 | Ctcf    |     | 498 | TRCN0000008563 | Dnajb9 |
|    | 432 | TRCN0000039022 | Ctcf    |     | 499 | TRCN0000008564 | Dnajb9 |
|    | 433 | TRCN0000039023 | Ctcf    |     | 500 | TRCN0000008565 | Dnajb9 |
| 91 | 434 | TRCN0000109665 | Ctgf    |     | 501 | TRCN0000008566 | Dnajb9 |
|    | 435 | TRCN0000109666 | Ctgf    | 106 | 502 | TRCN0000039024 | Dnmt1  |
|    | 436 | TRCN0000109667 | Ctgf    |     | 503 | TRCN0000039025 | Dnmt1  |
|    | 437 | TRCN0000109668 | Ctgf    |     | 504 | TRCN0000039026 | Dnmt1  |
|    | 438 | TRCN0000109669 | Ctgf    |     | 505 | TRCN0000039027 | Dnmt1  |
| 92 | 439 | TRCN0000065368 | Cxcl14  |     | 506 | TRCN0000039028 | Dnmt1  |
|    | 440 | TRCN0000065369 | Cxcl14  | 107 | 507 | TRCN0000039029 | Dnmt2  |
|    | 441 | TRCN0000065370 | Cxcl14  |     | 508 | TRCN0000039030 | Dnmt2  |
|    | 442 | TRCN0000065371 | Cxcl14  |     | 509 | TRCN0000039031 | Dnmt2  |
|    | 443 | TRCN0000065372 | Cxcl14  |     | 510 | TRCN0000039032 | Dnmt2  |
| 93 | 444 | TRCN0000067258 | Cxcl2   |     | 511 | TRCN0000039033 | Dnmt2  |
|    | 445 | TRCN0000067259 | Cxcl2   | 108 | 512 | TRCN0000039034 | Dnmt3a |
|    | 446 | TRCN0000067260 | Cxcl2   |     | 513 | TRCN0000039035 | Dnmt3a |
|    | 447 | TRCN0000067261 | Cxcl2   |     | 514 | TRCN0000039036 | Dnmt3a |
| 94 | 448 | TRCN0000028678 | Cxcr4   |     | 515 | TRCN0000039037 | Dnmt3a |
|    | 449 | TRCN0000028704 | Cxcr4   |     | 516 | TRCN0000039038 | Dnmt3a |
|    | 450 | TRCN0000028724 | Cxcr4   | 109 | 517 | TRCN0000039104 | Dnmt3l |
|    | 451 | TRCN0000028749 | Cxcr4   |     | 518 | TRCN0000039105 | Dnmt3l |
|    | 452 | TRCN0000028750 | Cxcr4   |     | 519 | TRCN0000039106 | Dnmt3l |
| 95 | 453 | TRCN0000125700 | Cyp4f16 |     | 520 | TRCN0000039107 | Dnmt3l |
|    | 454 | TRCN0000125701 | Cyp4f16 |     | 521 | TRCN0000039108 | Dnmt3l |
|    | 455 | TRCN0000125702 | Cyp4f16 | 110 | 522 | TRCN0000054348 | Dusp4  |
|    | 456 | TRCN0000125703 | Cyp4f16 |     | 523 | TRCN0000054349 | Dusp4  |
| 96 | 457 | TRCN0000103750 | Ddx3x   |     | 524 | TRCN0000054350 | Dusp4  |
|    | 458 | TRCN0000103751 | Ddx3x   |     | 525 | TRCN0000054351 | Dusp4  |
|    | 459 | TRCN0000103752 | Ddx3x   |     | 526 | TRCN0000054352 | Dusp4  |
|    | 460 | TRCN0000103753 | Ddx3x   | 111 | 527 | TRCN0000023479 | Egfr   |
|    | 461 | TRCN0000103754 | Ddx3x   |     | 528 | TRCN0000023480 | Egfr   |
| 97 | 462 | TRCN0000099475 | Defb6   |     | 529 | TRCN0000023481 | Egfr   |

|     |     |                |       |     |     |                |       |
|-----|-----|----------------|-------|-----|-----|----------------|-------|
|     | 530 | TRCN0000023482 | Egfr  |     | 597 | TRCN0000095696 | Ezh1  |
|     | 531 | TRCN0000023483 | Egfr  |     | 598 | TRCN0000095697 | Ezh1  |
|     | 532 | TRCN0000055218 | Egfr  |     | 599 | TRCN0000095698 | Ezh1  |
|     | 533 | TRCN0000055219 | Egfr  | 125 | 600 | TRCN0000039039 | Ezh2  |
|     | 534 | TRCN0000055220 | Egfr  |     | 601 | TRCN0000039040 | Ezh2  |
|     | 535 | TRCN0000055221 | Egfr  |     | 602 | TRCN0000039041 | Ezh2  |
|     | 536 | TRCN0000055222 | Egfr  |     | 603 | TRCN0000039042 | Ezh2  |
| 112 | 537 | TRCN0000009749 | Egln3 |     | 604 | TRCN0000039043 | Ezh2  |
|     | 538 | TRCN0000009750 | Egln3 | 126 | 605 | TRCN0000105190 | Fabp3 |
|     | 539 | TRCN0000009751 | Egln3 |     | 606 | TRCN0000105191 | Fabp3 |
|     | 540 | TRCN0000009752 | Egln3 |     | 607 | TRCN0000105192 | Fabp3 |
|     | 541 | TRCN0000009753 | Egln3 |     | 608 | TRCN0000105193 | Fabp3 |
| 113 | 542 | TRCN0000081623 | Egr1  |     | 609 | TRCN0000105194 | Fabp3 |
|     | 543 | TRCN0000081624 | Egr1  | 127 | 610 | TRCN0000105185 | Fabp4 |
|     | 544 | TRCN0000081625 | Egr1  |     | 611 | TRCN0000105186 | Fabp4 |
|     | 545 | TRCN0000081626 | Egr1  |     | 612 | TRCN0000105187 | Fabp4 |
|     | 546 | TRCN0000081627 | Egr1  |     | 613 | TRCN0000105188 | Fabp4 |
| 114 | 547 | TRCN0000081678 | Egr2  |     | 614 | TRCN0000105189 | Fabp4 |
|     | 548 | TRCN0000081679 | Egr2  |     |     | NM_010634.1-   |       |
|     | 549 | TRCN0000081680 | Egr2  | 128 | 615 | 149s1c1        | Fabp5 |
|     | 550 | TRCN0000081681 | Egr2  |     |     | NM_010634.1-   |       |
|     | 551 | TRCN0000081682 | Egr2  |     | 616 | 592s1c1        | Fabp5 |
| 115 | 552 | TRCN0000081788 | Ehf   |     | 617 | TRCN0000011894 | Fabp5 |
|     | 553 | TRCN0000081789 | Ehf   |     | 618 | TRCN0000011896 | Fabp5 |
|     | 554 | TRCN0000081790 | Ehf   |     | 619 | TRCN0000011897 | Fabp5 |
|     | 555 | TRCN0000081791 | Ehf   | 129 | 620 | TRCN0000114336 | Fads2 |
|     | 556 | TRCN0000081792 | Ehf   |     | 621 | TRCN0000114337 | Fads2 |
| 116 | 557 | TRCN0000081938 | Elf5  |     | 622 | TRCN0000114338 | Fads2 |
|     | 558 | TRCN0000081939 | Elf5  |     | 623 | TRCN0000114340 | Fads2 |
|     | 559 | TRCN0000081940 | Elf5  | 130 | 624 | TRCN0000173476 | Fancm |
|     | 560 | TRCN0000081941 | Elf5  |     | 625 | TRCN0000173798 | Fancm |
|     | 561 | TRCN0000081942 | Elf5  |     | 626 | TRCN0000175001 | Fancm |
| 117 | 562 | TRCN0000042643 | Elk3  |     | 627 | TRCN0000176065 | Fancm |
|     | 563 | TRCN0000042644 | Elk3  |     | 628 | TRCN0000176066 | Fancm |
|     | 564 | TRCN0000042645 | Elk3  | 131 | 629 | TRCN0000094844 | Fath  |
|     | 565 | TRCN0000042646 | Elk3  |     | 630 | TRCN0000094845 | Fath  |
|     | 566 | TRCN0000042647 | Elk3  |     | 631 | TRCN0000094846 | Fath  |
| 118 | 567 | TRCN0000023679 | Epha7 |     | 632 | TRCN0000094847 | Fath  |
|     | 568 | TRCN0000023680 | Epha7 |     | 633 | TRCN0000094848 | Fath  |
|     | 569 | TRCN0000023681 | Epha7 | 132 | 634 | TRCN0000012828 | Fbxw7 |
|     | 570 | TRCN0000023682 | Epha7 |     | 635 | TRCN0000012829 | Fbxw7 |
|     | 571 | TRCN0000023683 | Epha7 |     | 636 | TRCN0000012830 | Fbxw7 |
| 119 | 572 | TRCN0000092273 | Eps8  |     | 637 | TRCN0000012831 | Fbxw7 |
|     | 573 | TRCN0000092274 | Eps8  |     | 638 | TRCN0000012832 | Fbxw7 |
|     | 574 | TRCN0000092275 | Eps8  | 133 | 639 | TRCN0000004653 | Ffar1 |
|     | 575 | TRCN0000092276 | Eps8  |     | 640 | TRCN0000004654 | Ffar1 |
|     | 576 | TRCN0000092277 | Eps8  |     | 641 | TRCN0000004655 | Ffar1 |
| 120 | 577 | TRCN0000190945 | Esm1  | 134 | 642 | TRCN0000009606 | Flt1  |
|     | 578 | TRCN0000192471 | Esm1  |     | 643 | TRCN0000009607 | Flt1  |
|     | 579 | TRCN0000192502 | Esm1  |     | 644 | TRCN0000009608 | Flt1  |
|     | 580 | TRCN0000192617 | Esm1  |     | 645 | TRCN0000009609 | Flt1  |
| 121 | 581 | TRCN0000026176 | Esr1  |     | 646 | TRCN0000009610 | Flt1  |
|     | 582 | TRCN0000026184 | Esr1  | 135 | 647 | TRCN0000023739 | Flt3  |
|     | 583 | TRCN0000026197 | Esr1  |     | 648 | TRCN0000023740 | Flt3  |
|     | 584 | TRCN0000026201 | Esr1  |     | 649 | TRCN0000023741 | Flt3  |
|     | 585 | TRCN0000026214 | Esr1  |     | 650 | TRCN0000023742 | Flt3  |
| 122 | 586 | TRCN0000026150 | Esr2  |     | 651 | TRCN0000023743 | Flt3  |
|     | 587 | TRCN0000026170 | Esr2  | 136 | 652 | TRCN0000023754 | Flt4  |
|     | 588 | TRCN0000026192 | Esr2  |     | 653 | TRCN0000023755 | Flt4  |
|     | 589 | TRCN0000026215 | Esr2  |     | 654 | TRCN0000023756 | Flt4  |
| 123 | 590 | TRCN0000111725 | Exoc4 |     | 655 | TRCN0000023757 | Flt4  |
|     | 591 | TRCN0000111726 | Exoc4 |     | 656 | TRCN0000023758 | Flt4  |
|     | 592 | TRCN0000111727 | Exoc4 | 137 | 657 | TRCN0000120512 | Fmn2  |
|     | 593 | TRCN0000111728 | Exoc4 |     | 658 | TRCN0000120513 | Fmn2  |
|     | 594 | TRCN0000111729 | Exoc4 |     | 659 | TRCN0000120514 | Fmn2  |
| 124 | 595 | TRCN0000095694 | Ezh1  |     | 660 | TRCN0000120515 | Fmn2  |
|     | 596 | TRCN0000095695 | Ezh1  |     | 661 | TRCN0000120516 | Fmn2  |

|     |     |                |       |     |                |           |
|-----|-----|----------------|-------|-----|----------------|-----------|
| 138 | 662 | TRCN0000084288 | Foxj2 | 729 | TRCN0000103432 | Gsta4     |
|     | 663 | TRCN0000084289 | Foxj2 | 730 | TRCN0000103433 | Gsta4     |
|     | 664 | TRCN0000084290 | Foxj2 | 731 | TRCN0000103434 | Gsta4     |
|     | 665 | TRCN0000084291 | Foxj2 | 152 | TRCN0000103240 | Gstm1     |
|     | 666 | TRCN0000084292 | Foxj2 | 733 | TRCN0000103241 | Gstm1     |
| 139 | 667 | TRCN0000072003 | Foxp1 | 734 | TRCN0000103242 | Gstm1     |
|     | 668 | TRCN0000072004 | Foxp1 | 735 | TRCN0000103243 | Gstm1     |
|     | 669 | TRCN0000072005 | Foxp1 | 736 | TRCN0000103244 | Gstm1     |
|     | 670 | TRCN0000072006 | Foxp1 | 153 | TRCN0000103160 | Gstm2     |
|     | 671 | TRCN0000072007 | Foxp1 | 737 | TRCN0000103161 | Gstm2     |
| 140 | 672 | TRCN0000108925 | Fscn1 | 738 | TRCN0000103162 | Gstm2     |
|     | 673 | TRCN0000108926 | Fscn1 | 739 | TRCN0000103163 | Gstm2     |
|     | 674 | TRCN0000108927 | Fscn1 | 740 | TRCN0000103164 | Gstm2     |
|     | 675 | TRCN0000108928 | Fscn1 | 741 | TRCN0000103164 | Gstm2     |
|     | 676 | TRCN0000108929 | Fscn1 | 154 | TRCN0000028854 | Hes1      |
| 141 | 677 | TRCN0000085478 | Gata3 | 743 | TRCN0000028855 | Hes1      |
|     | 678 | TRCN0000085479 | Gata3 | 744 | TRCN0000028881 | Hes1      |
|     | 679 | TRCN0000085480 | Gata3 | 745 | TRCN0000028925 | Hes1      |
|     | 680 | TRCN0000085481 | Gata3 | 746 | TRCN0000028927 | Hes1      |
|     | 681 | TRCN0000085482 | Gata3 | 155 | TRCN0000096954 | Hist1h2bh |
| 142 | 682 | TRCN0000068823 | Gjb5  | 748 | TRCN0000096955 | Hist1h2bh |
|     | 683 | TRCN0000068824 | Gjb5  | 749 | TRCN0000096956 | Hist1h2bh |
|     | 684 | TRCN0000068825 | Gjb5  | 750 | TRCN0000096957 | Hist1h2bh |
|     | 685 | TRCN0000068826 | Gjb5  | 751 | TRCN0000096958 | Hist1h2bh |
|     | 686 | TRCN0000068827 | Gjb5  | 156 | TRCN0000126044 | Hmga2     |
| 143 | 687 | TRCN0000027955 | Gpr56 | 752 | TRCN0000126045 | Hmga2     |
|     | 688 | TRCN0000027962 | Gpr56 | 753 | TRCN0000126046 | Hmga2     |
|     | 689 | TRCN0000027970 | Gpr56 | 754 | TRCN0000126047 | Hmga2     |
|     | 690 | TRCN0000027988 | Gpr56 | 755 | TRCN0000126047 | Hmga2     |
|     | 691 | TRCN0000027999 | Gpr56 | 756 | TRCN0000126048 | Hmga2     |
| 144 | 692 | TRCN0000076528 | Gpx2  | 157 | TRCN0000075583 | Hmgb2     |
|     | 693 | TRCN0000076529 | Gpx2  | 757 | TRCN0000075584 | Hmgb2     |
|     | 694 | TRCN0000076530 | Gpx2  | 758 | TRCN0000075584 | Hmgb2     |
|     | 695 | TRCN0000076531 | Gpx2  | 759 | TRCN0000075585 | Hmgb2     |
|     | 696 | TRCN0000076532 | Gpx2  | 760 | TRCN0000075586 | Hmgb2     |
| 145 | 697 | TRCN0000103545 | Grhl3 | 761 | TRCN0000075587 | Hmgb2     |
|     | 698 | TRCN0000103546 | Grhl3 | 158 | TRCN0000070789 | Hoxa4     |
|     | 699 | TRCN0000103547 | Grhl3 | 762 | TRCN0000070789 | Hoxa4     |
|     | 700 | TRCN0000103548 | Grhl3 | 763 | TRCN0000070790 | Hoxa4     |
|     | 701 | TRCN0000103549 | Grhl3 | 764 | TRCN0000070791 | Hoxa4     |
| 146 | 702 | TRCN0000103040 | Grid1 | 765 | TRCN0000070792 | Hoxa4     |
|     | 703 | TRCN0000103041 | Grid1 | 159 | TRCN0000012518 | Hoxa5     |
|     | 704 | TRCN0000103042 | Grid1 | 767 | TRCN0000012519 | Hoxa5     |
|     | 705 | TRCN0000103043 | Grid1 | 768 | TRCN0000012520 | Hoxa5     |
|     | 706 | TRCN0000103044 | Grid1 | 769 | TRCN0000012521 | Hoxa5     |
| 147 | 707 | TRCN0000012613 | Gsk3b | 770 | TRCN0000012522 | Hoxa5     |
|     | 708 | TRCN0000012614 | Gsk3b | 160 | TRCN0000070863 | Hoxb6     |
|     | 709 | TRCN0000012615 | Gsk3b | 771 | TRCN0000070864 | Hoxb6     |
|     | 710 | TRCN0000012616 | Gsk3b | 772 | TRCN0000070864 | Hoxb6     |
|     | 711 | TRCN0000012617 | Gsk3b | 773 | TRCN0000070865 | Hoxb6     |
| 148 | 712 | TRCN0000103310 | Gsta1 | 774 | TRCN0000070866 | Hoxb6     |
|     | 713 | TRCN0000103311 | Gsta1 | 775 | TRCN0000070867 | Hoxb6     |
|     | 714 | TRCN0000103312 | Gsta1 | 161 | TRCN0000070888 | Hoxb9     |
|     | 715 | TRCN0000103313 | Gsta1 | 777 | TRCN0000070889 | Hoxb9     |
|     | 716 | TRCN0000103314 | Gsta1 | 778 | TRCN0000070890 | Hoxb9     |
| 149 | 717 | TRCN0000103295 | Gsta2 | 779 | TRCN0000070891 | Hoxb9     |
|     | 718 | TRCN0000103296 | Gsta2 | 780 | TRCN0000070892 | Hoxb9     |
|     | 719 | TRCN0000103297 | Gsta2 | 162 | TRCN0000070908 | Hoxc13    |
|     | 720 | TRCN0000103298 | Gsta2 | 781 | TRCN0000070909 | Hoxc13    |
|     | 721 | TRCN0000103299 | Gsta2 | 782 | TRCN0000070909 | Hoxc13    |
| 150 | 722 | TRCN0000103280 | Gsta3 | 783 | TRCN0000070910 | Hoxc13    |
|     | 723 | TRCN0000103281 | Gsta3 | 784 | TRCN0000070911 | Hoxc13    |
|     | 724 | TRCN0000103282 | Gsta3 | 163 | TRCN0000070938 | Hoxc6     |
|     | 725 | TRCN0000103283 | Gsta3 | 785 | TRCN0000070939 | Hoxc6     |
|     | 726 | TRCN0000103284 | Gsta3 | 786 | TRCN0000070939 | Hoxc6     |
| 151 | 727 | TRCN0000103430 | Gsta4 | 787 | TRCN0000070940 | Hoxc6     |
|     | 728 | TRCN0000103431 | Gsta4 | 788 | TRCN0000070941 | Hoxc6     |
|     |     |                |       | 789 | TRCN0000070942 | Hoxc6     |
|     |     |                |       | 164 | TRCN0000070948 | Hoxc8     |
|     |     |                |       | 791 | TRCN0000070949 | Hoxc8     |
|     |     |                |       | 792 | TRCN0000070950 | Hoxc8     |
|     |     |                |       | 793 | TRCN0000070951 | Hoxc8     |
|     |     |                |       | 165 | TRCN0000070468 | Hoxd9     |
|     |     |                |       | 794 | TRCN0000070468 | Hoxd9     |
|     |     |                |       | 795 | TRCN0000070469 | Hoxd9     |

|     |     |                |         |     |     |                |        |
|-----|-----|----------------|---------|-----|-----|----------------|--------|
|     | 796 | TRCN0000070470 | Hoxd9   |     | 863 | TRCN0000028869 | Jag1   |
|     | 797 | TRCN0000070471 | Hoxd9   |     | 864 | TRCN0000028887 | Jag1   |
|     | 798 | TRCN0000070472 | Hoxd9   |     | 865 | TRCN0000028933 | Jag1   |
| 166 | 799 | TRCN0000034379 | Hras1   | 180 | 866 | TRCN0000028871 | Jag2   |
|     | 800 | TRCN0000034380 | Hras1   |     | 867 | TRCN0000028877 | Jag2   |
|     | 801 | TRCN0000034381 | Hras1   |     | 868 | TRCN0000028897 | Jag2   |
|     | 802 | TRCN0000034382 | Hras1   |     | 869 | TRCN0000028906 | Jag2   |
|     | 803 | TRCN0000034383 | Hras1   | 181 | 870 | TRCN0000075548 | Jub    |
| 167 | 804 | TRCN0000071433 | Id1     |     | 871 | TRCN0000075549 | Jub    |
|     | 805 | TRCN0000071435 | Id1     |     | 872 | TRCN0000075550 | Jub    |
|     | 806 | TRCN0000071437 | Id1     |     | 873 | TRCN0000075551 | Jub    |
| 168 | 807 | TRCN0000071438 | Id3     |     | 874 | TRCN0000075552 | Jub    |
|     | 808 | TRCN0000071439 | Id3     | 182 | 875 | TRCN0000055203 | Jun    |
|     | 809 | TRCN0000071440 | Id3     |     | 876 | TRCN0000055204 | Jun    |
|     | 810 | TRCN0000071444 | Id4     |     | 877 | TRCN0000055205 | Jun    |
| 169 | 811 | TRCN0000023489 | Igf1r   |     | 878 | TRCN0000055206 | Jun    |
|     | 812 | TRCN0000023490 | Igf1r   |     | 879 | TRCN0000055207 | Jun    |
|     | 813 | TRCN0000023491 | Igf1r   | 183 | 880 | TRCN0000069668 | Kctd8  |
|     | 814 | TRCN0000023492 | Igf1r   |     | 881 | TRCN0000069669 | Kctd8  |
|     | 815 | TRCN0000023493 | Igf1r   |     | 882 | TRCN0000069670 | Kctd8  |
| 170 | 816 | TRCN0000096759 | Igf2bp2 |     | 883 | TRCN0000069671 | Kctd8  |
|     | 817 | TRCN0000096760 | Igf2bp2 |     | 884 | TRCN0000069672 | Kctd8  |
|     | 818 | TRCN0000096761 | Igf2bp2 | 184 | 885 | TRCN0000023744 | Kdr    |
|     | 819 | TRCN0000096762 | Igf2bp2 |     | 886 | TRCN0000023745 | Kdr    |
|     | 820 | TRCN0000096763 | Igf2bp2 |     | 887 | TRCN0000023746 | Kdr    |
| 171 | 821 | TRCN0000012858 | Igfbp2  |     | 888 | TRCN0000023747 | Kdr    |
|     | 822 | TRCN0000012859 | Igfbp2  |     | 889 | TRCN0000023748 | Kdr    |
|     | 823 | TRCN0000012860 | Igfbp2  | 185 | 890 | TRCN0000071468 | Klf15  |
|     | 824 | TRCN0000012861 | Igfbp2  |     | 891 | TRCN0000071469 | Klf15  |
|     | 825 | TRCN0000012862 | Igfbp2  |     | 892 | TRCN0000071470 | Klf15  |
| 172 | 826 | TRCN0000026867 | Ikbkb   |     | 893 | TRCN0000071471 | Klf15  |
|     | 827 | TRCN0000026891 | Ikbkb   |     | 894 | TRCN0000071472 | Klf15  |
|     | 828 | TRCN0000026894 | Ikbkb   | 186 | 895 | TRCN0000075558 | Klf3   |
|     | 829 | TRCN0000026913 | Ikbkb   |     | 896 | TRCN0000075559 | Klf3   |
|     | 830 | TRCN0000026945 | Ikbkb   |     | 897 | TRCN0000075560 | Klf3   |
| 173 | 831 | TRCN0000088808 | Ikbkg   |     | 898 | TRCN0000075561 | Klf3   |
|     | 832 | TRCN0000088809 | Ikbkg   |     | 899 | TRCN0000075562 | Klf3   |
|     | 833 | TRCN0000088810 | Ikbkg   | 187 | 900 | TRCN0000034384 | Kras   |
|     | 834 | TRCN0000088811 | Ikbkg   |     | 901 | TRCN0000034385 | Kras   |
|     | 835 | TRCN0000088812 | Ikbkg   |     | 902 | TRCN0000034386 | Kras   |
| 174 | 836 | TRCN0000068248 | Il1r2   |     | 903 | TRCN0000034387 | Kras   |
|     | 837 | TRCN0000068249 | Il1r2   |     | 904 | TRCN0000034388 | Kras   |
|     | 838 | TRCN0000068250 | Il1r2   | 188 | 905 | TRCN0000022524 | Ksr1   |
|     | 839 | TRCN0000068251 | Il1r2   |     | 906 | TRCN0000022525 | Ksr1   |
|     | 840 | TRCN0000068252 | Il1r2   |     | 907 | TRCN0000022527 | Ksr1   |
| 175 | 841 | TRCN0000085328 | Irf6    |     | 908 | TRCN0000022528 | Ksr1   |
|     | 842 | TRCN0000085329 | Irf6    | 189 | 909 | TRCN0000022594 | Ksr2   |
|     | 843 | TRCN0000085330 | Irf6    |     | 910 | TRCN0000022595 | Ksr2   |
|     | 844 | TRCN0000085331 | Irf6    |     | 911 | TRCN0000022596 | Ksr2   |
|     | 845 | TRCN0000085332 | Irf6    |     | 912 | TRCN0000022597 | Ksr2   |
| 176 | 846 | TRCN0000070478 | Irx1    |     | 913 | TRCN0000022598 | Ksr2   |
|     | 847 | TRCN0000070479 | Irx1    | 190 | 914 | TRCN0000075563 | Lasp1  |
|     | 848 | TRCN0000070480 | Irx1    |     | 915 | TRCN0000075564 | Lasp1  |
|     | 849 | TRCN0000070481 | Irx1    |     | 916 | TRCN0000075565 | Lasp1  |
|     | 850 | TRCN0000070482 | Irx1    |     | 917 | TRCN0000075566 | Lasp1  |
| 177 | 851 | TRCN0000070403 | Irx4    |     | 918 | TRCN0000075567 | Lasp1  |
|     | 852 | TRCN0000070404 | Irx4    | 191 | 919 | TRCN0000022704 | Lats2  |
|     | 853 | TRCN0000070405 | Irx4    |     | 920 | TRCN0000022705 | Lats2  |
|     | 854 | TRCN0000070406 | Irx4    |     | 921 | TRCN0000022706 | Lats2  |
|     | 855 | TRCN0000070407 | Irx4    |     | 922 | TRCN0000022707 | Lats2  |
| 178 | 856 | TRCN0000070418 | Irx5    |     | 923 | TRCN0000022708 | Lats2  |
|     | 857 | TRCN0000070419 | Irx5    | 192 | 924 | TRCN0000012673 | Lef1   |
|     | 858 | TRCN0000070420 | Irx5    |     | 925 | TRCN0000012674 | Lef1   |
|     | 859 | TRCN0000070421 | Irx5    |     | 926 | TRCN0000012675 | Lef1   |
|     | 860 | TRCN0000070422 | Irx5    |     | 927 | TRCN0000012676 | Lef1   |
| 179 | 861 | TRCN0000028850 | Jag1    |     | 928 | TRCN0000012677 | Lef1   |
|     | 862 | TRCN0000028860 | Jag1    | 193 | 929 | TRCN0000067908 | Lefty1 |

|     |     |                |         |     |      |                |          |
|-----|-----|----------------|---------|-----|------|----------------|----------|
|     | 930 | TRCN0000067909 | Lefty1  |     | 997  | TRCN0000012759 | Map4k1   |
|     | 931 | TRCN0000067911 | Lefty1  |     | 998  | TRCN0000012761 | Map4k1   |
|     | 932 | TRCN0000067912 | Lefty1  |     | 999  | TRCN0000012762 | Map4k1   |
| 194 | 933 | TRCN0000070533 | Lhx2    | 208 | 1000 | TRCN0000055223 | Mapk14   |
|     | 934 | TRCN0000070534 | Lhx2    |     | 1001 | TRCN0000055224 | Mapk14   |
|     | 935 | TRCN0000070535 | Lhx2    |     | 1002 | TRCN0000055225 | Mapk14   |
|     | 936 | TRCN0000070536 | Lhx2    |     | 1003 | TRCN0000055226 | Mapk14   |
|     | 937 | TRCN0000070537 | Lhx2    |     | 1004 | TRCN0000055227 | Mapk14   |
| 195 | 938 | TRCN0000095669 | Limd1   | 209 | 1005 | TRCN0000023184 | Mapk3    |
|     | 939 | TRCN0000095670 | Limd1   |     | 1006 | TRCN0000023185 | Mapk3    |
|     | 940 | TRCN0000095671 | Limd1   |     | 1007 | TRCN0000023186 | Mapk3    |
|     | 941 | TRCN0000095672 | Limd1   |     | 1008 | TRCN0000023187 | Mapk3    |
|     | 942 | TRCN0000095673 | Limd1   |     | 1009 | TRCN0000023188 | Mapk3    |
| 196 | 943 | TRCN0000084373 | Lmo4    | 210 | 1010 | TRCN0000023179 | Mapk4    |
|     | 944 | TRCN0000084374 | Lmo4    |     | 1011 | TRCN0000023180 | Mapk4    |
|     | 945 | TRCN0000084375 | Lmo4    |     | 1012 | TRCN0000023181 | Mapk4    |
|     | 946 | TRCN0000084376 | Lmo4    |     | 1013 | TRCN0000023182 | Mapk4    |
|     | 947 | TRCN0000084377 | Lmo4    |     | 1014 | TRCN0000023183 | Mapk4    |
| 197 | 948 | TRCN0000070438 | Lmx1a   | 211 | 1015 | TRCN0000023199 | Mapk6    |
|     | 949 | TRCN0000070439 | Lmx1a   |     | 1016 | TRCN0000023200 | Mapk6    |
|     | 950 | TRCN0000070440 | Lmx1a   |     | 1017 | TRCN0000023201 | Mapk6    |
|     | 951 | TRCN0000070441 | Lmx1a   |     | 1018 | TRCN0000023202 | Mapk6    |
|     | 952 | TRCN0000070442 | Lmx1a   |     | 1019 | TRCN0000023203 | Mapk6    |
| 198 | 953 | TRCN0000119622 | Lrp1    | 212 | 1020 | TRCN0000012599 | Mapk8ip1 |
|     | 954 | TRCN0000119623 | Lrp1    |     | 1021 | TRCN0000012600 | Mapk8ip1 |
|     | 955 | TRCN0000119624 | Lrp1    | 213 | 1022 | TRCN0000004691 | Mcl1     |
|     | 956 | TRCN0000119625 | Lrp1    |     | 1023 | TRCN0000004692 | Mcl1     |
|     | 957 | TRCN0000119626 | Lrp1    |     | 1024 | TRCN0000004693 | Mcl1     |
| 199 | 958 | TRCN0000119607 | Lrp1b   |     | 1025 | TRCN0000004694 | Mcl1     |
|     | 959 | TRCN0000119608 | Lrp1b   |     | 1026 | TRCN0000004695 | Mcl1     |
|     | 960 | TRCN0000119609 | Lrp1b   | 214 | 1027 | TRCN0000012068 | Mef2c    |
|     | 961 | TRCN0000119610 | Lrp1b   |     | 1028 | TRCN0000012069 | Mef2c    |
|     | 962 | TRCN0000119611 | Lrp1b   |     | 1029 | TRCN0000012070 | Mef2c    |
| 200 | 963 | TRCN0000119632 | Lrp4    |     | 1030 | TRCN0000012071 | Mef2c    |
|     | 964 | TRCN0000119633 | Lrp4    |     | 1031 | TRCN0000012072 | Mef2c    |
|     | 965 | TRCN0000119634 | Lrp4    | 215 | 1032 | TRCN0000012523 | Meis1    |
|     | 966 | TRCN0000119635 | Lrp4    |     | 1033 | TRCN0000012524 | Meis1    |
|     | 967 | TRCN0000119636 | Lrp4    |     | 1034 | TRCN0000012525 | Meis1    |
| 201 | 968 | TRCN0000109360 | Lrp6    |     | 1035 | TRCN0000012526 | Meis1    |
|     | 969 | TRCN0000109361 | Lrp6    |     | 1036 | TRCN0000012527 | Meis1    |
|     | 970 | TRCN0000109362 | Lrp6    | 216 | 1037 | TRCN0000022599 | Mkl1     |
|     | 971 | TRCN0000109363 | Lrp6    |     | 1038 | TRCN0000022600 | Mkl1     |
|     | 972 | TRCN0000109364 | Lrp6    |     | 1039 | TRCN0000022601 | Mkl1     |
| 202 | 973 | TRCN0000108455 | Lrrc4c  |     | 1040 | TRCN0000022602 | Mkl1     |
|     | 974 | TRCN0000108456 | Lrrc4c  |     | 1041 | TRCN0000022603 | Mkl1     |
|     | 975 | TRCN0000108457 | Lrrc4c  | 217 | 1042 | TRCN0000034424 | Mll1     |
|     | 976 | TRCN0000108458 | Lrrc4c  |     | 1043 | TRCN0000034428 | Mll1     |
|     | 977 | TRCN0000108459 | Lrrc4c  | 218 | 1044 | TRCN0000032834 | Mmp16    |
| 203 | 978 | TRCN0000102225 | Lrrfip1 |     | 1045 | TRCN0000032835 | Mmp16    |
|     | 979 | TRCN0000102226 | Lrrfip1 |     | 1046 | TRCN0000032836 | Mmp16    |
|     | 980 | TRCN0000102227 | Lrrfip1 |     | 1047 | TRCN0000032837 | Mmp16    |
|     | 981 | TRCN0000102229 | Lrrfip1 |     | 1048 | TRCN0000032838 | Mmp16    |
| 204 | 982 | TRCN0000189740 | Ly6g6c  | 219 | 1049 | TRCN0000071523 | Morf4l1  |
|     | 983 | TRCN0000190117 | Ly6g6c  |     | 1050 | TRCN0000071524 | Morf4l1  |
|     | 984 | TRCN0000193012 | Ly6g6c  |     | 1051 | TRCN0000071525 | Morf4l1  |
|     | 985 | TRCN0000202432 | Ly6g6c  |     | 1052 | TRCN0000071526 | Morf4l1  |
| 205 | 986 | TRCN0000012608 | Map2k7  |     | 1053 | TRCN0000071527 | Morf4l1  |
|     | 987 | TRCN0000012609 | Map2k7  | 195 | 1054 | TRCN0000012663 | Mre11a   |
|     | 988 | TRCN0000012610 | Map2k7  |     | 1055 | TRCN0000012664 | Mre11a   |
|     | 989 | TRCN0000012611 | Map2k7  |     | 1056 | TRCN0000012665 | Mre11a   |
|     | 990 | TRCN0000012612 | Map2k7  |     | 1057 | TRCN0000012667 | Mre11a   |
| 206 | 991 | TRCN0000012763 | Map3k14 | 196 | 1058 | TRCN0000070623 | Msx1     |
|     | 992 | TRCN0000012764 | Map3k14 |     | 1059 | TRCN0000070624 | Msx1     |
|     | 993 | TRCN0000012765 | Map3k14 |     | 1060 | TRCN0000070625 | Msx1     |
|     | 994 | TRCN0000012766 | Map3k14 |     | 1061 | TRCN0000070626 | Msx1     |
|     | 995 | TRCN0000012767 | Map3k14 |     | 1062 | TRCN0000070627 | Msx1     |
| 207 | 996 | TRCN0000012758 | Map4k1  | 197 | 1063 | TRCN0000075943 | Mthfd11  |

|     |      |                |         |     |      |                |        |
|-----|------|----------------|---------|-----|------|----------------|--------|
|     | 1064 | TRCN0000075944 | Mthfd1l | 209 | 1131 | TRCN0000075348 | Nfix   |
|     | 1065 | TRCN0000075945 | Mthfd1l |     | 1132 | TRCN0000075349 | Nfix   |
|     | 1066 | TRCN0000075946 | Mthfd1l |     | 1133 | TRCN0000075350 | Nfix   |
|     | 1067 | TRCN0000075947 | Mthfd1l |     | 1134 | TRCN0000075351 | Nfix   |
| 198 | 1068 | TRCN0000042513 | Myc     |     | 1135 | TRCN0000075352 | Nfix   |
|     | 1069 | TRCN0000042514 | Myc     | 210 | 1136 | TRCN0000096119 | Nfkbia |
|     | 1070 | TRCN0000042515 | Myc     |     | 1137 | TRCN0000096120 | Nfkbia |
|     | 1071 | TRCN0000042516 | Myc     |     | 1138 | TRCN0000096121 | Nfkbia |
|     | 1072 | TRCN0000042517 | Myc     |     | 1139 | TRCN0000096122 | Nfkbia |
|     | 1073 | TRCN0000054853 | Myc     |     | 1140 | TRCN0000096123 | Nfkbia |
|     | 1074 | TRCN0000054854 | Myc     | 211 | 1141 | TRCN0000025895 | Notch1 |
|     | 1075 | TRCN0000054855 | Myc     |     | 1142 | TRCN0000025902 | Notch1 |
|     | 1076 | TRCN0000054856 | Myc     |     | 1143 | TRCN0000025908 | Notch1 |
| 199 | 1077 | TRCN0000011993 | Myef2   |     | 1144 | TRCN0000025918 | Notch1 |
|     | 1078 | TRCN0000011994 | Myef2   |     | 1145 | TRCN0000025935 | Notch1 |
|     | 1079 | TRCN0000011995 | Myef2   | 212 | 1146 | TRCN0000012063 | Nr1d2  |
|     | 1080 | TRCN0000011996 | Myef2   |     | 1147 | TRCN0000012064 | Nr1d2  |
|     | 1081 | TRCN0000011997 | Myef2   |     | 1148 | TRCN0000012065 | Nr1d2  |
| 200 | 1082 | TRCN0000071503 | Myh9    |     | 1149 | TRCN0000012066 | Nr1d2  |
|     | 1083 | TRCN0000071504 | Myh9    |     | 1150 | TRCN0000012067 | Nr1d2  |
|     | 1084 | TRCN0000071505 | Myh9    | 213 | 1151 | TRCN0000034389 | Nras   |
|     | 1085 | TRCN0000071506 | Myh9    |     | 1152 | TRCN0000034390 | Nras   |
|     | 1086 | TRCN0000071507 | Myh9    |     | 1153 | TRCN0000034391 | Nras   |
| 201 | 1087 | TRCN0000125409 | Nav1    |     | 1154 | TRCN0000034392 | Nras   |
|     | 1088 | TRCN0000125410 | Nav1    |     | 1155 | TRCN0000034393 | Nras   |
|     | 1089 | TRCN0000125411 | Nav1    | 214 | 1156 | TRCN0000025299 | Nrk    |
|     | 1090 | TRCN0000125412 | Nav1    |     | 1157 | TRCN0000025300 | Nrk    |
|     | 1091 | TRCN0000125413 | Nav1    |     | 1158 | TRCN0000025301 | Nrk    |
| 202 | 1092 | TRCN0000009791 | Nedd9   |     | 1159 | TRCN0000025302 | Nrk    |
|     | 1093 | TRCN0000009792 | Nedd9   |     | 1160 | TRCN0000025303 | Nrk    |
|     | 1094 | TRCN0000009793 | Nedd9   | 215 | 1161 | TRCN0000029859 | Nrp1   |
|     | 1095 | TRCN0000009794 | Nedd9   |     | 1162 | TRCN0000029860 | Nrp1   |
|     | 1096 | TRCN0000009795 | Nedd9   |     | 1163 | TRCN0000029861 | Nrp1   |
| 203 | 1097 | TRCN0000087559 | Neto1   |     | 1164 | TRCN0000029862 | Nrp1   |
|     | 1098 | TRCN0000087560 | Neto1   |     | 1165 | TRCN0000029863 | Nrp1   |
|     | 1099 | TRCN0000087561 | Neto1   | 216 | 1166 | TRCN0000028974 | Nrp2   |
|     | 1100 | TRCN0000087562 | Neto1   |     | 1167 | TRCN0000028975 | Nrp2   |
| 204 | 1101 | TRCN0000086943 | Neto2   |     | 1168 | TRCN0000028976 | Nrp2   |
|     | 1102 | TRCN0000086944 | Neto2   |     | 1169 | TRCN0000028977 | Nrp2   |
|     | 1103 | TRCN0000086945 | Neto2   |     | 1170 | TRCN0000028978 | Nrp2   |
|     | 1104 | TRCN0000086946 | Neto2   | 217 | 1171 | TRCN0000094624 | Nrxn1  |
|     | 1105 | TRCN0000086947 | Neto2   |     | 1172 | TRCN0000094625 | Nrxn1  |
| 205 | 1106 | TRCN0000034339 | Nf1     |     | 1173 | TRCN0000094626 | Nrxn1  |
|     | 1107 | TRCN0000034340 | Nf1     |     | 1174 | TRCN0000094627 | Nrxn1  |
|     | 1108 | TRCN0000034341 | Nf1     |     | 1175 | TRCN0000094628 | Nrxn1  |
|     | 1109 | TRCN0000034342 | Nf1     | 218 | 1176 | TRCN0000094486 | Nrxn2  |
|     | 1110 | TRCN0000034343 | Nf1     |     | 1177 | TRCN0000094487 | Nrxn2  |
| 206 | 1111 | TRCN0000075343 | Nfe2l1  |     | 1178 | TRCN0000094488 | Nrxn2  |
|     | 1112 | TRCN0000075344 | Nfe2l1  | 219 | 1179 | TRCN0000094189 | Nrxn3  |
|     | 1113 | TRCN0000075345 | Nfe2l1  |     | 1180 | TRCN0000094190 | Nrxn3  |
|     | 1114 | TRCN0000075346 | Nfe2l1  |     | 1181 | TRCN0000094191 | Nrxn3  |
|     | 1115 | TRCN0000075347 | Nfe2l1  |     | 1182 | TRCN0000094192 | Nrxn3  |
| 207 | 1116 | TRCN0000012128 | Nfe2l2  |     | 1183 | TRCN0000094193 | Nrxn3  |
|     | 1117 | TRCN0000012129 | Nfe2l2  | 220 | 1184 | TRCN0000114176 | Nudt14 |
|     | 1118 | TRCN0000012130 | Nfe2l2  |     | 1185 | TRCN0000114177 | Nudt14 |
|     | 1119 | TRCN0000012131 | Nfe2l2  |     | 1186 | TRCN0000114178 | Nudt14 |
|     | 1120 | TRCN0000012132 | Nfe2l2  |     | 1187 | TRCN0000114179 | Nudt14 |
|     | 1121 | TRCN0000054658 | Nfe2l2  |     | 1188 | TRCN0000114180 | Nudt14 |
|     | 1122 | TRCN0000054659 | Nfe2l2  | 221 | 1189 | TRCN0000072128 | Numa1  |
|     | 1123 | TRCN0000054660 | Nfe2l2  |     | 1190 | TRCN0000072129 | Numa1  |
|     | 1124 | TRCN0000054661 | Nfe2l2  |     | 1191 | TRCN0000072130 | Numa1  |
|     | 1125 | TRCN0000054662 | Nfe2l2  |     | 1192 | TRCN0000072131 | Numa1  |
| 208 | 1126 | TRCN0000012088 | Nfib    | 222 | 1193 | TRCN0000075838 | Oas1f  |
|     | 1127 | TRCN0000012089 | Nfib    |     | 1194 | TRCN0000075839 | Oas1f  |
|     | 1128 | TRCN0000012090 | Nfib    |     | 1195 | TRCN0000075840 | Oas1f  |
|     | 1129 | TRCN0000012091 | Nfib    |     | 1196 | TRCN0000075841 | Oas1f  |
|     | 1130 | TRCN0000012092 | Nfib    |     | 1197 | TRCN0000075842 | Oas1f  |



|     |      |                |         |      |                |                |               |
|-----|------|----------------|---------|------|----------------|----------------|---------------|
| 223 | 1198 | TRCN0000071193 | Orc3l   | 1265 | TRCN0000123361 | Pkp4           |               |
|     | 1199 | TRCN0000071194 | Orc3l   | 1266 | TRCN0000123362 | Pkp4           |               |
|     | 1200 | TRCN0000071195 | Orc3l   | 1267 | TRCN0000123363 | Pkp4           |               |
|     | 1201 | TRCN0000071197 | Orc3l   | 238  | 1268           | TRCN0000076908 | Plcb1         |
| 224 | 1202 | TRCN0000025154 | Pak3    | 1269 | TRCN0000076909 | Plcb1          |               |
|     | 1203 | TRCN0000025155 | Pak3    | 1270 | TRCN0000076910 | Plcb1          |               |
|     | 1204 | TRCN0000025156 | Pak3    | 1271 | TRCN0000076911 | Plcb1          |               |
|     | 1205 | TRCN0000025157 | Pak3    | 1272 | TRCN0000076912 | Plcb1          |               |
|     | 1206 | TRCN0000025158 | Pak3    | 239  | 1273           | TRCN0000105980 | Ppp1r9a       |
| 225 | 1207 | TRCN0000032809 | Pappa2  | 1274 | TRCN0000105981 | Ppp1r9a        |               |
|     | 1208 | TRCN0000032810 | Pappa2  | 1275 | TRCN0000105982 | Ppp1r9a        |               |
|     | 1209 | TRCN0000032811 | Pappa2  | 1276 | TRCN0000105983 | Ppp1r9a        |               |
|     | 1210 | TRCN0000032812 | Pappa2  | 1277 | TRCN0000105984 | Ppp1r9a        |               |
|     | 1211 | TRCN0000032813 | Pappa2  | 240  | 1278           | TRCN0000081058 | Ppp3ca        |
| 226 | 1212 | TRCN0000012573 | Pbx1    | 1279 | TRCN0000081059 | Ppp3ca         |               |
|     | 1213 | TRCN0000012574 | Pbx1    | 1280 | TRCN0000081060 | Ppp3ca         |               |
|     | 1214 | TRCN0000012577 | Pbx1    | 1281 | TRCN0000081061 | Ppp3ca         |               |
| 227 | 1215 | TRCN0000094899 | Pcdh15  | 1282 | TRCN0000081062 | Ppp3ca         |               |
|     | 1216 | TRCN0000094900 | Pcdh15  | 241  | 1283           | TRCN0000085193 | Prdm9         |
|     | 1217 | TRCN0000094901 | Pcdh15  | 1284 | TRCN0000085194 | Prdm9          |               |
|     | 1218 | TRCN0000094902 | Pcdh15  | 1285 | TRCN0000085195 | Prdm9          |               |
|     | 1219 | TRCN0000094903 | Pcdh15  | 1286 | TRCN0000085196 | Prdm9          |               |
| 228 | 1220 | TRCN0000111680 | Pclo    | 1287 | TRCN0000085197 | Prdm9          |               |
|     | 1221 | TRCN0000111681 | Pclo    | 242  | 1288           | TRCN0000091048 | Prickle2      |
|     | 1222 | TRCN0000111682 | Pclo    | 1289 | TRCN0000091049 | Prickle2       |               |
|     | 1223 | TRCN0000111683 | Pclo    | 1290 | TRCN0000091050 | Prickle2       |               |
|     | 1224 | TRCN0000111684 | Pclo    | 1291 | TRCN0000091051 | Prickle2       |               |
| 229 | 1225 | TRCN0000174416 | Pdpm    | 1292 | TRCN0000091052 | Prickle2       |               |
|     | 1226 | TRCN0000174621 | Pdpm    | 243  | 1293           | TRCN0000022875 | Prkca         |
|     | 1227 | TRCN0000175972 | Pdpm    | 1294 | TRCN0000022878 | Prkca          |               |
|     | 1228 | TRCN0000176005 | Pdpm    | 1295 | TRCN0000022754 | Prkci          |               |
| 230 | 1229 | TRCN0000025977 | Pgr     | 244  | 1296           | TRCN0000022755 | Prkci         |
|     | 1230 | TRCN0000025996 | Pgr     | 1297 | TRCN0000022756 | Prkci          |               |
|     | 1231 | TRCN0000026003 | Pgr     | 1298 | TRCN0000022757 | Prkci          |               |
|     | 1232 | TRCN0000026032 | Pgr     | 1299 | TRCN0000022758 | Prkci          |               |
| 231 | 1233 | TRCN0000055083 | Phlda2  | 245  | 1300           | TRCN0000022717 | Prkg2         |
|     | 1234 | TRCN0000055084 | Phlda2  | 1301 | TRCN0000022718 | Prkg2          |               |
|     | 1235 | TRCN0000055085 | Phlda2  | 246  | 1302           | TRCN0000115318 | Prom1 (CD133) |
|     | 1236 | TRCN0000055086 | Phlda2  | 1303 | TRCN0000115316 | Prom1 (CD133)  |               |
|     | 1237 | TRCN0000055087 | Phlda2  | 1304 | TRCN0000115317 | Prom1 (CD133)  |               |
| 232 | 1238 | TRCN0000088628 | Pik3ap1 | 1305 | TRCN0000115319 | Prom1 (CD133)  |               |
|     | 1239 | TRCN0000088629 | Pik3ap1 | 1306 | TRCN0000115320 | Prom1 (CD133)  |               |
|     | 1240 | TRCN0000088630 | Pik3ap1 | 247  | 1307           | TRCN0000025359 | Prpf4b        |
|     | 1241 | TRCN0000088631 | Pik3ap1 | 1308 | TRCN0000025360 | Prpf4b         |               |
|     | 1242 | TRCN0000088632 | Pik3ap1 | 1309 | TRCN0000025361 | Prpf4b         |               |
| 233 | 1243 | TRCN0000025614 | Pik3ca  | 1310 | TRCN0000025362 | Prpf4b         |               |
|     | 1244 | TRCN0000025615 | Pik3ca  | 1311 | TRCN0000025363 | Prpf4b         |               |
|     | 1245 | TRCN0000025616 | Pik3ca  | 248  | 1312           | TRCN0000012113 | Psip1         |
|     | 1246 | TRCN0000025617 | Pik3ca  | 1313 | TRCN0000012114 | Psip1          |               |
|     | 1247 | TRCN0000025618 | Pik3ca  | 1314 | TRCN0000012115 | Psip1          |               |
| 234 | 1248 | TRCN0000024584 | Pip5k1a | 1315 | TRCN0000012116 | Psip1          |               |
|     | 1249 | TRCN0000024585 | Pip5k1a | 1316 | TRCN0000012117 | Psip1          |               |
|     | 1250 | TRCN0000024586 | Pip5k1a | 249  | 1317           | TRCN0000042538 | Ptch1         |
|     | 1251 | TRCN0000024587 | Pip5k1a | 1318 | TRCN0000042539 | Ptch1          |               |
|     | 1252 | TRCN0000024588 | Pip5k1a | 1319 | TRCN0000042540 | Ptch1          |               |
| 235 | 1253 | TRCN0000054653 | Pitx1   | 1320 | TRCN0000042541 | Ptch1          |               |
|     | 1254 | TRCN0000054654 | Pitx1   | 1321 | TRCN0000042542 | Ptch1          |               |
|     | 1255 | TRCN0000054655 | Pitx1   | 250  | 1322           | TRCN0000028989 | Pten          |
|     | 1256 | TRCN0000054656 | Pitx1   | 1323 | TRCN0000028991 | Pten           |               |
|     | 1257 | TRCN0000054657 | Pitx1   | 1324 | TRCN0000028993 | Pten           |               |
| 236 | 1258 | TRCN0000072083 | Pkd1    | 251  | 1325           | TRCN0000011913 | Ptgds         |
|     | 1259 | TRCN0000072084 | Pkd1    | 1326 | TRCN0000011914 | Ptgds          |               |
|     | 1260 | TRCN0000072085 | Pkd1    | 1327 | TRCN0000011915 | Ptgds          |               |
|     | 1261 | TRCN0000072086 | Pkd1    | 1328 | TRCN0000011916 | Ptgds          |               |
|     | 1262 | TRCN0000072087 | Pkd1    | 1329 | TRCN0000011917 | Ptgds          |               |
| 237 | 1263 | TRCN0000123359 | Pkp4    | 252  | 1330           | TRCN0000067938 | Ptgs2         |
|     | 1264 | TRCN0000123360 | Pkp4    | 1331 | TRCN0000067939 | Ptgs2          |               |

|     |      |                |         |     |      |                |         |
|-----|------|----------------|---------|-----|------|----------------|---------|
|     | 1332 | TRCN0000067940 | Ptgs2   |     | 1399 | TRCN0000042552 | Rel     |
|     | 1333 | TRCN0000067941 | Ptgs2   | 263 | 1400 | TRCN0000120627 | Reln    |
|     | 1334 | TRCN0000067942 | Ptgs2   |     | 1401 | TRCN0000120628 | Reln    |
| 253 | 1335 | TRCN0000023484 | Ptk2    |     | 1402 | TRCN0000120629 | Reln    |
|     | 1336 | TRCN0000023485 | Ptk2    |     | 1403 | TRCN0000120630 | Reln    |
|     | 1337 | TRCN0000023486 | Ptk2    |     | 1404 | TRCN0000120631 | Reln    |
|     | 1338 | TRCN0000023487 | Ptk2    | 264 | 1405 | TRCN0000071343 | Rest    |
|     | 1339 | TRCN0000023488 | Ptk2    |     | 1406 | TRCN0000071344 | Rest    |
| 254 | 1340 | TRCN0000081068 | Ptprz1  |     | 1407 | TRCN0000071345 | Rest    |
|     | 1341 | TRCN0000081069 | Ptprz1  |     | 1408 | TRCN0000071346 | Rest    |
|     | 1342 | TRCN0000081070 | Ptprz1  |     | 1409 | TRCN0000071347 | Rest    |
|     | 1343 | TRCN0000081071 | Ptprz1  | 265 | 1410 | TRCN0000106155 | Rims2   |
|     | 1344 | TRCN0000081072 | Ptprz1  |     | 1411 | TRCN0000106156 | Rims2   |
| 255 | 1345 | TRCN0000100435 | Rab31   |     | 1412 | TRCN0000106157 | Rims2   |
|     | 1346 | TRCN0000100436 | Rab31   |     | 1413 | TRCN0000106158 | Rims2   |
|     | 1347 | TRCN0000100437 | Rab31   |     | 1414 | TRCN0000106159 | Rims2   |
|     | 1348 | TRCN0000100438 | Rab31   | 266 | 1415 | TRCN0000022634 | Ripk4   |
|     | 1349 | TRCN0000100439 | Rab31   |     | 1416 | TRCN0000022635 | Ripk4   |
| 256 | 1350 | TRCN0000055188 | Rac1    |     | 1417 | TRCN0000022636 | Ripk4   |
|     | 1351 | TRCN0000055189 | Rac1    |     | 1418 | TRCN0000022637 | Ripk4   |
|     | 1352 | TRCN0000055190 | Rac1    |     | 1419 | TRCN0000022638 | Ripk4   |
|     | 1353 | TRCN0000055191 | Rac1    | 267 | 1420 | TRCN0000027509 | Rxfp3   |
|     | 1354 | TRCN0000055192 | Rac1    |     | 1421 | TRCN0000027517 | Rxfp3   |
| 257 | 1355 | TRCN0000012658 | Rad51   |     | 1422 | TRCN0000027523 | Rxfp3   |
|     | 1356 | TRCN0000012659 | Rad51   |     | 1423 | TRCN0000027528 | Rxfp3   |
|     | 1357 | TRCN0000012660 | Rad51   |     | 1424 | TRCN0000027574 | Rxfp3   |
|     | 1358 | TRCN0000012661 | Rad51   | 268 | 1425 | TRCN0000011858 | S100a4  |
|     | 1359 | TRCN0000012662 | Rad51   |     | 1426 | TRCN0000011859 | S100a4  |
| 258 | 1360 | TRCN0000012628 | Raf1    |     | 1427 | TRCN0000011860 | S100a4  |
|     | 1361 | TRCN0000012629 | Raf1    |     | 1428 | TRCN0000011861 | S100a4  |
|     | 1362 | TRCN0000012630 | Raf1    |     | 1429 | TRCN0000011862 | S100a4  |
|     | 1363 | TRCN0000012631 | Raf1    | 269 | 1430 | TRCN0000072043 | S100a9  |
|     | 1364 | TRCN0000012632 | Raf1    |     | 1431 | TRCN0000072044 | S100a9  |
|     | 1365 | TRCN0000055138 | Raf1    |     | 1432 | TRCN0000072045 | S100a9  |
|     | 1366 | TRCN0000055139 | Raf1    |     | 1433 | TRCN0000072046 | S100a9  |
|     | 1367 | TRCN0000055140 | Raf1    |     | 1434 | TRCN0000072047 | S100a9  |
|     | 1368 | TRCN0000055141 | Raf1    | 270 | 1435 | TRCN0000071628 | Sfrs3   |
|     | 1369 | TRCN0000055142 | Raf1    |     | 1436 | TRCN0000071629 | Sfrs3   |
| 259 | 1370 | TRCN0000071953 | Rapgef3 |     | 1437 | TRCN0000071630 | Sfrs3   |
|     | 1371 | TRCN0000071954 | Rapgef3 |     | 1438 | TRCN0000071631 | Sfrs3   |
|     | 1372 | TRCN0000071955 | Rapgef3 |     | 1439 | TRCN0000071632 | Sfrs3   |
|     | 1373 | TRCN0000071956 | Rapgef3 | 271 | 1440 | TRCN0000071933 | Sfrs7   |
|     | 1374 | TRCN0000071957 | Rapgef3 |     | 1441 | TRCN0000071934 | Sfrs7   |
|     | 1375 | TRCN0000077653 | Rasa1   |     | 1442 | TRCN0000071935 | Sfrs7   |
|     | 1376 | TRCN0000077654 | Rasa1   |     | 1443 | TRCN0000071936 | Sfrs7   |
|     | 1377 | TRCN0000077655 | Rasa1   |     | 1444 | TRCN0000071937 | Sfrs7   |
|     | 1378 | TRCN0000077656 | Rasa1   | 272 | 1445 | TRCN0000022884 | Sgk     |
|     | 1379 | TRCN0000077657 | Rasa1   |     | 1446 | TRCN0000022885 | Sgk     |
| 260 | 1380 | TRCN0000042543 | Rb1     |     | 1447 | TRCN0000022886 | Sgk     |
|     | 1381 | TRCN0000042544 | Rb1     |     | 1448 | TRCN0000022887 | Sgk     |
|     | 1382 | TRCN0000042545 | Rb1     | 273 | 1449 | TRCN0000022879 | Sgk2    |
|     | 1383 | TRCN0000042546 | Rb1     |     | 1450 | TRCN0000022880 | Sgk2    |
|     | 1384 | TRCN0000042547 | Rb1     |     | 1451 | TRCN0000022881 | Sgk2    |
|     | 1385 | TRCN0000055378 | Rb1     |     | 1452 | TRCN0000022882 | Sgk2    |
|     | 1386 | TRCN0000055379 | Rb1     |     | 1453 | TRCN0000022883 | Sgk2    |
|     | 1387 | TRCN0000055380 | Rb1     | 274 | 1454 | TRCN0000011953 | Si      |
|     | 1388 | TRCN0000055381 | Rb1     |     | 1455 | TRCN0000011954 | Si      |
|     | 1389 | TRCN0000055382 | Rb1     |     | 1456 | TRCN0000011955 | Si      |
| 261 | 1390 | TRCN0000071273 | Rb12    |     | 1457 | TRCN0000011956 | Si      |
|     | 1391 | TRCN0000071274 | Rb12    |     | 1458 | TRCN0000011957 | Si      |
|     | 1392 | TRCN0000071275 | Rb12    | 275 | 1459 | TRCN0000042563 | Ski     |
|     | 1393 | TRCN0000071276 | Rb12    |     | 1460 | TRCN0000042564 | Ski     |
|     | 1394 | TRCN0000071277 | Rb12    |     | 1461 | TRCN0000042565 | Ski     |
| 262 | 1395 | TRCN0000042548 | Rel     |     | 1462 | TRCN0000042566 | Ski     |
|     | 1396 | TRCN0000042549 | Rel     |     | 1463 | TRCN0000042567 | Ski     |
|     | 1397 | TRCN0000042550 | Rel     | 276 | 1464 | TRCN0000079543 | Slc16a1 |
|     | 1398 | TRCN0000042551 | Rel     |     | 1465 | TRCN0000079544 | Slc16a1 |

|     |      |                |         |     |      |                |        |
|-----|------|----------------|---------|-----|------|----------------|--------|
|     | 1466 | TRCN0000079545 | Slc16a1 |     | 1533 | TRCN0000054700 | Spp1   |
|     | 1467 | TRCN0000079546 | Slc16a1 |     | 1534 | TRCN0000054701 | Spp1   |
|     | 1468 | TRCN0000079547 | Slc16a1 |     | 1535 | TRCN0000054702 | Spp1   |
| 277 | 1469 | TRCN0000079308 | Slc6a2  | 290 | 1536 | TRCN0000098415 | Sprr1b |
|     | 1470 | TRCN0000079309 | Slc6a2  |     | 1537 | TRCN0000098416 | Sprr1b |
|     | 1471 | TRCN0000079310 | Slc6a2  |     | 1538 | TRCN0000098417 | Sprr1b |
|     | 1472 | TRCN0000079311 | Slc6a2  |     | 1539 | TRCN0000098418 | Sprr1b |
|     | 1473 | TRCN0000079312 | Slc6a2  |     | 1540 | TRCN0000098419 | Sprr1b |
| 278 | 1474 | TRCN0000079253 | Slco3a1 | 301 | 1541 | TRCN0000065478 | Spry1  |
|     | 1475 | TRCN0000079254 | Slco3a1 |     | 1542 | TRCN0000065479 | Spry1  |
|     | 1476 | TRCN0000079255 | Slco3a1 |     | 1543 | TRCN0000065480 | Spry1  |
|     | 1477 | TRCN0000079256 | Slco3a1 |     | 1544 | TRCN0000065481 | Spry1  |
|     | 1478 | TRCN0000079257 | Slco3a1 |     | 1545 | TRCN0000065482 | Spry1  |
| 279 | 1479 | TRCN0000106575 | Slit1   | 302 | 1546 | TRCN0000103591 | Spry2  |
|     | 1480 | TRCN0000106576 | Slit1   |     | 1547 | TRCN0000103592 | Spry2  |
|     | 1481 | TRCN0000106577 | Slit1   |     | 1548 | TRCN0000103593 | Spry2  |
|     | 1482 | TRCN0000106578 | Slit1   |     | 1549 | TRCN0000103594 | Spry2  |
|     | 1483 | TRCN0000106579 | Slit1   | 303 | 1550 | TRCN0000065538 | Spry3  |
| 280 | 1484 | TRCN0000120817 | Slit2   |     | 1551 | TRCN0000065539 | Spry3  |
|     | 1485 | TRCN0000120818 | Slit2   |     | 1552 | TRCN0000065540 | Spry3  |
|     | 1486 | TRCN0000120819 | Slit2   |     | 1553 | TRCN0000065541 | Spry3  |
|     | 1487 | TRCN0000120820 | Slit2   |     | 1554 | TRCN0000065542 | Spry3  |
|     | 1488 | TRCN0000120821 | Slit2   | 304 | 1555 | TRCN0000065934 | Spry4  |
| 281 | 1489 | TRCN0000114071 | Slitrk3 |     | 1556 | TRCN0000065935 | Spry4  |
|     | 1490 | TRCN0000114073 | Slitrk3 |     | 1557 | TRCN0000065936 | Spry4  |
|     | 1491 | TRCN0000114074 | Slitrk3 |     | 1558 | TRCN0000065937 | Spry4  |
|     | 1492 | TRCN0000114075 | Slitrk3 | 305 | 1559 | TRCN0000103170 | Sptlc2 |
| 282 | 1493 | TRCN0000025884 | Smad1   |     | 1560 | TRCN0000103171 | Sptlc2 |
|     | 1494 | TRCN0000025910 | Smad1   |     | 1561 | TRCN0000103172 | Sptlc2 |
|     | 1495 | TRCN0000025933 | Smad1   |     | 1562 | TRCN0000103173 | Sptlc2 |
|     | 1496 | TRCN0000025963 | Smad1   |     | 1563 | TRCN0000103174 | Sptlc2 |
| 283 | 1497 | TRCN0000025881 | Smad4   | 306 | 1564 | TRCN0000125734 | Steap1 |
|     | 1498 | TRCN0000025885 | Smad4   |     | 1565 | TRCN0000125735 | Steap1 |
|     | 1499 | TRCN0000025900 | Smad4   |     | 1566 | TRCN0000125736 | Steap1 |
|     | 1500 | TRCN0000025953 | Smad4   |     | 1567 | TRCN0000125737 | Steap1 |
| 284 | 1501 | TRCN0000025891 | Smad9   |     | 1568 | TRCN0000125738 | Steap1 |
|     | 1502 | TRCN0000025893 | Smad9   | 307 | 1569 | TRCN0000023729 | Styk1  |
|     | 1503 | TRCN0000025912 | Smad9   |     | 1570 | TRCN0000023730 | Styk1  |
|     | 1504 | TRCN0000025913 | Smad9   |     | 1571 | TRCN0000023731 | Styk1  |
|     | 1505 | TRCN0000025937 | Smad9   |     | 1572 | TRCN0000023732 | Styk1  |
| 285 | 1506 | TRCN0000071398 | Smarca2 |     | 1573 | TRCN0000023733 | Styk1  |
|     | 1507 | TRCN0000071399 | Smarca2 | 308 | 1574 | TRCN0000072048 | Sub1   |
|     | 1508 | TRCN0000071400 | Smarca2 |     | 1575 | TRCN0000072049 | Sub1   |
|     | 1509 | TRCN0000071401 | Smarca2 |     | 1576 | TRCN0000072050 | Sub1   |
|     | 1510 | TRCN0000071402 | Smarca2 |     | 1577 | TRCN0000072051 | Sub1   |
| 286 | 1511 | TRCN0000085748 | Sox2    |     | 1578 | TRCN0000072052 | Sub1   |
|     | 1512 | TRCN0000085749 | Sox2    | 309 | 1579 | TRCN0000125999 | Susd2  |
|     | 1513 | TRCN0000085750 | Sox2    |     | 1580 | TRCN0000126000 | Susd2  |
|     | 1514 | TRCN0000085751 | Sox2    |     | 1581 | TRCN0000126001 | Susd2  |
|     | 1515 | TRCN0000085752 | Sox2    |     | 1582 | TRCN0000126002 | Susd2  |
| 287 | 1516 | TRCN0000086338 | Spic    |     | 1583 | TRCN0000126003 | Susd2  |
|     | 1517 | TRCN0000086339 | Spic    | 310 | 1584 | TRCN0000108875 | Syne1  |
|     | 1518 | TRCN0000086340 | Spic    |     | 1585 | TRCN0000108876 | Syne1  |
|     | 1519 | TRCN0000086341 | Spic    |     | 1586 | TRCN0000108877 | Syne1  |
|     | 1520 | TRCN0000086342 | Spic    |     | 1587 | TRCN0000108878 | Syne1  |
| 288 | 1521 | TRCN0000087743 | Spink5  |     | 1588 | TRCN0000108879 | Syne1  |
|     | 1522 | TRCN0000087744 | Spink5  | 311 | 1589 | TRCN0000042573 | Tal1   |
|     | 1523 | TRCN0000087745 | Spink5  |     | 1590 | TRCN0000042574 | Tal1   |
|     | 1524 | TRCN0000087746 | Spink5  |     | 1591 | TRCN0000042575 | Tal1   |
|     | 1525 | TRCN0000087747 | Spink5  |     | 1592 | TRCN0000042576 | Tal1   |
| 289 | 1526 | TRCN0000009601 | Spp1    |     | 1593 | TRCN0000042577 | Tal1   |
|     | 1527 | TRCN0000009602 | Spp1    | 312 | 1594 | TRCN0000176581 | Tanc1  |
|     | 1528 | TRCN0000009603 | Spp1    |     | 1595 | TRCN0000176582 | Tanc1  |
|     | 1529 | TRCN0000009604 | Spp1    |     | 1596 | TRCN0000178012 | Tanc1  |
|     | 1530 | TRCN0000009605 | Spp1    |     | 1597 | TRCN0000178631 | Tanc1  |
|     | 1531 | TRCN0000054698 | Spp1    | 313 | 1598 | TRCN000012093  | Tcf4   |
|     | 1532 | TRCN0000054699 | Spp1    |     | 1599 | TRCN000012094  | Tcf4   |

|     |      |                |         |     |      |                |        |
|-----|------|----------------|---------|-----|------|----------------|--------|
|     | 1600 | TRCN0000012095 | Tcf4    |     | 1667 | TRCN0000012750 | Trp63  |
|     | 1601 | TRCN0000012096 | Tcf4    |     | 1668 | TRCN0000012751 | Trp63  |
|     | 1602 | TRCN0000012097 | Tcf4    |     | 1669 | TRCN0000012752 | Trp63  |
| 314 | 1603 | TRCN0000012178 | Tcf7l2  | 329 | 1670 | TRCN0000012753 | Trp73  |
|     | 1604 | TRCN0000012179 | Tcf7l2  |     | 1671 | TRCN0000012754 | Trp73  |
|     | 1605 | TRCN0000012180 | Tcf7l2  |     | 1672 | TRCN0000012755 | Trp73  |
|     | 1606 | TRCN0000012181 | Tcf7l2  |     | 1673 | TRCN0000012756 | Trp73  |
| 315 | 1607 | TRCN0000075508 | Tcfap2c |     | 1674 | TRCN0000012757 | Trp73  |
|     | 1608 | TRCN0000075509 | Tcfap2c | 330 | 1675 | TRCN0000094629 | Tspan6 |
|     | 1609 | TRCN0000075510 | Tcfap2c |     | 1676 | TRCN0000094630 | Tspan6 |
|     | 1610 | TRCN0000075511 | Tcfap2c |     | 1677 | TRCN0000094631 | Tspan6 |
|     | 1611 | TRCN0000075512 | Tcfap2c |     | 1678 | TRCN0000094632 | Tspan6 |
| 316 | 1612 | TRCN0000086223 | Tcfap2e |     | 1679 | TRCN0000094633 | Tspan6 |
|     | 1613 | TRCN0000086224 | Tcfap2e |     | 1680 | TRCN0000094474 | Tspan8 |
|     | 1614 | TRCN0000086225 | Tcfap2e | 331 | 1681 | TRCN0000094475 | Tspan8 |
|     | 1615 | TRCN0000086227 | Tcfap2e |     | 1682 | TRCN0000094477 | Tspan8 |
| 317 | 1616 | TRCN0000071308 | Terf2ip |     | 1683 | TRCN0000094478 | Tspan8 |
|     | 1617 | TRCN0000071309 | Terf2ip | 332 | 1684 | TRCN0000088743 | Ttn    |
|     | 1618 | TRCN0000071310 | Terf2ip |     | 1685 | TRCN0000088744 | Ttn    |
|     | 1619 | TRCN0000071311 | Terf2ip |     | 1686 | TRCN0000088745 | Ttn    |
|     | 1620 | TRCN0000071312 | Terf2ip |     | 1687 | TRCN0000088746 | Ttn    |
| 318 | 1621 | TRCN0000054809 | Tgfb1   |     | 1688 | TRCN0000088747 | Ttn    |
|     | 1622 | TRCN0000054811 | Tgfb1   | 333 | 1689 | TRCN0000071573 | Usf2   |
| 319 | 1623 | TRCN0000022624 | Tgfb2   |     | 1690 | TRCN0000071574 | Usf2   |
|     | 1624 | TRCN0000022625 | Tgfb2   |     | 1691 | TRCN0000071575 | Usf2   |
|     | 1625 | TRCN0000022626 | Tgfb2   |     | 1692 | TRCN0000071576 | Usf2   |
|     | 1626 | TRCN0000022627 | Tgfb2   |     | 1693 | TRCN0000071577 | Usf2   |
|     | 1627 | TRCN0000022628 | Tgfb2   | 334 | 1694 | TRCN0000042608 | Vav1   |
| 320 | 1628 | TRCN0000075523 | Tgif2   |     | 1695 | TRCN0000042609 | Vav1   |
|     | 1629 | TRCN0000075524 | Tgif2   |     | 1696 | TRCN0000042610 | Vav1   |
|     | 1630 | TRCN0000075525 | Tgif2   |     | 1697 | TRCN0000042611 | Vav1   |
|     | 1631 | TRCN0000075526 | Tgif2   |     | 1698 | TRCN0000042612 | Vav1   |
|     | 1632 | TRCN0000075527 | Tgif2   | 335 | 1699 | TRCN0000027068 | Vdr    |
| 321 | 1633 | TRCN0000042593 | Tiam1   |     | 1700 | TRCN0000027098 | Vdr    |
|     | 1634 | TRCN0000042595 | Tiam1   |     | 1701 | TRCN0000027101 | Vdr    |
|     | 1635 | TRCN0000042596 | Tiam1   |     | 1702 | TRCN0000027104 | Vdr    |
|     | 1636 | TRCN0000042597 | Tiam1   |     | 1703 | TRCN0000027123 | Vdr    |
| 322 | 1637 | TRCN0000112785 | Tm4sf1  | 336 | 1704 | TRCN0000066818 | Vegfa  |
|     | 1638 | TRCN0000112786 | Tm4sf1  |     | 1705 | TRCN0000066819 | Vegfa  |
|     | 1639 | TRCN0000112787 | Tm4sf1  |     | 1706 | TRCN0000066820 | Vegfa  |
|     | 1640 | TRCN0000112788 | Tm4sf1  |     | 1707 | TRCN0000066821 | Vegfa  |
|     | 1641 | TRCN0000112789 | Tm4sf1  |     | 1708 | TRCN0000066822 | Vegfa  |
| 323 | 1642 | TRCN0000174268 | Tm7sf3  | 337 | 1709 | TRCN0000097084 | Was    |
|     | 1643 | TRCN0000174778 | Tm7sf3  |     | 1710 | TRCN0000097085 | Was    |
|     | 1644 | TRCN0000193418 | Tm7sf3  |     | 1711 | TRCN0000097086 | Was    |
|     | 1645 | TRCN0000193467 | Tm7sf3  |     | 1712 | TRCN0000097087 | Was    |
|     | 1646 | TRCN0000193517 | Tm7sf3  |     | 1713 | TRCN0000097088 | Was    |
| 324 | 1647 | TRCN0000110735 | Tnc     | 338 | 1714 | TRCN0000012403 | Wasf1  |
|     | 1648 | TRCN0000110736 | Tnc     |     | 1715 | TRCN0000012404 | Wasf1  |
|     | 1649 | TRCN0000110737 | Tnc     |     | 1716 | TRCN0000012405 | Wasf1  |
|     | 1650 | TRCN0000110738 | Tnc     |     | 1717 | TRCN0000012406 | Wasf1  |
|     | 1651 | TRCN0000110739 | Tnc     |     | 1718 | TRCN0000012407 | Wasf1  |
| 325 | 1652 | TRCN0000023749 | Tnk2    | 339 | 1719 | TRCN0000099640 | Wasl   |
|     | 1653 | TRCN0000023750 | Tnk2    |     | 1720 | TRCN0000099641 | Wasl   |
|     | 1654 | TRCN0000023751 | Tnk2    |     | 1721 | TRCN0000099642 | Wasl   |
|     | 1655 | TRCN0000023752 | Tnk2    |     | 1722 | TRCN0000099643 | Wasl   |
|     | 1656 | TRCN0000023753 | Tnk2    |     | 1723 | TRCN0000099644 | Wasl   |
| 326 | 1657 | TRCN0000070163 | Tnpo2   | 340 | 1724 | TRCN0000183172 | Waspip |
|     | 1658 | TRCN0000070164 | Tnpo2   |     | 1725 | TRCN0000183384 | Waspip |
|     | 1659 | TRCN0000070165 | Tnpo2   |     | 1726 | TRCN0000184459 | Waspip |
|     | 1660 | TRCN0000070166 | Tnpo2   |     | 1727 | TRCN0000195856 | Waspip |
|     | 1661 | TRCN0000070167 | Tnpo2   | 341 | 1728 | TRCN0000115481 | Wdr63  |
| 327 | 1662 | TRCN0000012362 | Trp53   |     | 1729 | TRCN0000115482 | Wdr63  |
|     | 1663 | TRCN0000054551 | Trp53   |     | 1730 | TRCN0000115483 | Wdr63  |
|     | 1664 | TRCN0000054552 | Trp53   |     | 1731 | TRCN0000115484 | Wdr63  |
| 328 | 1665 | TRCN0000012748 | Trp63   |     | 1732 | TRCN0000115485 | Wdr63  |
|     | 1666 | TRCN0000012749 | Trp63   | 342 | 1733 | TRCN0000080203 | Wfdc1  |

|     |      |                |       |     |      |                |        |
|-----|------|----------------|-------|-----|------|----------------|--------|
|     | 1734 | TRCN0000080204 | Wfdc1 |     | 1749 | TRCN0000095865 | Yap1   |
|     | 1735 | TRCN0000080205 | Wfdc1 |     | 1750 | TRCN0000095866 | Yap1   |
|     | 1736 | TRCN0000080206 | Wfdc1 |     | 1751 | TRCN0000095867 | Yap1   |
|     | 1737 | TRCN0000080207 | Wfdc1 |     | 1752 | TRCN0000095868 | Yap1   |
| 343 | 1738 | TRCN0000080198 | Wfdc2 | 346 | 1753 | TRCN0000071943 | Zfp503 |
|     | 1739 | TRCN0000080199 | Wfdc2 |     | 1754 | TRCN0000071944 | Zfp503 |
|     | 1740 | TRCN0000080200 | Wfdc2 |     | 1755 | TRCN0000071945 | Zfp503 |
|     | 1741 | TRCN0000080201 | Wfdc2 |     | 1756 | TRCN0000071946 | Zfp503 |
|     | 1742 | TRCN0000080202 | Wfdc2 |     | 1757 | TRCN0000071947 | Zfp503 |
| 344 | 1743 | TRCN0000042113 | Wwox  | 347 | 1758 | TRCN0000096684 | Zic1   |
|     | 1744 | TRCN0000042114 | Wwox  |     | 1759 | TRCN0000096685 | Zic1   |
|     | 1745 | TRCN0000042115 | Wwox  |     | 1760 | TRCN0000096686 | Zic1   |
|     | 1746 | TRCN0000042116 | Wwox  |     | 1761 | TRCN0000096687 | Zic1   |
|     | 1747 | TRCN0000042117 | Wwox  |     | 1762 | TRCN0000096688 | Zic1   |
| 345 | 1748 | TRCN0000095864 | Yap1  |     |      |                |        |

**Table S2.** List of genes mutated in 306 HNSCC patients ranked by statistical significance of enrichment of these genes with predicted functional mutations. Number of genes displayed: 16.

MM is a number of missense mutations

TM is a number of truncating mutations

SM is a number of silent mutations

FIS $\geq$ 2 is a number of missense mutations with the predicted functional score bigger than 2 [PMID: 21727090  
PMCID: PMC3177186]

DD and D are, respectively, numbers of homozygous and hemizygous deletions

AA and A are, respectively, numbers DNA copy amplifications and DNA copy gains;

P-val (FIS $\geq$ 2) is a probability to observe the obtained enrichment of predicted functional mutations in a given gene by chance taking as a background distribution the distribution of predicted functional mutations in all other genes. The significant enrichment of the functional mutations in a given gene as compared to the distribution of functional mutations across all other genes demonstrates the positive selection in tumor evolution and suggests that a given gene is a driver.

Q-val (FIS $\geq$ 2) are P-values adjusted for false discovery rate by Benjamini and Hochberg method with values below 0.1 being considered significant.

| Gene      | Cytoband | TS/OG | CG | Samples | MM  | TM  | SM | FIS $\geq$ 2.0 | P val (FIS $\geq$ 2.0) | Q val (FIS $\geq$ 2.0) |
|-----------|----------|-------|----|---------|-----|-----|----|----------------|------------------------|------------------------|
| TP53      | 17p13.1  | 1     | 9  | 302     | 171 | 128 | 6  | 160            | 0                      | 0                      |
| NOTCH1    | 9q34.3   | 1     | 10 | 302     | 43  | 31  | 7  | 33             | 0                      | 0                      |
| DNAH5     | 5p15.2   | 0     | 0  | 302     | 48  | 14  | 20 | 32             | 0                      | 0                      |
| NFE2L2    | 2q31.2   | 0     | 2  | 302     | 24  | 0   | 0  | 24             | 0                      | 0                      |
| CASP8     | 2q33.1   | 1     | 4  | 302     | 15  | 18  | 0  | 12             | 0                      | 0                      |
| MYH8      | 17p13.1  | 0     | 0  | 302     | 21  | 2   | 4  | 15             | 0.000001               | 0.002                  |
| SMARCA4   | 19p13.2  | 1     | 4  | 302     | 16  | 1   | 1  | 12             | 0.000003               | 0.006                  |
| FAT1      | 4q35.2   | 1     | 1  | 302     | 22  | 89  | 2  | 13             | 0.000006               | 0.009                  |
| RAC1      | 7p22.1   | 0     | 4  | 302     | 10  | 0   | 0  | 9              | 0.000006               | 0.011                  |
| CUL3      | 2q36.2   | 0     | 0  | 302     | 9   | 5   | 1  | 8              | 0.000006               | 0.011                  |
| HIST1H2BD | 6p22.1   | 0     | 0  | 302     | 6   | 1   | 0  | 6              | 0.000009               | 0.012                  |
| SCN3A     | 2q24.3   | 0     | 1  | 302     | 16  | 2   | 3  | 13             | 0.00001                | 0.016                  |
| PCDHGA1   | 5q31.3   | 0     | 0  | 302     | 10  | 2   | 1  | 9              | 0.00002                | 0.023                  |
| PRPF6     | 20q13.33 | 0     | 1  | 302     | 9   | 0   | 2  | 8              | 0.00002                | 0.023                  |
| EP300     | 22q13.2  | 0     | 10 | 302     | 22  | 8   | 1  | 14             | 0.00002                | 0.023                  |
| MYH9      | 22q12.3  | 0     | 5  | 302     | 16  | 2   | 4  | 12             | 0.00003                | 0.024                  |

**Table S3.** Statistics of genomic alterations of *MYH9* across 10 cancer types found in the TCGA data set.

| Gene | Cytoband | Cancer type                                                                               | Samples | MM  | TM | SM | FIS>=2.0  | DD | D           | AA | A   | Cancers with DFTM enrichment | Cancers with FM enrichment                 | Cancers with FTM enrichment                                    |
|------|----------|-------------------------------------------------------------------------------------------|---------|-----|----|----|-----------|----|-------------|----|-----|------------------------------|--------------------------------------------|----------------------------------------------------------------|
| MYH9 | 22q12.3  | BLCA/<br>LUSC/ GBM/<br>KIRC/<br>COADREAD<br>/UCEC/<br><b>HNSC</b> /<br>BRCA/ OVC/<br>LUAD | 3081    | 102 | 24 | 28 | <b>58</b> | 5  | <b>1076</b> | 16 | 323 | LUSC                         | LUSC/<br>COADREAD/<br>UCEC/<br><b>HNSC</b> | LUSC/<br>COADREAD<br>/ UCEC/<br><b>HNSC</b> /<br>BRCA/<br>LUAD |

Please, see table 2 for abbreviations.

FM - significant enrichment of predicted functional mutations

FTM significant enrichment of predicted functional and truncating mutations

DFTM - significant enrichment of predicted functional, truncating mutations and deletion

BLCA: bladder carcinoma; LUSC: lung squamous cell carcinoma; GBM: glioblastoma; KIRC: Kidney Renal Papillary Cell Carcinoma; COADREAD: colorectal carcinoma; UCEC: cervical SCC & endocervical carcinoma; HNSCC: head and neck SCC; BRCA: breast carcinoma; OVC: ovarian carcinoma; LUAD; lung adenocarcinoma

**Table S4.** Full list of cancer types with their respective percentage of *MYH9* hemizyosity

| <u>Human Cancers:</u>                                            | MYH9<br>hemizyosity                                      |                                                 | MYH9<br>hemizyosity                                    |
|------------------------------------------------------------------|----------------------------------------------------------|-------------------------------------------------|--------------------------------------------------------|
| HNSCC                                                            | 15%                                                      | Lung Adenocarcinoma                             | 40%                                                    |
|                                                                  |                                                          | Lung Squamous Cell Carcinoma                    | 9%                                                     |
| Acute Myeloid Leukemia                                           | 1%                                                       | Lymphoid Neoplasm Diffuse Large B-cell Lymphoma | 6%                                                     |
| Bladder Urothelial Carcinoma                                     | 35%                                                      | Ovarian Serous Cystadenocarcinoma               | 79%                                                    |
| Brain Lower Grade Glioma                                         | 10%                                                      | Pancreatic Adenocarcinoma                       | 15%                                                    |
| Breast Invasive Carcinoma                                        | 46%                                                      | Prostate Adenocarcinoma                         | 8%                                                     |
| Cervical Squamous Cell Carcinoma and Endocervical Adenocarcinoma | 26%                                                      | Sarcoma                                         | 42%                                                    |
| Colon and Rectum Adenocarcinoma                                  | 34%                                                      | Skin Cutaneous Melanoma                         | 10%                                                    |
| Glioblastoma Multiforme                                          | 38%                                                      | Stomach Adenocarcinoma                          | 29%                                                    |
| Kidney Renal Clear Cell Carcinoma                                | 8%                                                       | Thyroid Carcinoma                               | 17%                                                    |
| Kidney Renal Papillary Cell Carcinoma                            | 26%                                                      | Uterine Corpus Endometrial Carcinoma            | 11%                                                    |
|                                                                  | Tumor<br>incidence                                       |                                                 | Tumor<br>incidence                                     |
| <u>Mouse:</u>                                                    | heterozygous <i>Myh9</i> iKO <i>TbRII</i> -iKO mice ~26% |                                                 | homozygous <i>Myh9</i> iKO <i>TbRII</i> -iKO mice 100% |

## References

1. C. R. Leemans, B. J. Braakhuis, R. H. Brakenhoff, The molecular biology of head and neck cancer. *Nat. Rev. Cancer* **11**, 9–22 (2011). [doi:10.1038/nrc2982](https://doi.org/10.1038/nrc2982) [Medline](#)
2. N. Stransky, A. M. Egloff, A. D. Tward, A. D. Kostic, K. Cibulskis, A. Sivachenko, G. V. Kryukov, M. S. Lawrence, C. Sougnez, A. McKenna, E. Shefler, A. H. Ramos, P. Stojanov, S. L. Carter, D. Voet, M. L. Cortés, D. Auclair, M. F. Berger, G. Saksena, C. Guiducci, R. C. Onofrio, M. Parkin, M. Romkes, J. L. Weissfeld, R. R. Seethala, L. Wang, C. Rangel-Escareño, J. C. Fernandez-Lopez, A. Hidalgo-Miranda, J. Melendez-Zajgla, W. Winckler, K. Ardlie, S. B. Gabriel, M. Meyerson, E. S. Lander, G. Getz, T. R. Golub, L. A. Garraway, J. R. Grandis, The mutational landscape of head and neck squamous cell carcinoma. *Science* **333**, 1157–1160 (2011). [doi:10.1126/science.1208130](https://doi.org/10.1126/science.1208130)
3. N. Agrawal, M. J. Frederick, C. R. Pickering, C. Bettegowda, K. Chang, R. J. Li, C. Fakhry, T. X. Xie, J. Zhang, J. Wang, N. Zhang, A. K. El-Naggar, S. A. Jasser, J. N. Weinstein, L. Treviño, J. A. Drummond, D. M. Muzny, Y. Wu, L. D. Wood, R. H. Hruban, W. H. Westra, W. M. Koch, J. A. Califano, R. A. Gibbs, D. Sidransky, B. Vogelstein, V. E. Velculescu, N. Papadopoulos, D. A. Wheeler, K. W. Kinzler, J. N. Myers, Exome sequencing of head and neck squamous cell carcinoma reveals inactivating mutations in NOTCH1. *Science* **333**, 1154–1157 (2011). [doi:10.1126/science.1206923](https://doi.org/10.1126/science.1206923) [Medline](#)
4. S. Beronja, G. Livshits, S. Williams, E. Fuchs, Rapid functional dissection of genetic networks via tissue-specific transduction and RNAi in mouse embryos. *Nat. Med.* **16**, 821–827 (2010). [doi:10.1038/nm.2167](https://doi.org/10.1038/nm.2167) [Medline](#)
5. T. R. Berton, T. Matsumoto, A. Page, C. J. Conti, C. X. Deng, J. L. Jorcano, D. G. Johnson, Tumor formation in mice with conditional inactivation of Brca1 in epithelial tissues. *Oncogene* **22**, 5415–5426 (2003). [doi:10.1038/sj.onc.1206825](https://doi.org/10.1038/sj.onc.1206825) [Medline](#)
6. G. Guasch, M. Schober, H. A. Pasolli, E. B. Conn, L. Polak, E. Fuchs, Loss of TGF $\beta$  signaling destabilizes homeostasis and promotes squamous cell carcinomas in stratified epithelia. *Cancer Cell* **12**, 313–327 (2007). [doi:10.1016/j.ccr.2007.08.020](https://doi.org/10.1016/j.ccr.2007.08.020) [Medline](#)
7. S. L. Lu, H. Herrington, D. Reh, S. Weber, S. Bornstein, D. Wang, A. G. Li, C. F. Tang, Y. Siddiqui, J. Nord, P. Andersen, C. L. Corless, X. J. Wang, Loss of transforming growth

- factor- $\beta$  type II receptor promotes metastatic head-and-neck squamous cell carcinoma. *Genes Dev.* **20**, 1331–1342 (2006). [doi:10.1101/gad.1413306](https://doi.org/10.1101/gad.1413306) [Medline](#)
8. M. Schober, E. Fuchs, Tumor-initiating stem cells of squamous cell carcinomas and their control by TGF- $\beta$  and integrin/focal adhesion kinase (FAK) signaling. *Proc. Natl. Acad. Sci. U.S.A.* **108**, 10544–10549 (2011). [doi:10.1073/pnas.1107807108](https://doi.org/10.1073/pnas.1107807108) [Medline](#)
9. C. Caulin, T. Nguyen, G. A. Lang, T. M. Goepfert, B. R. Brinkley, W. W. Cai, G. Lozano, D. R. Roop, An inducible mouse model for skin cancer reveals distinct roles for gain- and loss-of-function p53 mutations. *J. Clin. Invest.* **117**, 1893–1901 (2007). [doi:10.1172/JCI31721](https://doi.org/10.1172/JCI31721) [Medline](#)
10. D. Schramek, A. Kotsinas, A. Meixner, T. Wada, U. Elling, J. A. Pospisilik, G. G. Neely, R. H. Zwick, V. Sigl, G. Forni, M. Serrano, V. G. Gorgoulis, J. M. Penninger, The stress kinase MKK7 couples oncogenic stress to p53 stability and tumor suppression. *Nat. Genet.* **43**, 212–219 (2011). [doi:10.1038/ng.767](https://doi.org/10.1038/ng.767) [Medline](#)
11. B. Reva, Y. Antipin, C. Sander, Predicting the functional impact of protein mutations: Application to cancer genomics. *Nucleic Acids Res.* **39**, e118 (2011). [doi:10.1093/nar/gkr407](https://doi.org/10.1093/nar/gkr407) [Medline](#)
12. C. T. Murphy, R. S. Rock, J. A. Spudich, A myosin II mutation uncouples ATPase activity from motility and shortens step size. *Nat. Cell Biol.* **3**, 311–315 (2001). [doi:10.1038/35060110](https://doi.org/10.1038/35060110) [Medline](#)
13. S. Demehri, A. Turkoz, R. Kopan, Epidermal Notch1 loss promotes skin tumorigenesis by impacting the stromal microenvironment. *Cancer Cell* **16**, 55–66 (2009). [doi:10.1016/j.ccr.2009.05.016](https://doi.org/10.1016/j.ccr.2009.05.016) [Medline](#)
14. C. C. DuFort, M. J. Paszek, V. M. Weaver, Balancing forces: Architectural control of mechanotransduction. *Nat. Rev. Mol. Cell Biol.* **12**, 308–319 (2011). [doi:10.1038/nrm3112](https://doi.org/10.1038/nrm3112) [Medline](#)
15. A. Fritsch, M. Höckel, T. Kiessling, K. D. Nnetu, F. Wetzel, M. Zink, J. A. Käs, Are biomechanical changes necessary for tumour progression? *Nat. Phys.* **6**, 730–732 (2010). [doi:10.1038/nphys1800](https://doi.org/10.1038/nphys1800)



16. S. Beronja, P. Janki, E. Heller, W.-H. Lien, B. E. Keyes, N. Oshimori, E. Fuchs, RNAi screens in mice identify physiological regulators of oncogenic growth. *Nature* **501**, 185–190 (2013). [doi:10.1038/nature12464](https://doi.org/10.1038/nature12464)
17. P. Levéen, J. Larsson, M. Ehinger, C. M. Cilio, M. Sundler, L. J. Sjöstrand, R. Holmdahl, S. Karlsson, Induced disruption of the transforming growth factor  $\beta$  type II receptor gene in mice causes a lethal inflammatory disorder that is transplantable. *Blood* **100**, 560–568 (2002). [doi:10.1182/blood.V100.2.560](https://doi.org/10.1182/blood.V100.2.560) [Medline](#)
18. V. Vasioukhin, L. Degenstein, B. Wise, E. Fuchs, The magical touch: Genome targeting in epidermal stem cells induced by tamoxifen application to mouse skin. *Proc. Natl. Acad. Sci. U.S.A.* **96**, 8551–8556 (1999). [doi:10.1073/pnas.96.15.8551](https://doi.org/10.1073/pnas.96.15.8551) [Medline](#)
19. S. Srinivas, T. Watanabe, C. S. Lin, C. M. William, Y. Tanabe, T. M. Jessell, F. Costantini, Cre reporter strains produced by targeted insertion of EYFP and ECFP into the ROSA26 locus. *BMC Dev. Biol.* **1**, 4 (2001). [doi:10.1186/1471-213X-1-4](https://doi.org/10.1186/1471-213X-1-4) [Medline](#)
20. S. Beronja, G. Livshits, S. Williams, E. Fuchs, Rapid functional dissection of genetic networks via tissue-specific transduction and RNAi in mouse embryos. *Nat. Med.* **16**, 821–827 (2010). [doi:10.1038/nm.2167](https://doi.org/10.1038/nm.2167) [Medline](#)
21. S. Beronja, E. Fuchs, RNAi-mediated gene function analysis in skin. *Methods Mol. Biol.* **961**, 351–361 (2013). [doi:10.1007/978-1-62703-227-8\\_23](https://doi.org/10.1007/978-1-62703-227-8_23) [Medline](#)
22. G. Guasch, M. Schober, H. A. Pasolli, E. B. Conn, L. Polak, E. Fuchs, Loss of TGF $\beta$  signaling destabilizes homeostasis and promotes squamous cell carcinomas in stratified epithelia. *Cancer Cell* **12**, 313–327 (2007). [doi:10.1016/j.ccr.2007.08.020](https://doi.org/10.1016/j.ccr.2007.08.020) [Medline](#)
23. J. Moffat, D. A. Grueneberg, X. Yang, S. Y. Kim, A. M. Kloepper, G. Hinkle, B. Piqani, T. M. Eisenhaure, B. Luo, J. K. Grenier, A. E. Carpenter, S. Y. Foo, S. A. Stewart, B. R. Stockwell, N. Hacohen, W. C. Hahn, E. S. Lander, D. M. Sabatini, D. E. Root, A lentiviral RNAi library for human and mouse genes applied to an arrayed viral high-content screen. *Cell* **124**, 1283–1298 (2006). [doi:10.1016/j.cell.2006.01.040](https://doi.org/10.1016/j.cell.2006.01.040) [Medline](#)
24. S. Beronja, G. Livshits, S. Williams, E. Fuchs, Rapid functional dissection of genetic networks via tissue-specific transduction and RNAi in mouse embryos. *Nat. Med.* **16**, 821–827 (2010). [doi:10.1038/nm.2167](https://doi.org/10.1038/nm.2167) [Medline](#)

25. S. Beronja, P. Janki, E. Heller, W. H. Lien, B. E. Keyes, N. Oshimori, E. Fuchs, RNAi screens in mice identify physiological regulators of oncogenic growth. *Nature* **501**, 185–190 (2013). [doi:10.1038/nature12464](https://doi.org/10.1038/nature12464) [Medline](#)
26. S. E. Williams, S. Beronja, H. A. Pasolli, E. Fuchs, Asymmetric cell divisions promote Notch-dependent epidermal differentiation. *Nature* **470**, 353–358 (2011). [doi:10.1038/nature09793](https://doi.org/10.1038/nature09793) [Medline](#)
27. D. Schramek, A. Kotsinas, A. Meixner, T. Wada, U. Elling, J. A. Pospisilik, G. G. Neely, R. H. Zwick, V. Sigl, G. Forni, M. Serrano, V. G. Gorgoulis, J. M. Penninger, The stress kinase MKK7 couples oncogenic stress to p53 stability and tumor suppression. *Nat. Genet.* **43**, 212–219 (2011). [doi:10.1038/ng.767](https://doi.org/10.1038/ng.767) [Medline](#)
28. D. Schramek, A. Leibbrandt, V. Sigl, L. Kenner, J. A. Pospisilik, H. J. Lee, R. Hanada, P. A. Joshi, A. Aliprantis, L. Glimcher, M. Pasparakis, R. Khokha, C. J. Ormandy, M. Widschwendter, G. Schett, J. M. Penninger, Osteoclast differentiation factor RANKL controls development of progesterin-driven mammary cancer. *Nature* **468**, 98–102 (2010). [doi:10.1038/nature09387](https://doi.org/10.1038/nature09387) [Medline](#)
29. C. Blanpain, W. E. Lowry, A. Geoghegan, L. Polak, E. Fuchs, Self-renewal, multipotency, and the existence of two cell populations within an epithelial stem cell niche. *Cell* **118**, 635–648 (2004). [doi:10.1016/j.cell.2004.08.012](https://doi.org/10.1016/j.cell.2004.08.012) [Medline](#)
30. M. Schober, S. Raghavan, M. Nikolova, L. Polak, H. A. Pasolli, H. E. Beggs, L. F. Reichardt, E. Fuchs, Focal adhesion kinase modulates tension signaling to control actin and focal adhesion dynamics. *J. Cell Biol.* **176**, 667–680 (2007). [doi:10.1083/jcb.200608010](https://doi.org/10.1083/jcb.200608010) [Medline](#)
31. E. Cerami, J. Gao, U. Dogrusoz, B. E. Gross, S. O. Sumer, B. A. Aksoy, A. Jacobsen, C. J. Byrne, M. L. Heuer, E. Larsson, Y. Antipin, B. Reva, A. P. Goldberg, C. Sander, N. Schultz, The cBio cancer genomics portal: An open platform for exploring multidimensional cancer genomics data. *Cancer Discov* **2**, 401–404 (2012). [doi:10.1158/2159-8290.CD-12-0095](https://doi.org/10.1158/2159-8290.CD-12-0095) [Medline](#)
32. J. Gao, B. A. Aksoy, U. Dogrusoz, G. Dresdner, B. Gross, S. O. Sumer, Y. Sun, A. Jacobsen, R. Sinha, E. Larsson, E. Cerami, C. Sander, N. Schultz, Integrative analysis of complex

- cancer genomics and clinical profiles using the cBioPortal. *Sci. Signal.* **6**, pl1 (2013).  
[doi:10.1126/scisignal.2004088](https://doi.org/10.1126/scisignal.2004088) [Medline](#)
33. B. Reva, Y. Antipin, C. Sander, Predicting the functional impact of protein mutations: application to cancer genomics. *Nucleic Acids Res.* **39**, e118 (2011).  
[doi:10.1093/nar/gkr407](https://doi.org/10.1093/nar/gkr407) [Medline](#)
34. F. Gnad, A. Baucom, K. Mukhyala, G. Manning, Z. Zhang, Assessment of computational methods for predicting the effects of missense mutations in human cancers. *BMC Genomics* **14** (suppl. 3), S7 (2013). [Medline](#)
35. B. Reva, Revealing selection in cancer using the predicted functional impact of cancer mutations. Application to nomination of cancer drivers. *BMC Genomics* **14** (suppl. 3), S8 (2013). [doi:10.1186/1471-2164-14-S3-S8](https://doi.org/10.1186/1471-2164-14-S3-S8) [Medline](#)
36. A. Gonzalez-Perez, N. Lopez-Bigas, Functional impact bias reveals cancer drivers. *Nucleic Acids Res.* **40**, e169 (2012). [doi:10.1093/nar/gks743](https://doi.org/10.1093/nar/gks743) [Medline](#)
37. Cancer Genome Atlas Research Network, Integrated genomic analyses of ovarian carcinoma. *Nature* **474**, 609–615 (2011). [doi:10.1038/nature10166](https://doi.org/10.1038/nature10166)
38. Cancer Genome Atlas Research Network, Comprehensive genomic characterization defines human glioblastoma genes and core pathways. *Nature* **455**, 1061–1068 (2008).  
[doi:10.1038/nature07385](https://doi.org/10.1038/nature07385)
39. B. S. Taylor, N. Schultz, H. Hieronymus, A. Gopalan, Y. Xiao, B. S. Carver, V. K. Arora, P. Kaushik, E. Cerami, B. Reva, Y. Antipin, N. Mitsiades, T. Landers, I. Dolgalev, J. E. Major, M. Wilson, N. D. Socci, A. E. Lash, A. Heguy, J. A. Eastham, H. I. Scher, V. E. Reuter, P. T. Scardino, C. Sander, C. L. Sawyers, W. L. Gerald, Integrative genomic profiling of human prostate cancer. *Cancer Cell* **18**, 11–22 (2010).  
[doi:10.1016/j.ccr.2010.05.026](https://doi.org/10.1016/j.ccr.2010.05.026) [Medline](#)
40. J. Barretina, B. S. Taylor, S. Banerji, A. H. Ramos, M. Lagos-Quintana, P. L. Decarolis, K. Shah, N. D. Socci, B. A. Weir, A. Ho, D. Y. Chiang, B. Reva, C. H. Mermel, G. Getz, Y. Antipin, R. Beroukhim, J. E. Major, C. Hatton, R. Nicoletti, M. Hanna, T. Sharpe, T. J. Fennell, K. Cibulskis, R. C. Onofrio, T. Saito, N. Shukla, C. Lau, S. Nelander, S. J. Silver, C. Sougnez, A. Viale, W. Winckler, R. G. Maki, L. A. Garraway, A. Lash, H. Greulich, D. E. Root, W. R. Sellers, G. K. Schwartz, C. R. Antonescu, E. S. Lander, H. E.

Varmus, M. Ladanyi, C. Sander, M. Meyerson, S. Singer, Subtype-specific genomic alterations define new targets for soft-tissue sarcoma therapy. *Nat. Genet.* **42**, 715–721 (2010). [doi:10.1038/ng.619](https://doi.org/10.1038/ng.619) [Medline](#)

41. L. Chin, W. C. Hahn, G. Getz, M. Meyerson, Making sense of cancer genomic data. *Genes Dev.* **25**, 534–555 (2011). [doi:10.1101/gad.2017311](https://doi.org/10.1101/gad.2017311) [Medline](#)
